# Supplementary material for: Improved Method for Preparation of 3-(1H-Indol-3-yl)benzofuran-2(3H)-ones
Source: MDPI journal article supplement (doi:10.3390/molecules27061902), 2022-03-15
Supplement: s1 [file s1]

## Improved method for preparation of 3-(1*H*-Indol-3-yl)benzofuran-2(3*H*)-ones

Igor Yu. Grishin,<sup>1,\*</sup> Nikolai A. Arutiunov<sup>1</sup>, Dmitrii A. Aksenov<sup>1</sup>, Nicolai A. Aksenov<sup>1</sup>, Alexander V. Aksenov<sup>1</sup>, Amina Z. Gasanova<sup>1</sup>, Elena A. Sorokina<sup>2</sup>, Carolyn Lower<sup>3</sup> and Michael Rubin<sup>1,3,\*</sup>

<sup>1</sup> Department of Chemistry, North Caucasus Federal University, 1a Pushkin St., 355017 Stavropol, Russia; naksenov@ncfu.ru (N.A.A.); naarutiunov@ncfu.ru (N.A.A.); mr.twos@mail.ru (D.A.A.); aaksenov@ncfu.ru (A.V.A.); am.gasanova2017@gmail.com (A.Z.G.)

<sup>2</sup> Organic Chemistry Department, Peoples' Friendship University of Russia (RUDN University), 6, Miklukho-Maklaya St., 117198 Moscow, Russia; sorokina-ea@rudn.ru

<sup>3</sup> Department of Chemistry, University of Kansas, 1567 Irving Hill Road, Lawrence, KS 66045, USA; allisonwenger@ku.edu

## Supporting Information

|                                                                                                                                                |     |
|------------------------------------------------------------------------------------------------------------------------------------------------|-----|
| NMR Spectral Charts.....                                                                                                                       | S2  |
| <sup>1</sup> H and <sup>13</sup> C NMR spectral charts for ( <i>E</i> )-5-bromo-2-methyl-3-(2-nitrovinyl)-1 <i>H</i> -indole (3d).....         | S2  |
| <sup>1</sup> H and <sup>13</sup> C NMR spectral charts for 3-(1 <i>H</i> -indol-3-yl)benzofuran-2(3 <i>H</i> )-ones (8aa-8dd).....             | S4  |
| <sup>1</sup> H and <sup>13</sup> C NMR spectral charts for 4,5-Dimethyl-2-(1-(2-methyl-1 <i>H</i> -indol-3-yl)-2-nitroethyl)phenol (9aa):..... | S30 |
| HRMS spectral charts.....                                                                                                                      | S32 |
| HRMS spectral chart for starting ( <i>E</i> )-5-bromo-2-methyl-3-(2-nitrovinyl)-1 <i>H</i> -indole (3d).....                                   | S32 |
| HRMS spectral charts for 3-(1 <i>H</i> -indol-3-yl)benzofuran-2(3 <i>H</i> )-ones (8aa-8dd).....                                               | S33 |
| HRMS spectral chart for 4,5-Dimethyl-2-(1-(2-methyl-1 <i>H</i> -indol-3-yl)-2-nitroethyl)phenol (9aa):.....                                    | S33 |
| X-Ray crystallography data.....                                                                                                                | S39 |
| References.....                                                                                                                                | S47 |

**$^1\text{H}$  and  $^{13}\text{C}$  NMR spectral charts for (*E*)-5-bromo-2-methyl-3-(2-nitrovinyl)-1*H*-indole (**3d**)**

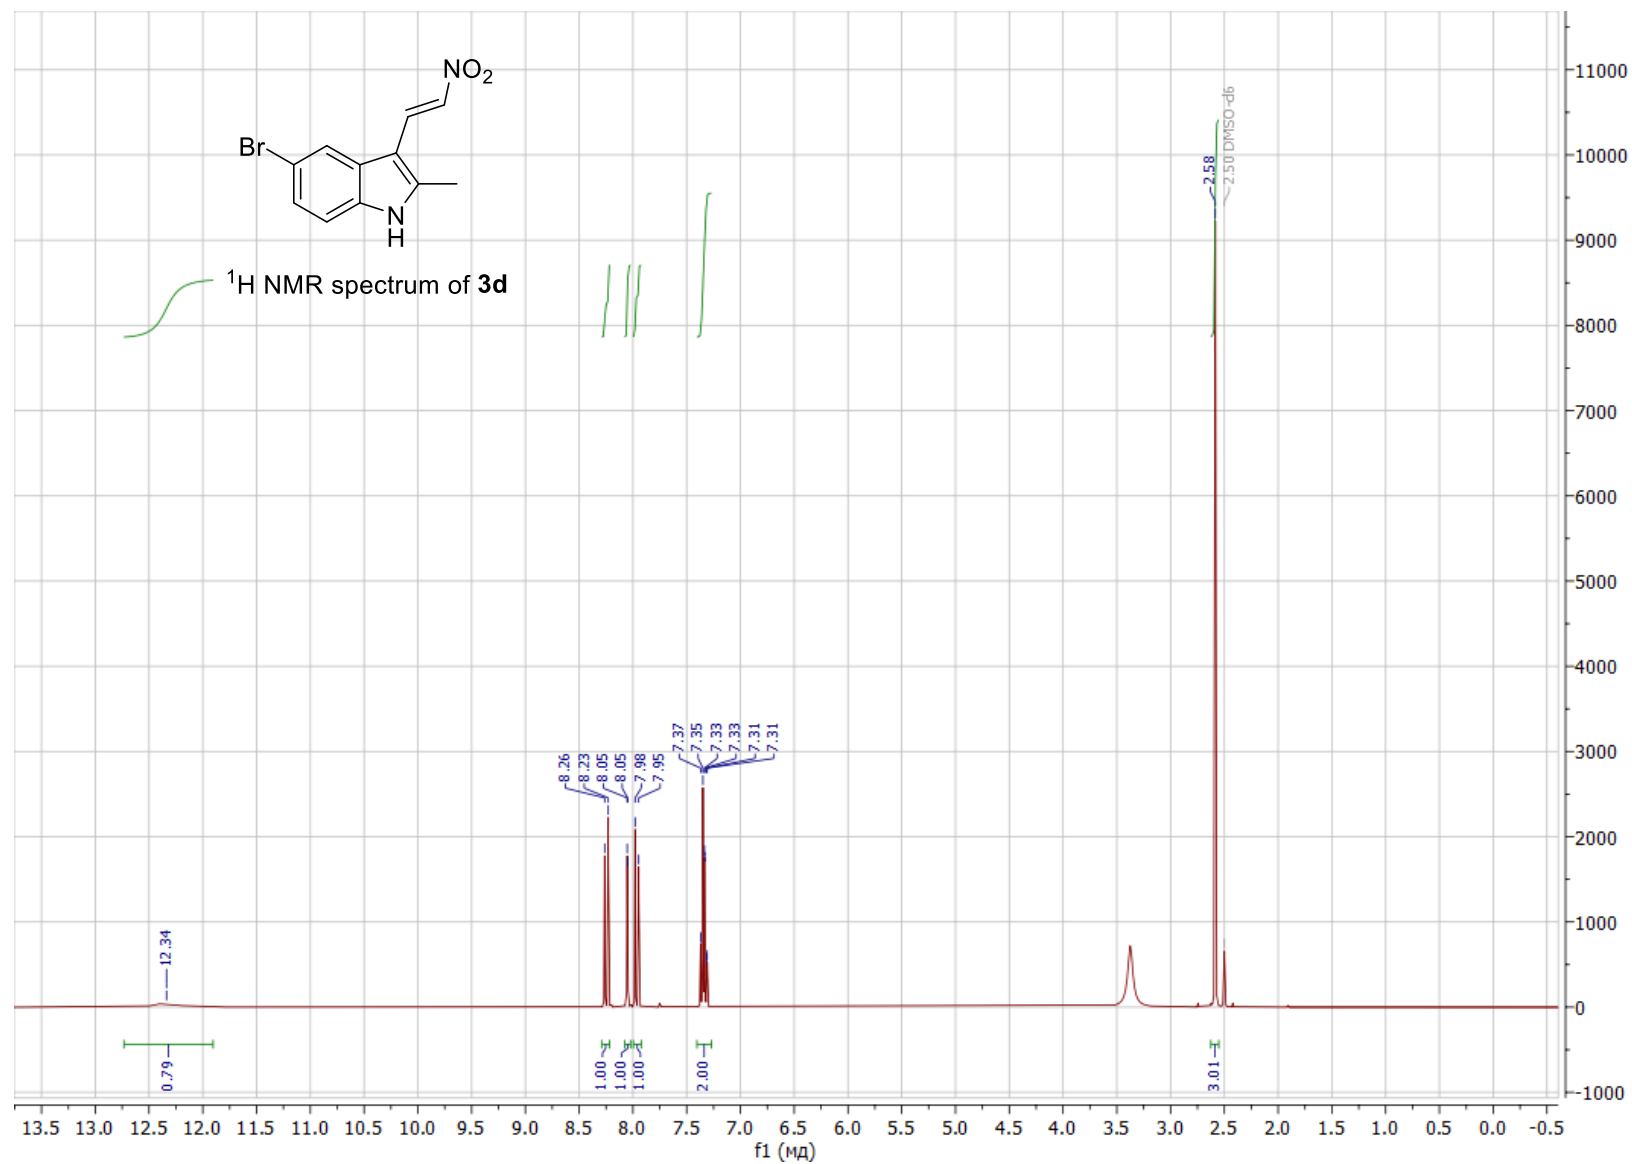

Figure S1.  $^1\text{H}$  NMR spectrum of **3d**

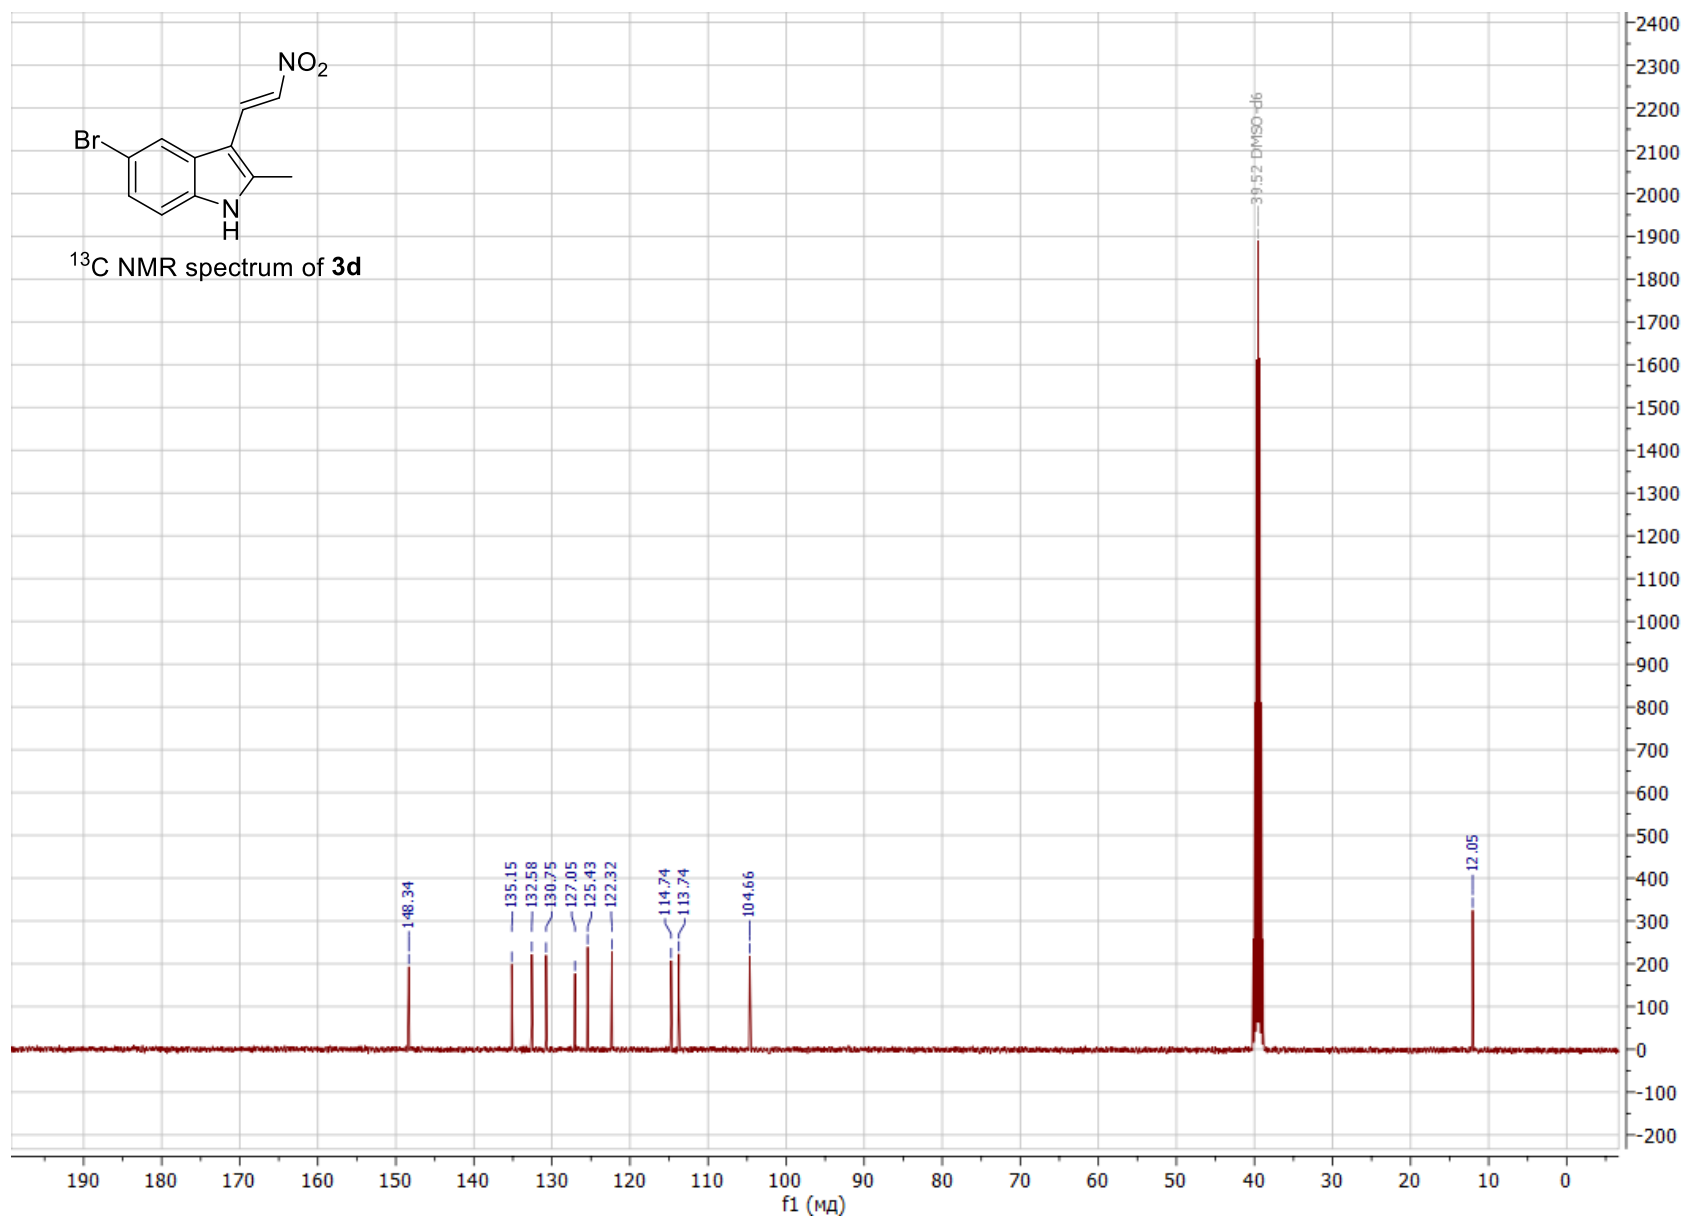

Figure S2. <sup>13</sup>C NMR spectrum of **3d**

**$^1\text{H}$  and  $^{13}\text{C}$  NMR spectral charts for 3-(1*H*-indol-3-yl)benzofuran-2(3*H*)-ones (8aa-8dd)**

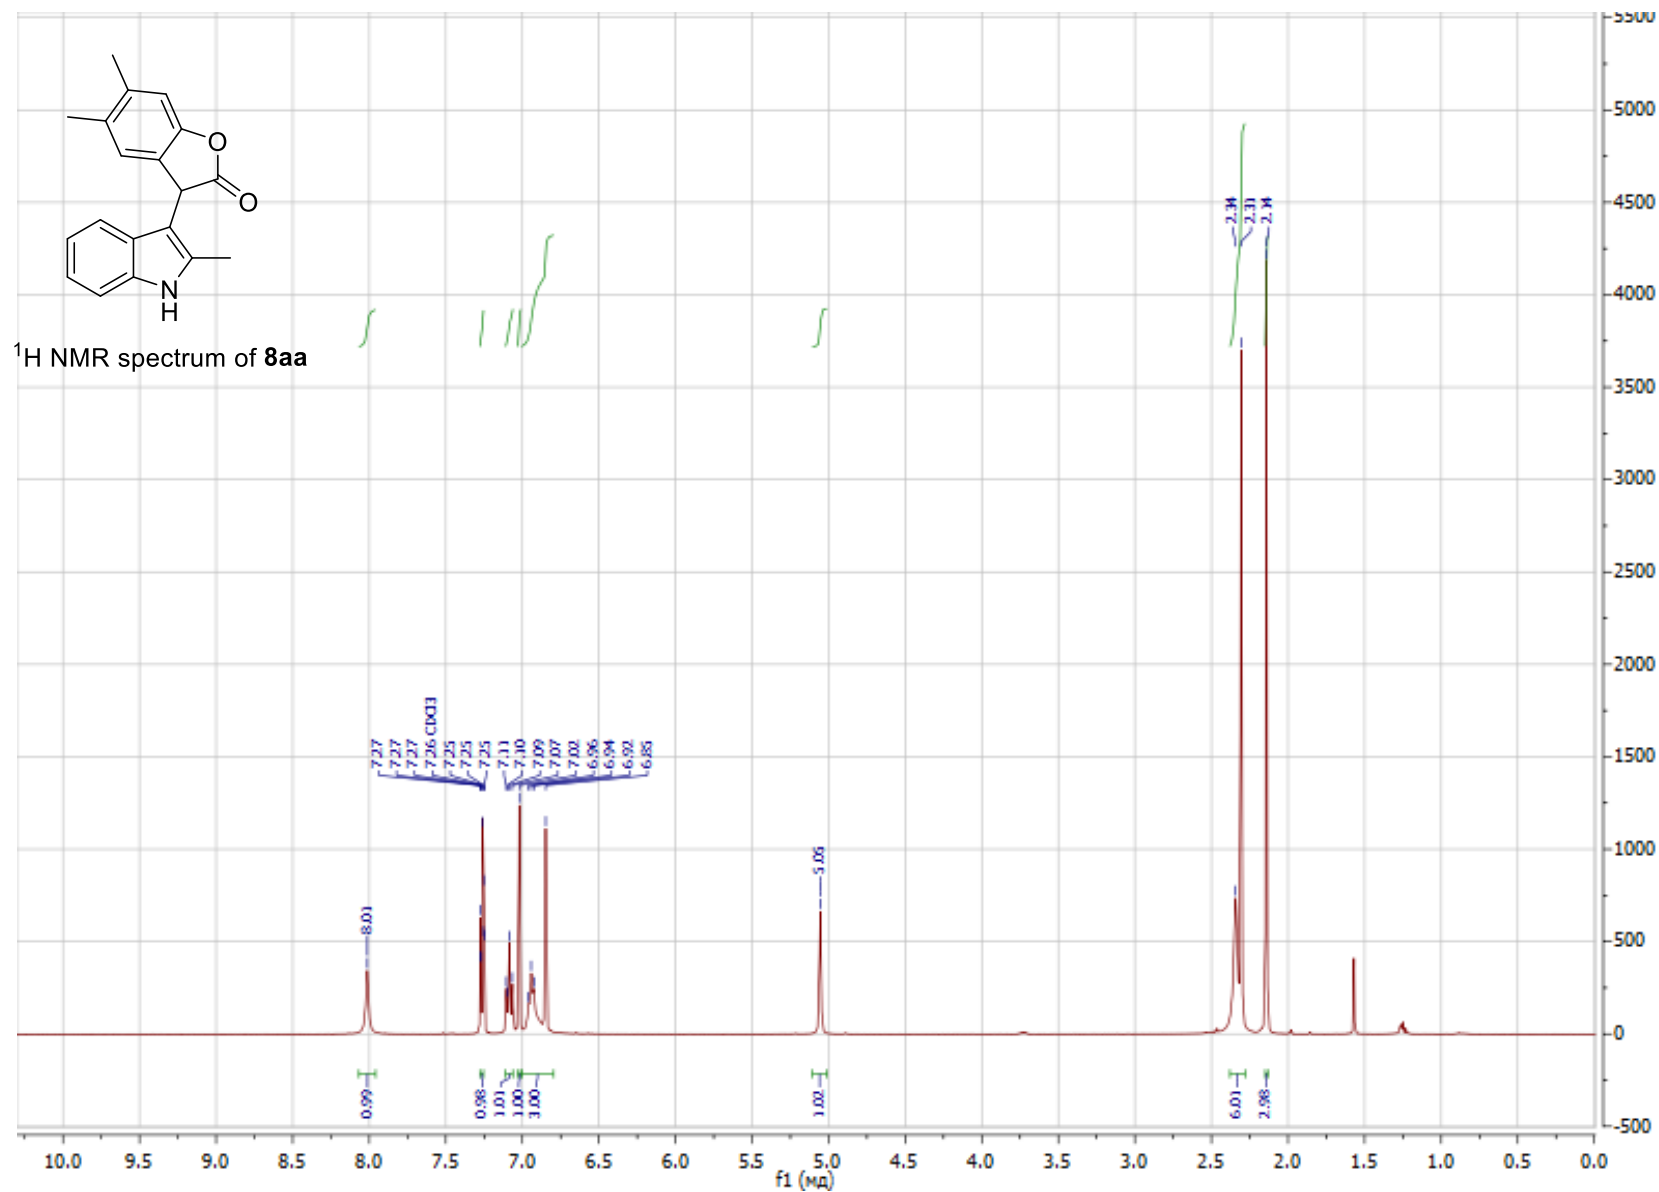

Figure S3.  $^1\text{H}$  NMR spectrum of **8aa**

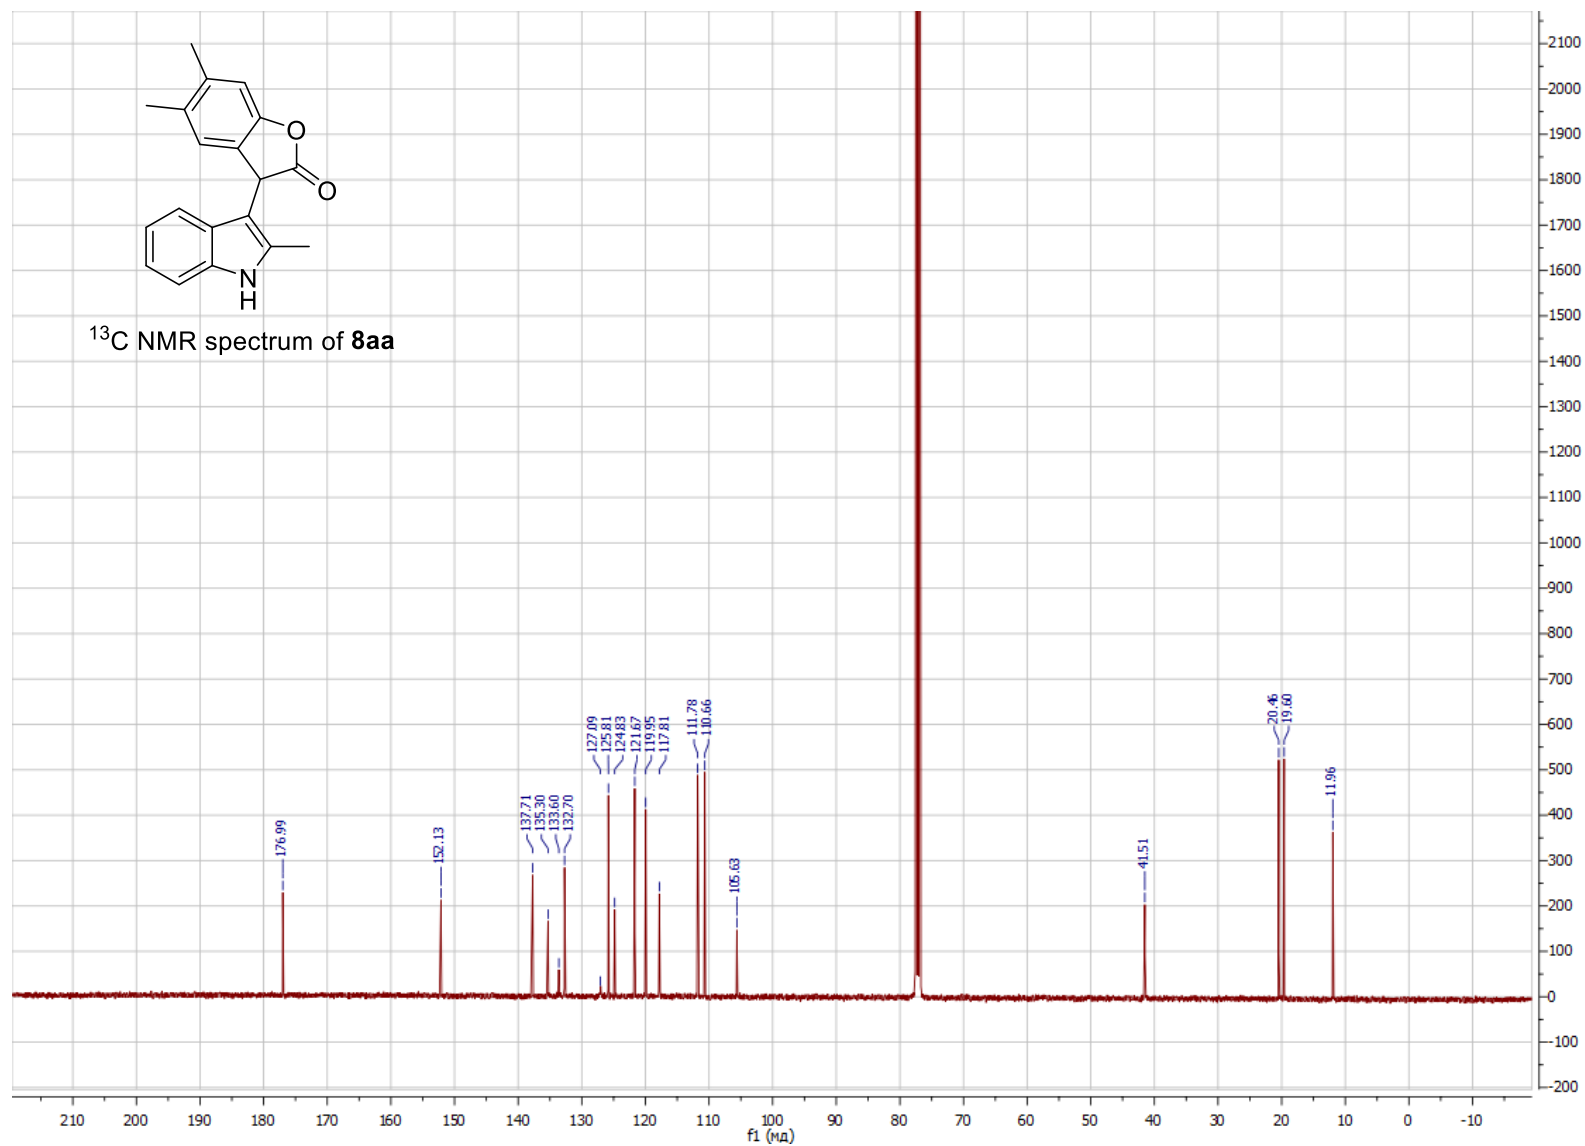

Figure S4. <sup>13</sup>C NMR spectrum of **8aa**

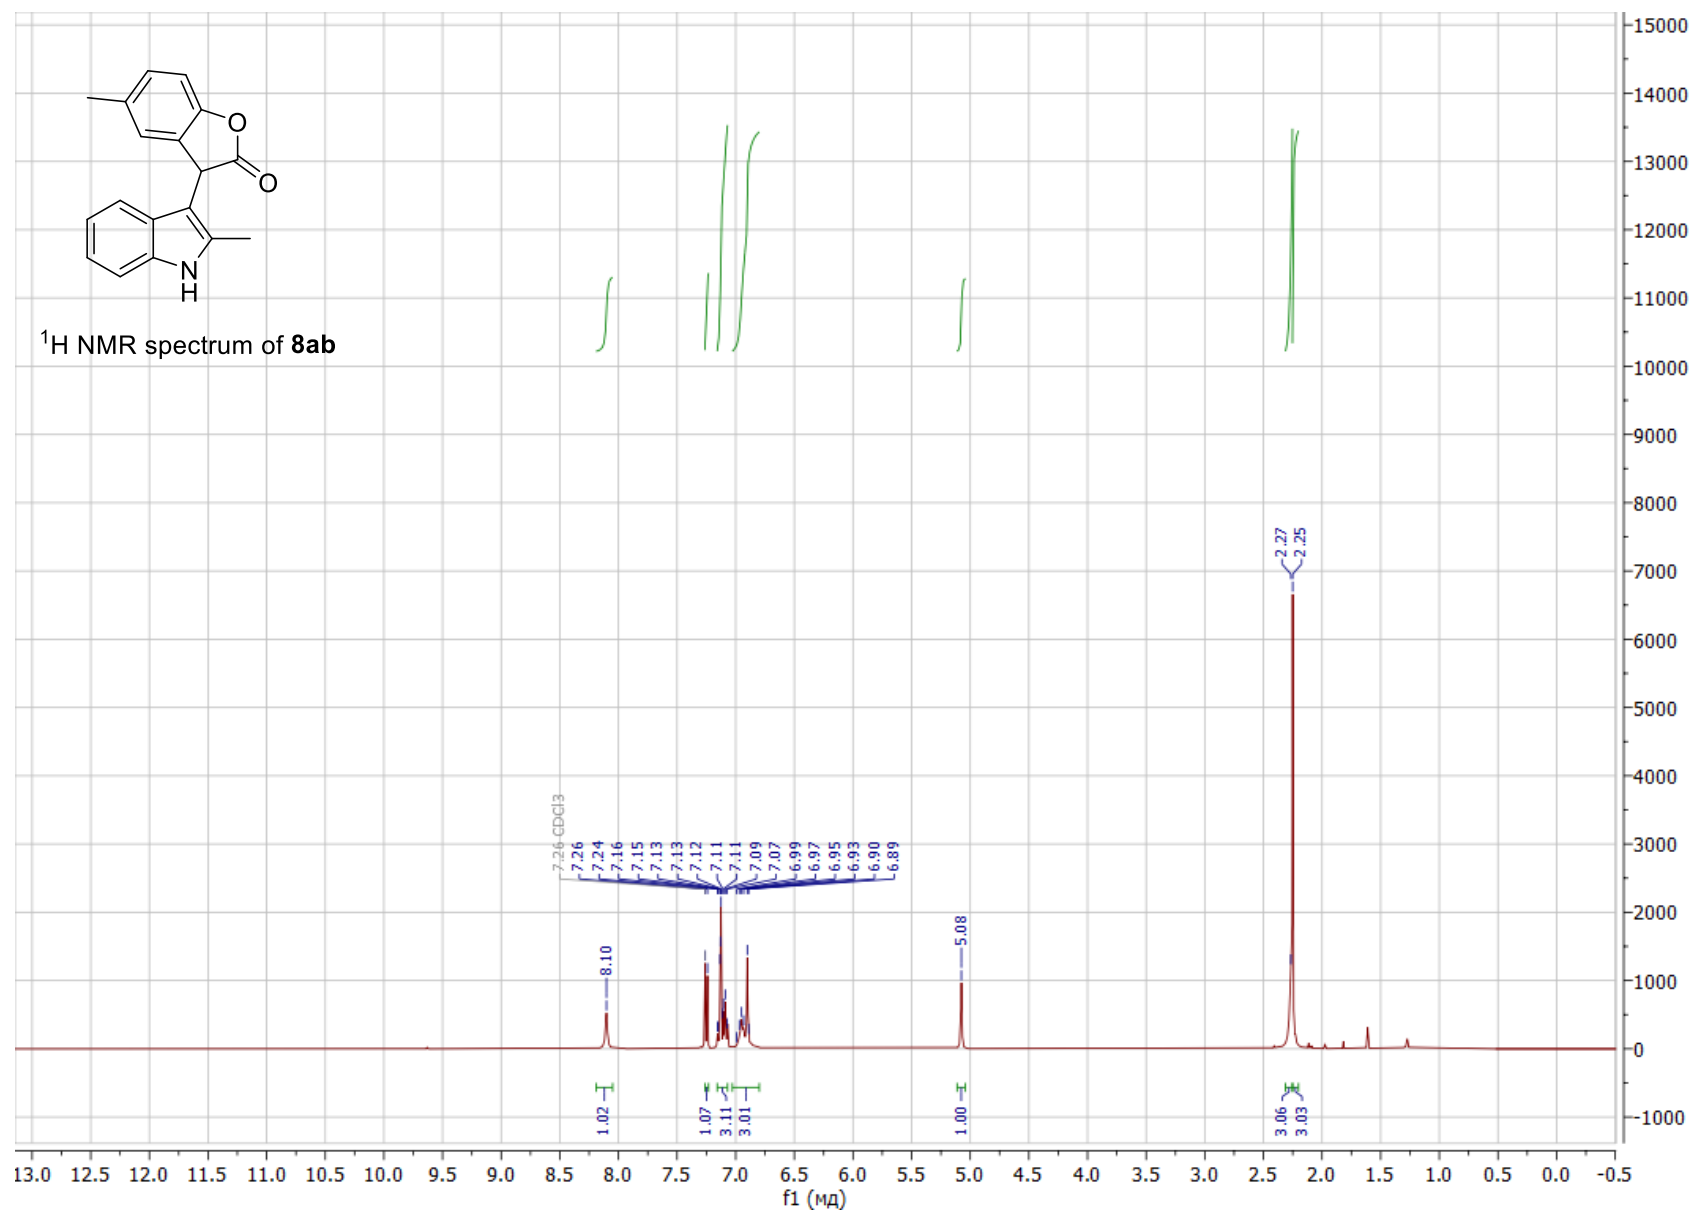

Figure S5. <sup>1</sup>H NMR spectrum of **8ab**

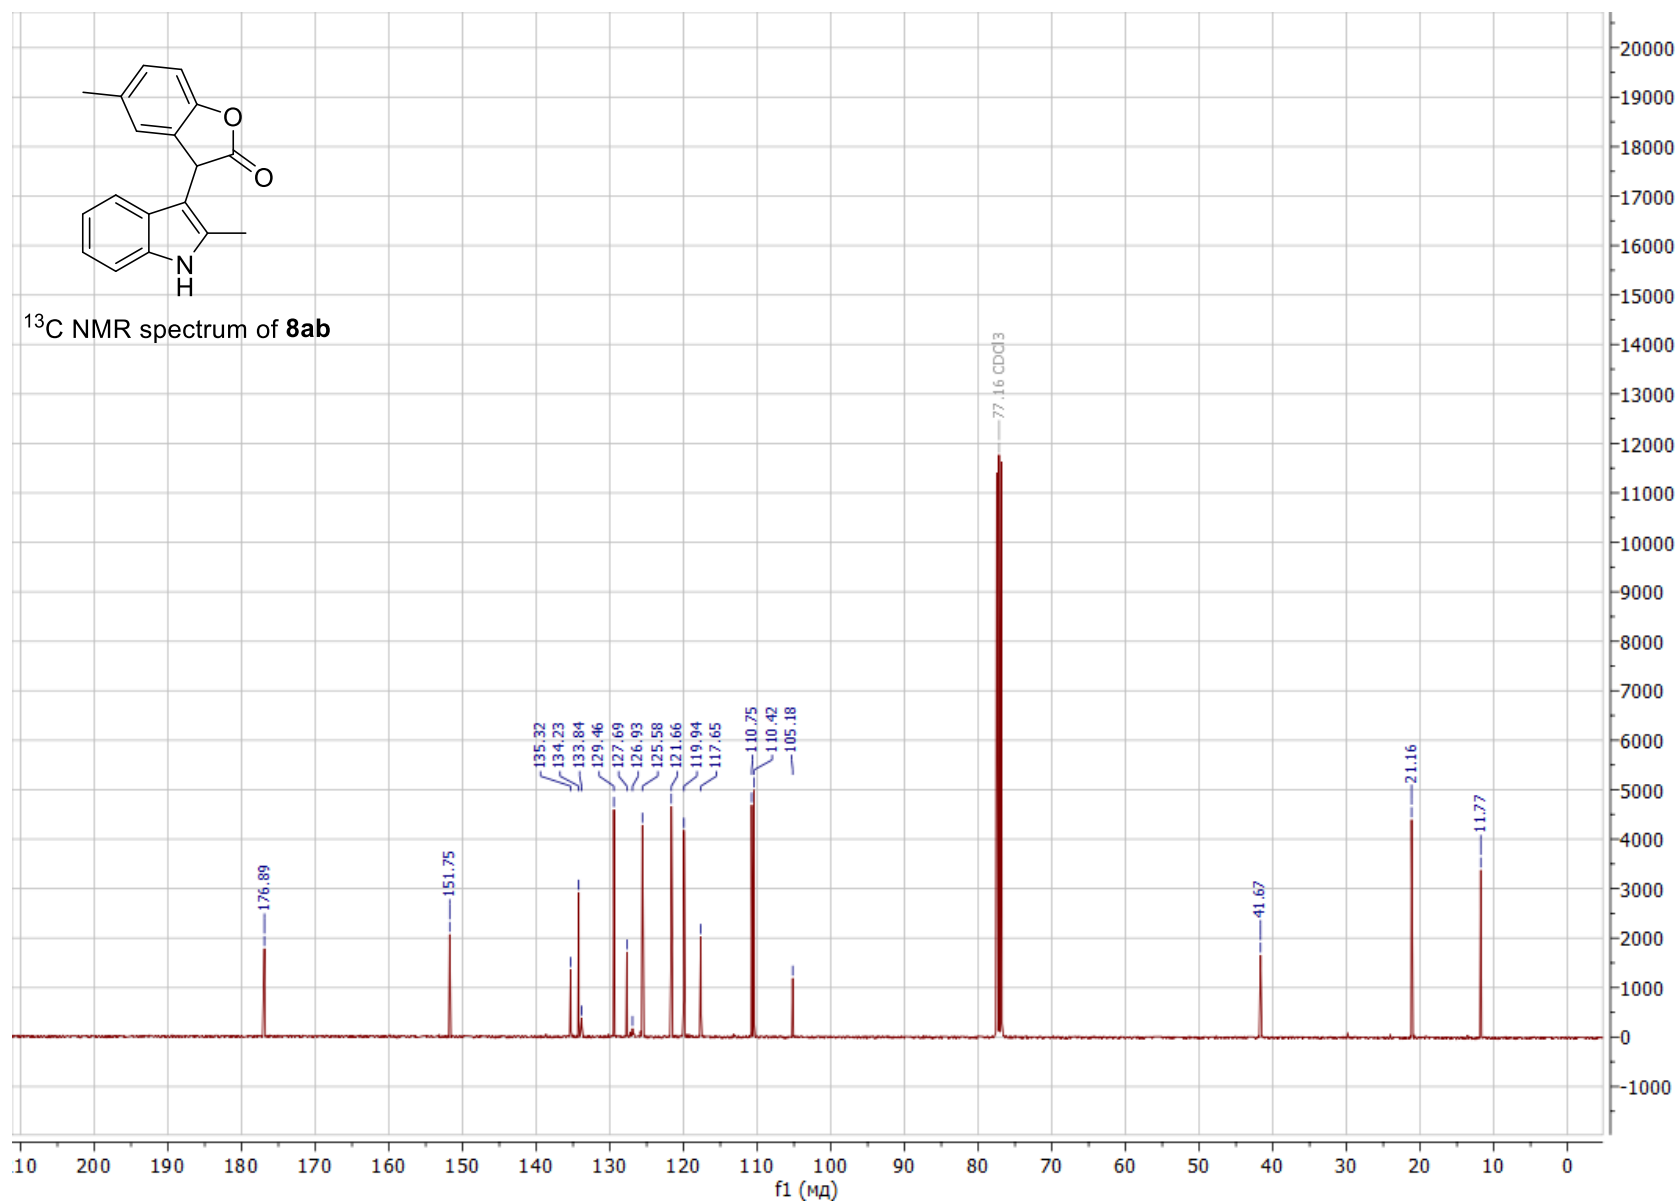

Figure S6.  $^{13}\text{C}$  NMR spectrum of **8ab**

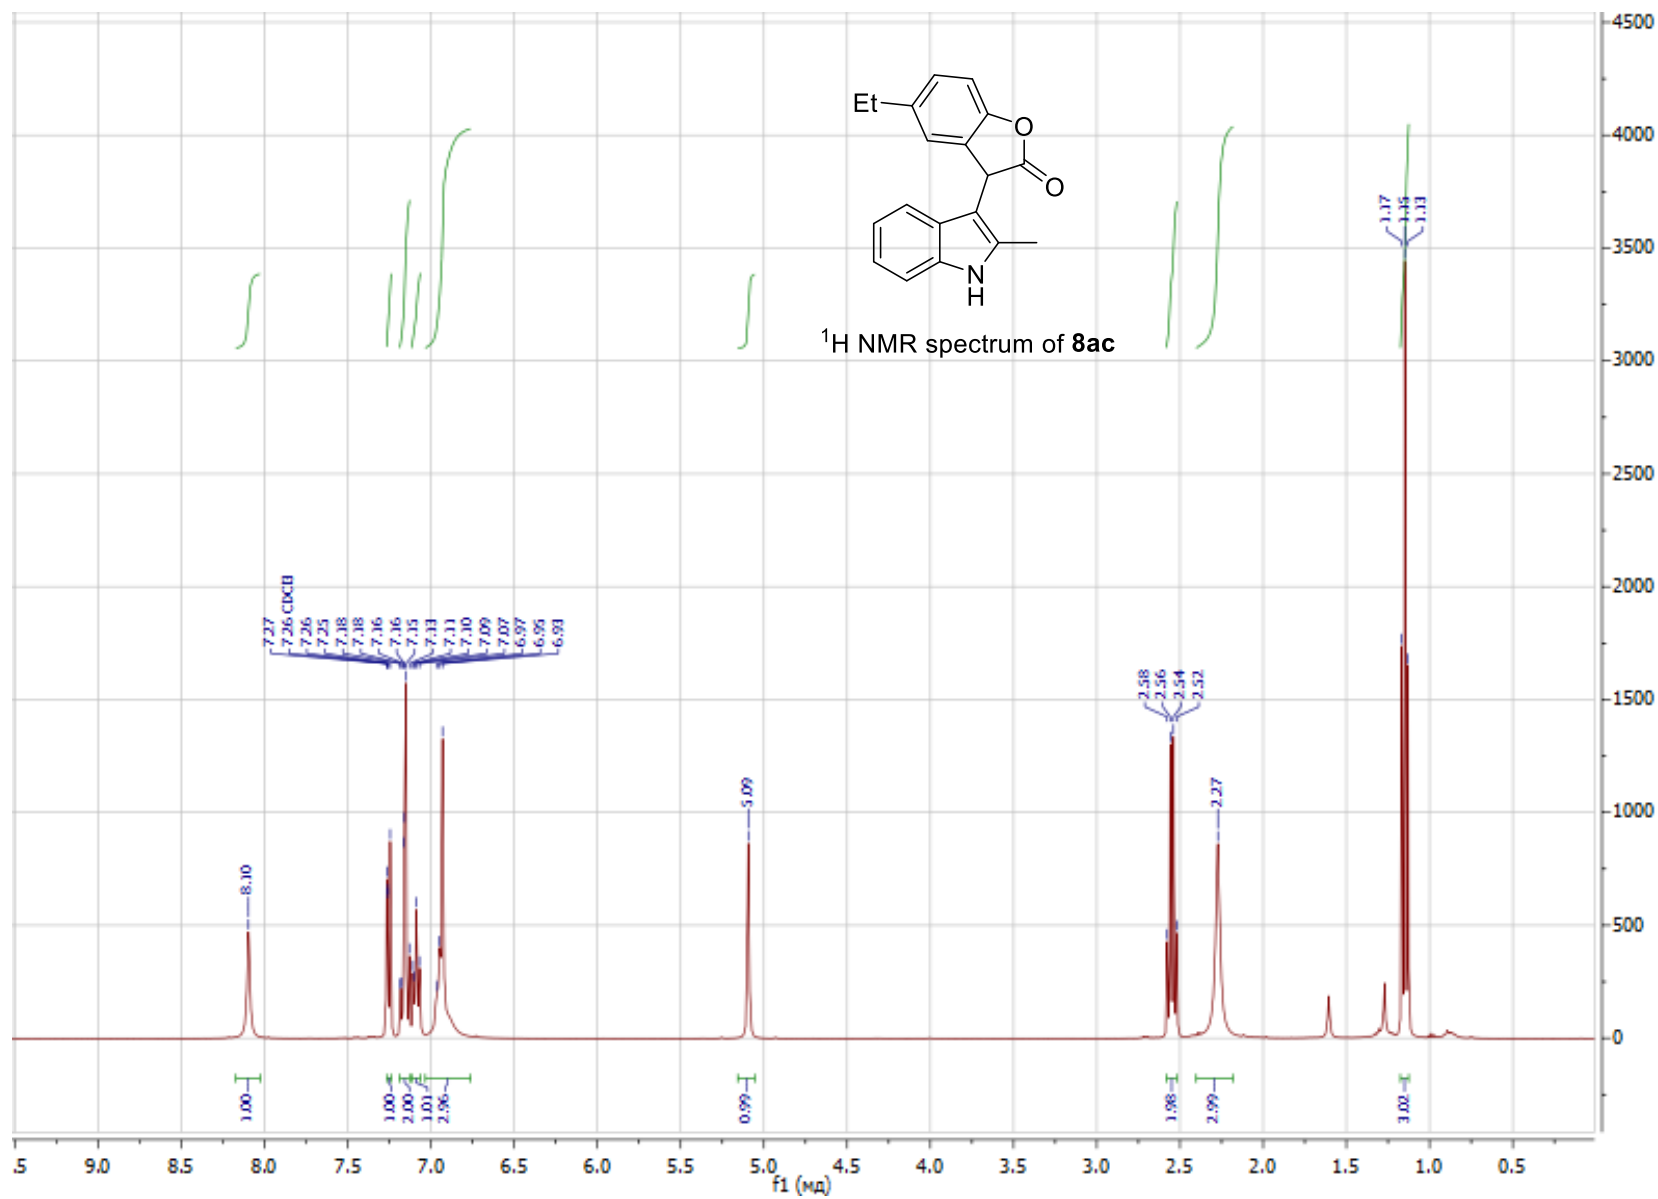

Figure S7. <sup>1</sup>H NMR spectrum of **8ac**



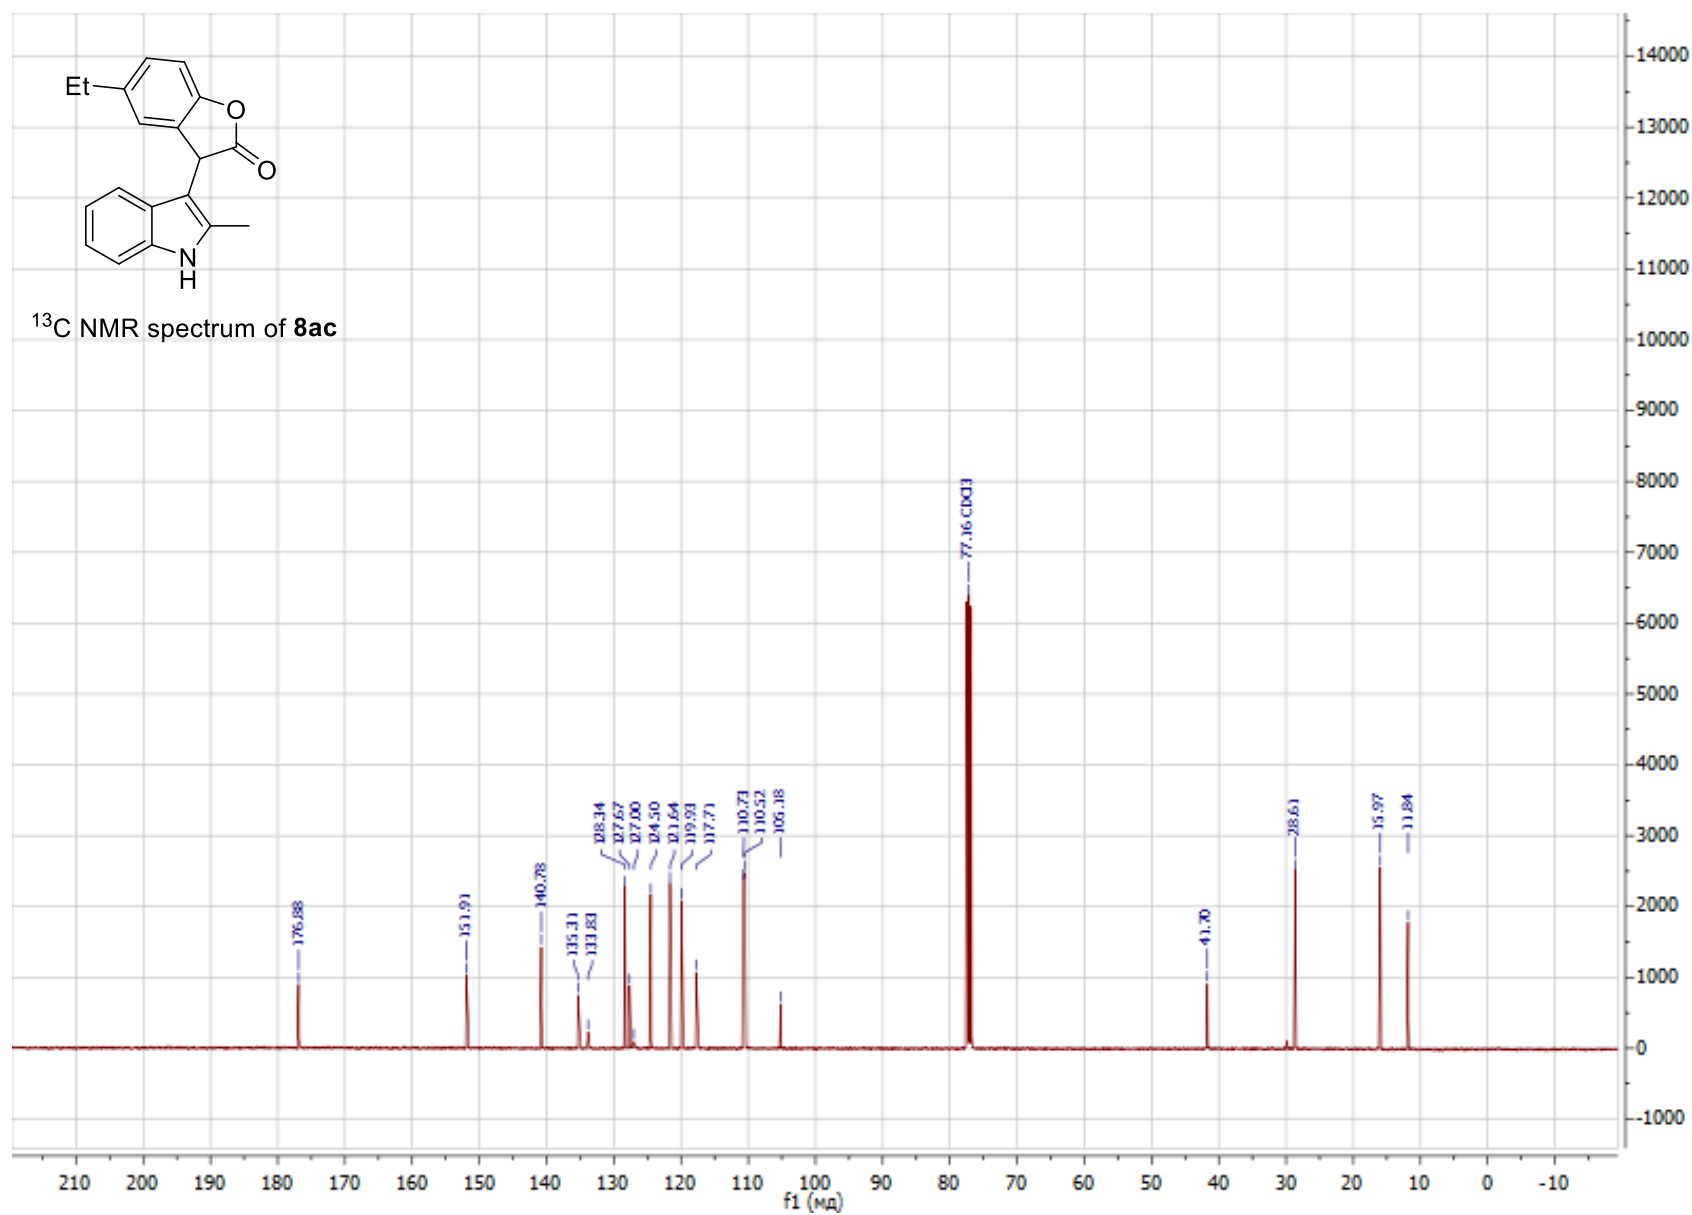

Figure S8.  $^{13}\text{C}$  NMR spectrum of **8ac**

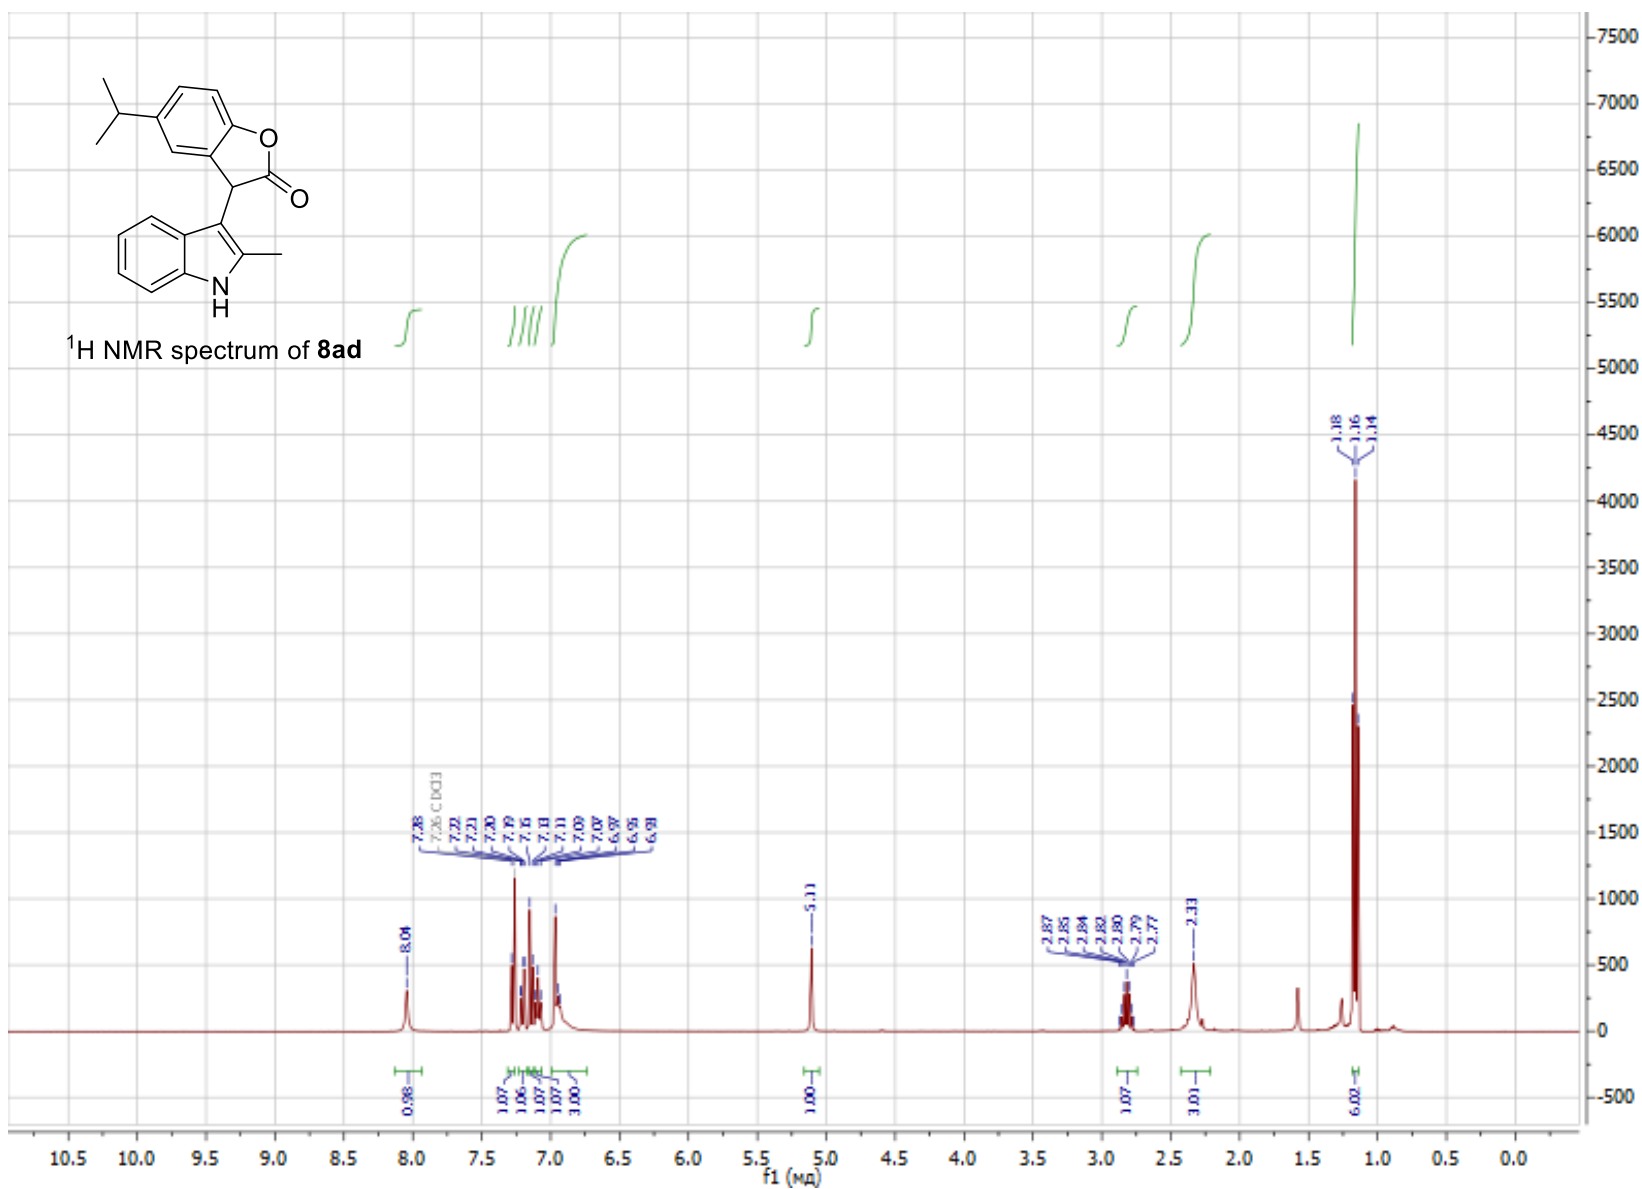

Figure S9. <sup>1</sup>H NMR spectrum of **8ad**

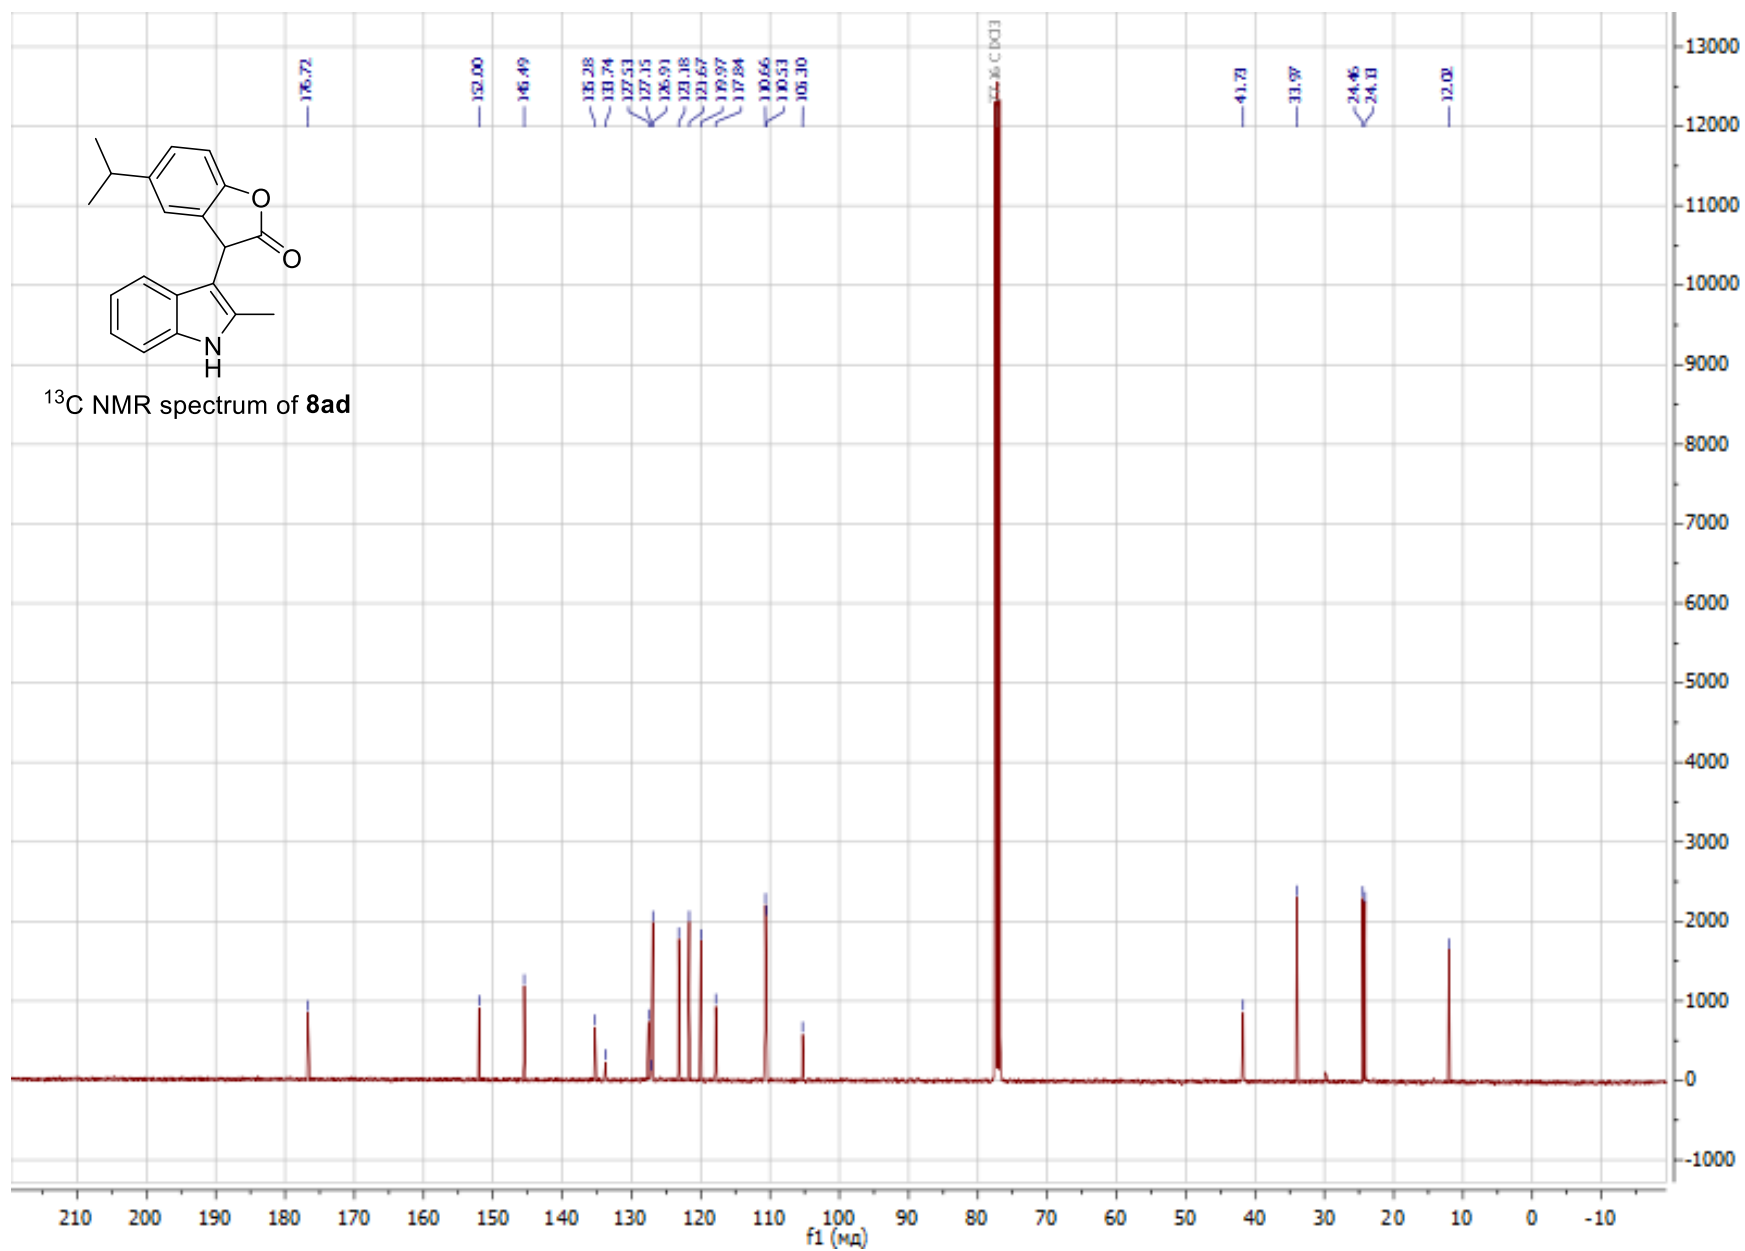

Figure S10. <sup>13</sup>C NMR spectrum of **8ad**

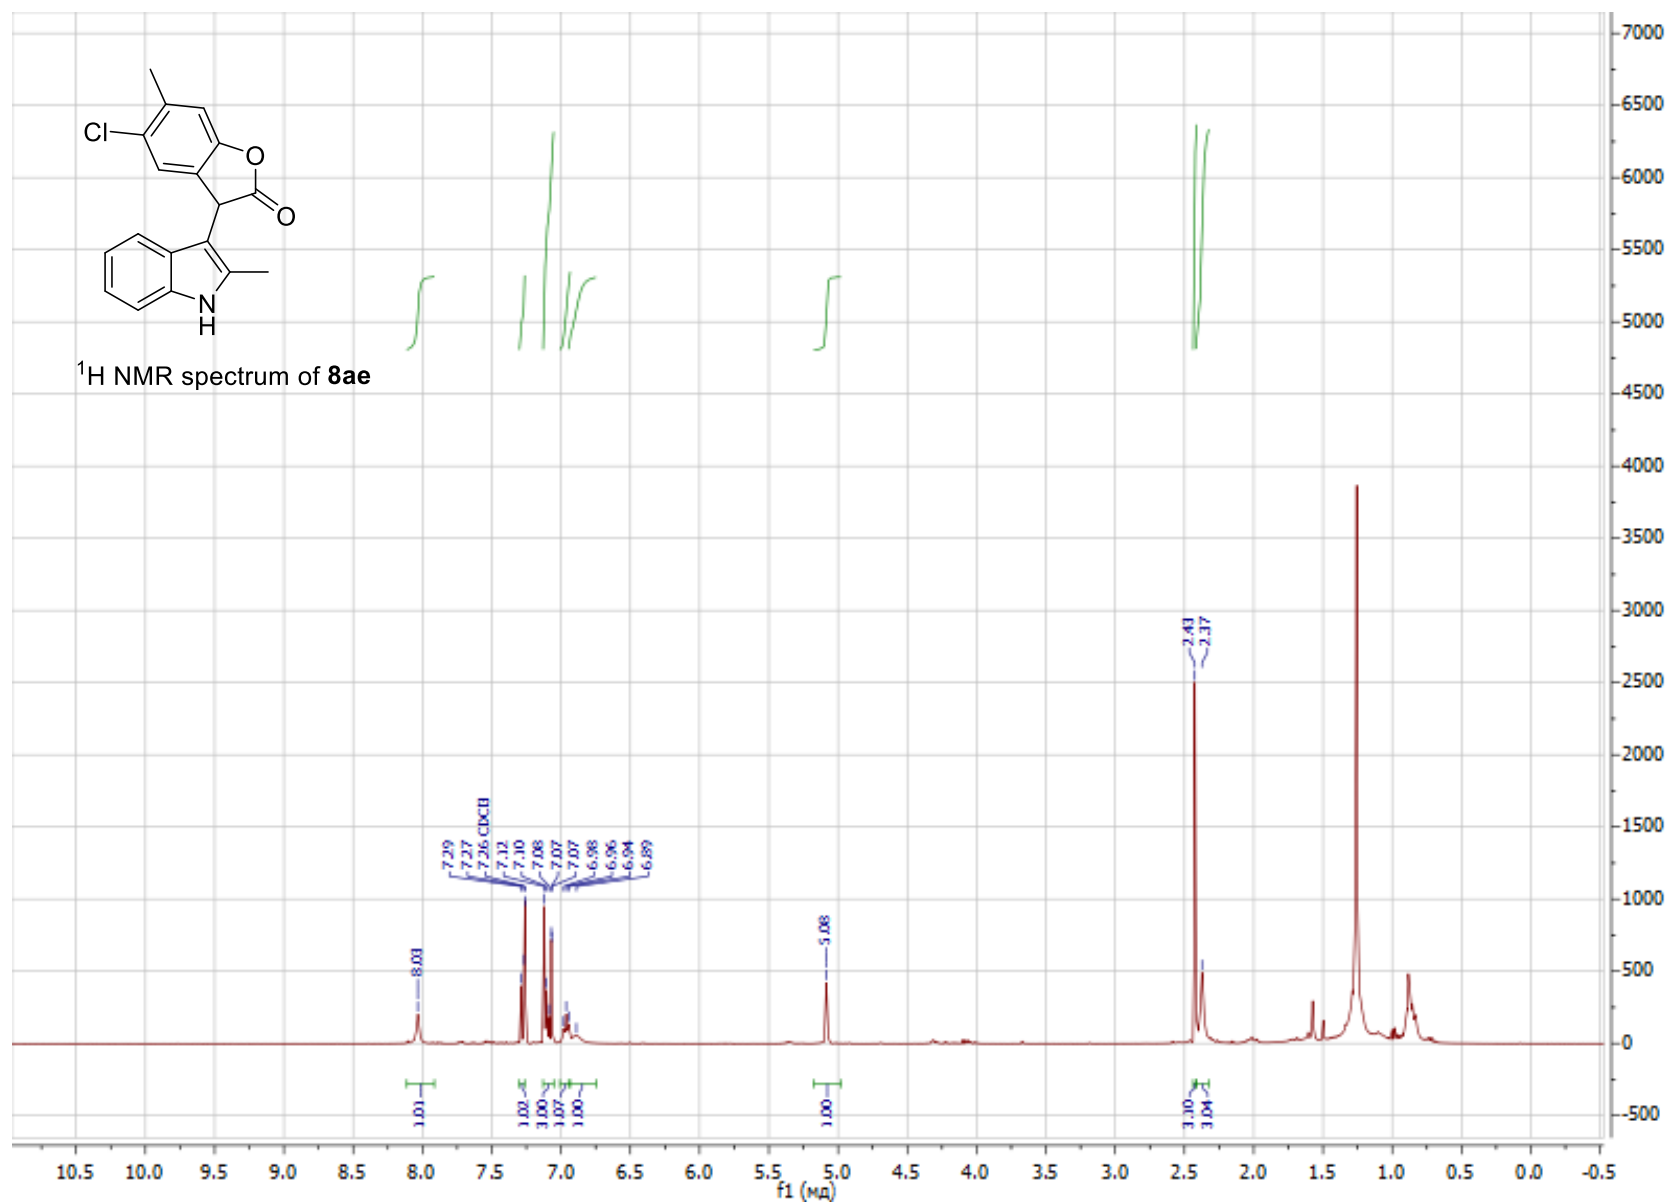

Figure S11. <sup>1</sup>H NMR spectrum of **8ae**

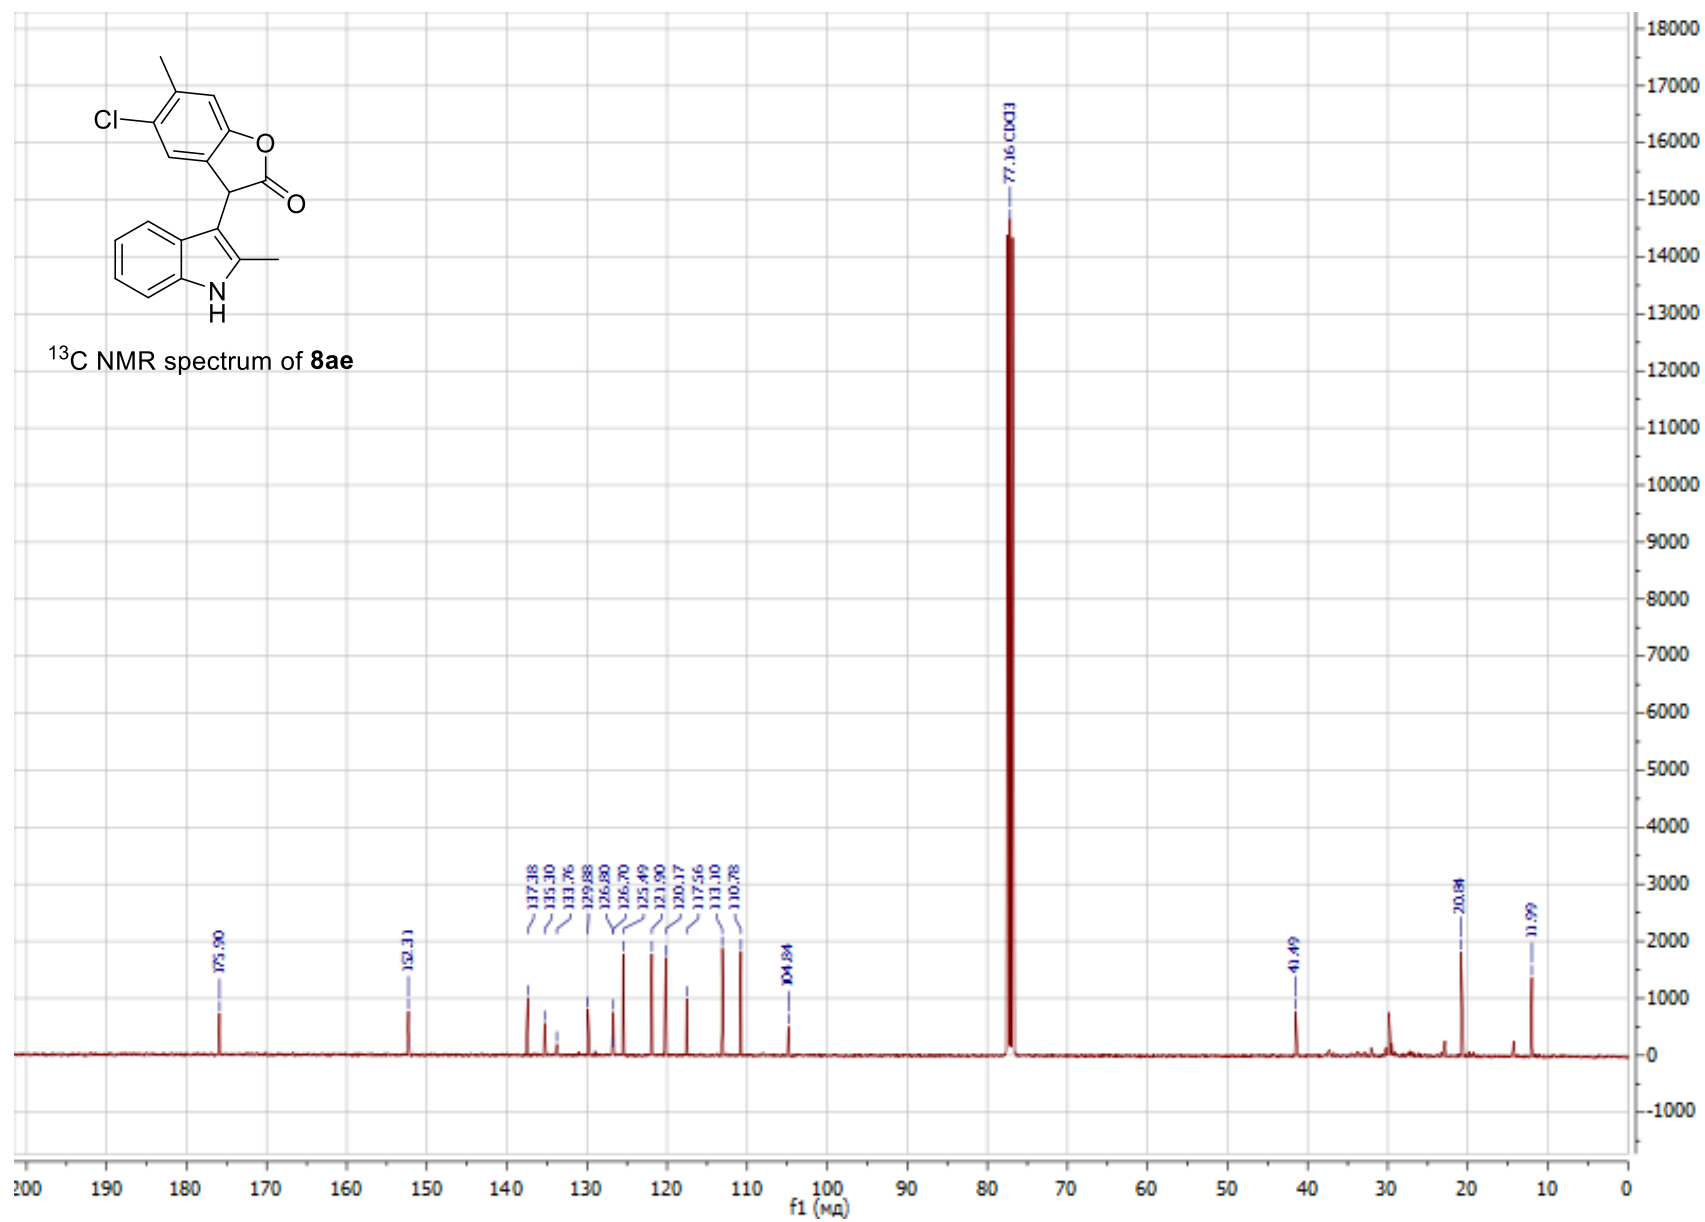

Figure S12.  $^{13}\text{C}$  NMR spectrum of **8ae**

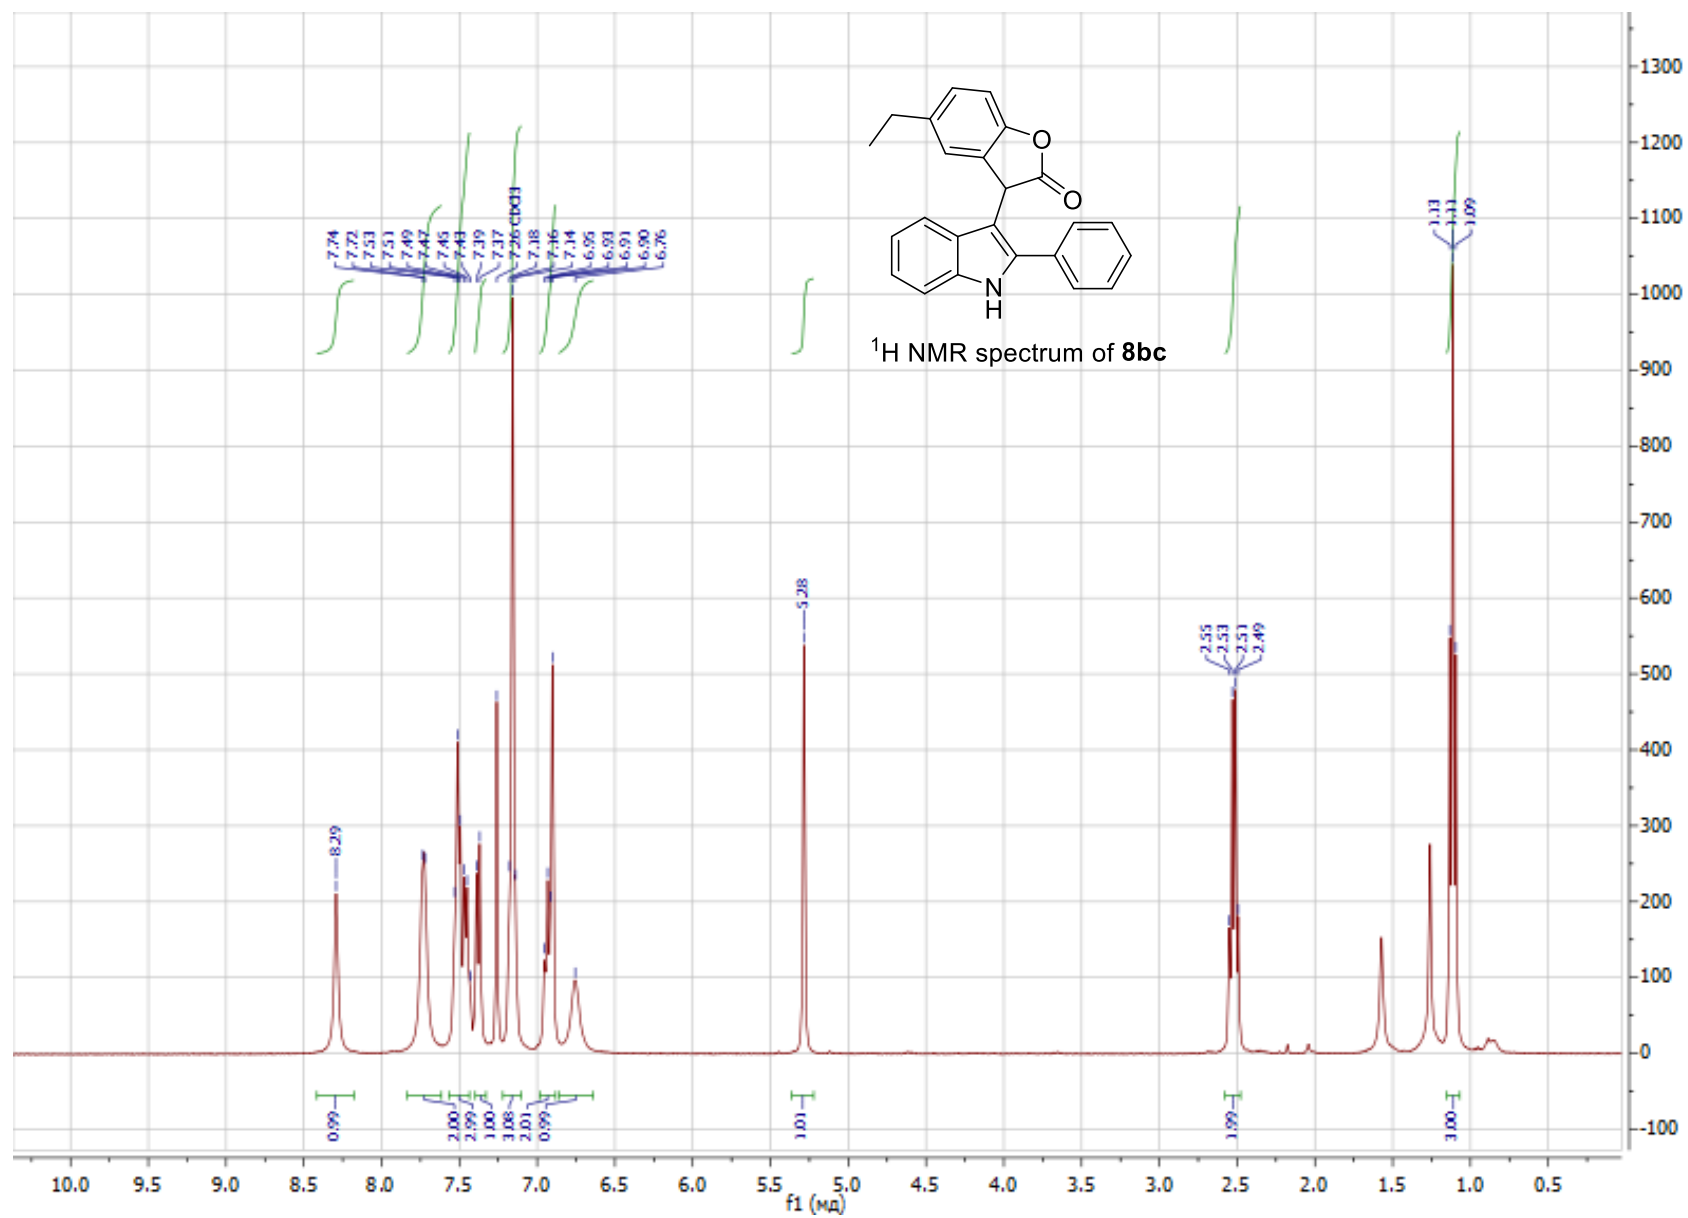

Figure S13. <sup>1</sup>H NMR spectrum of **8bc**

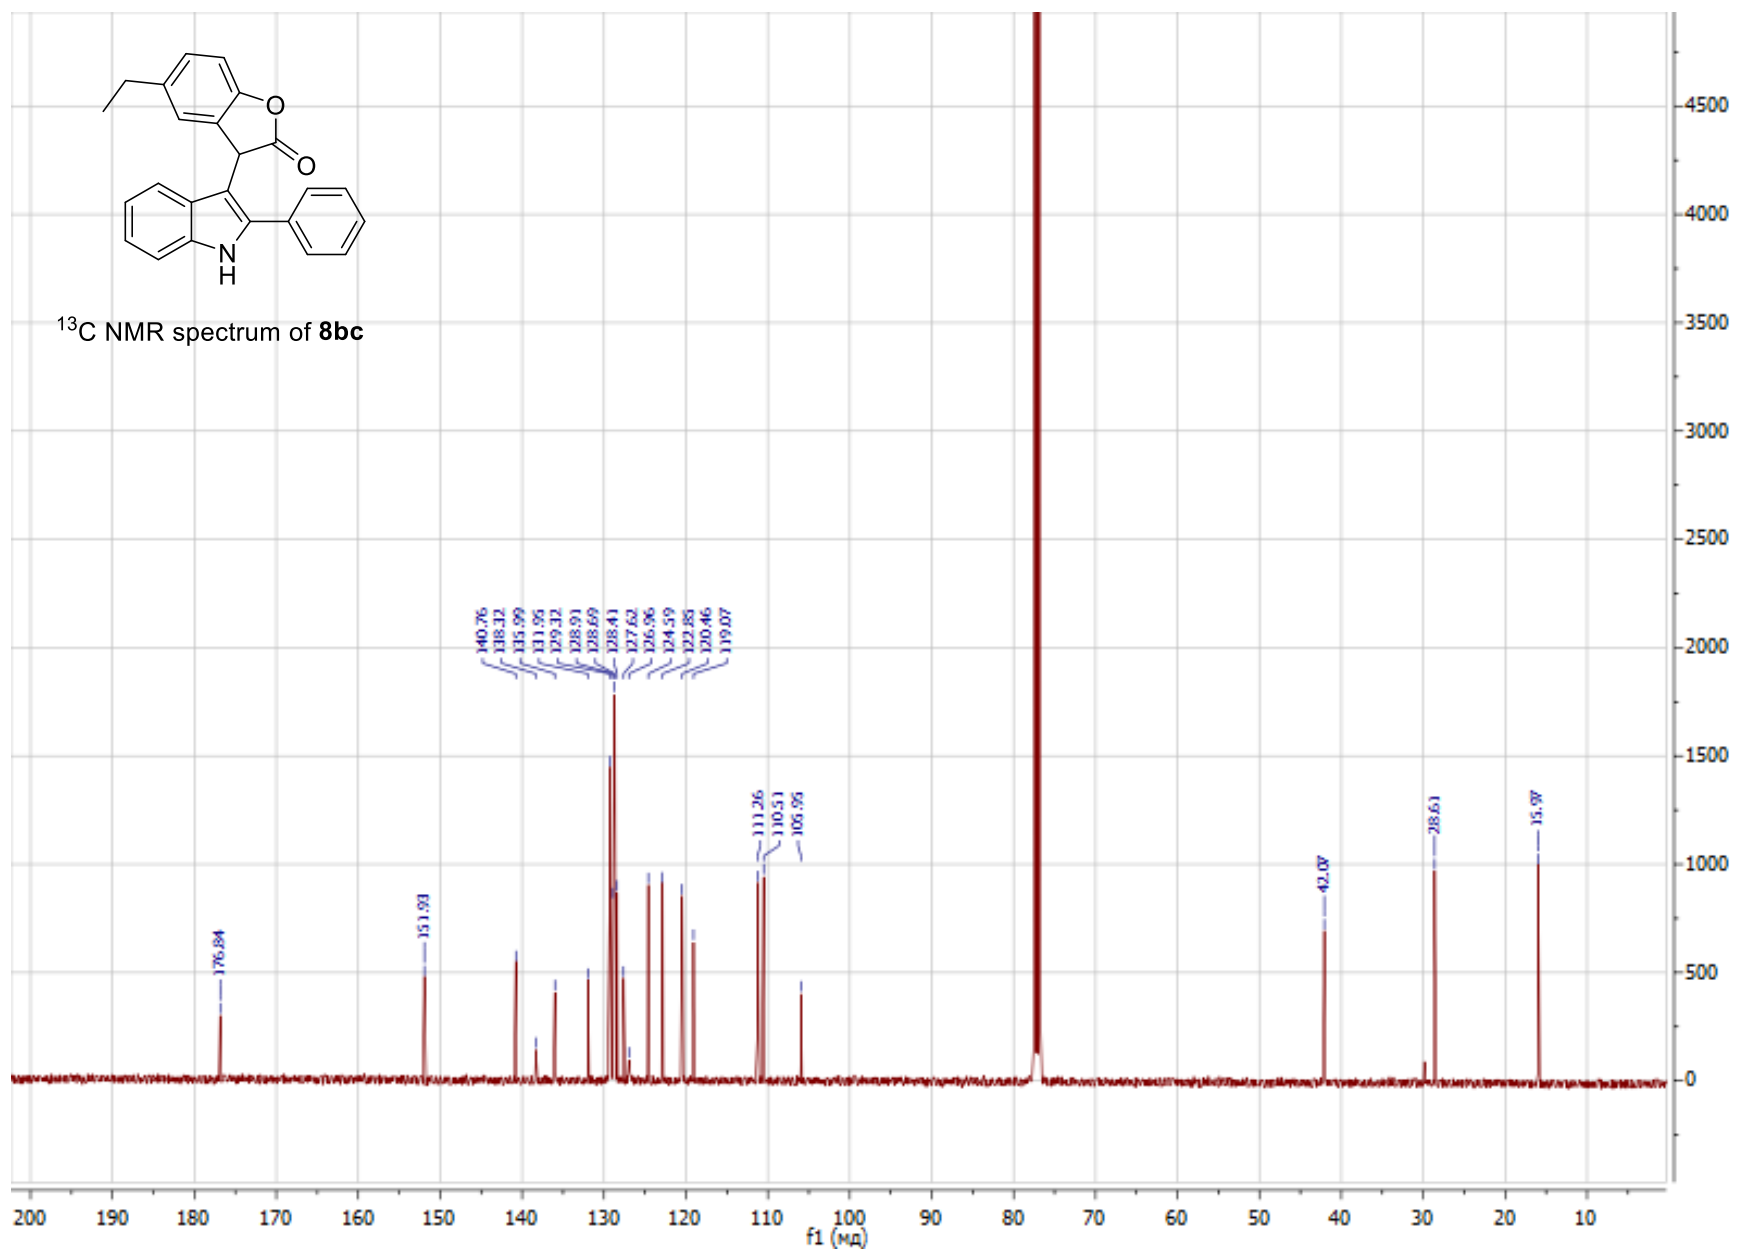

Figure S14.  $^{13}\text{C}$  NMR spectrum of **8bc**

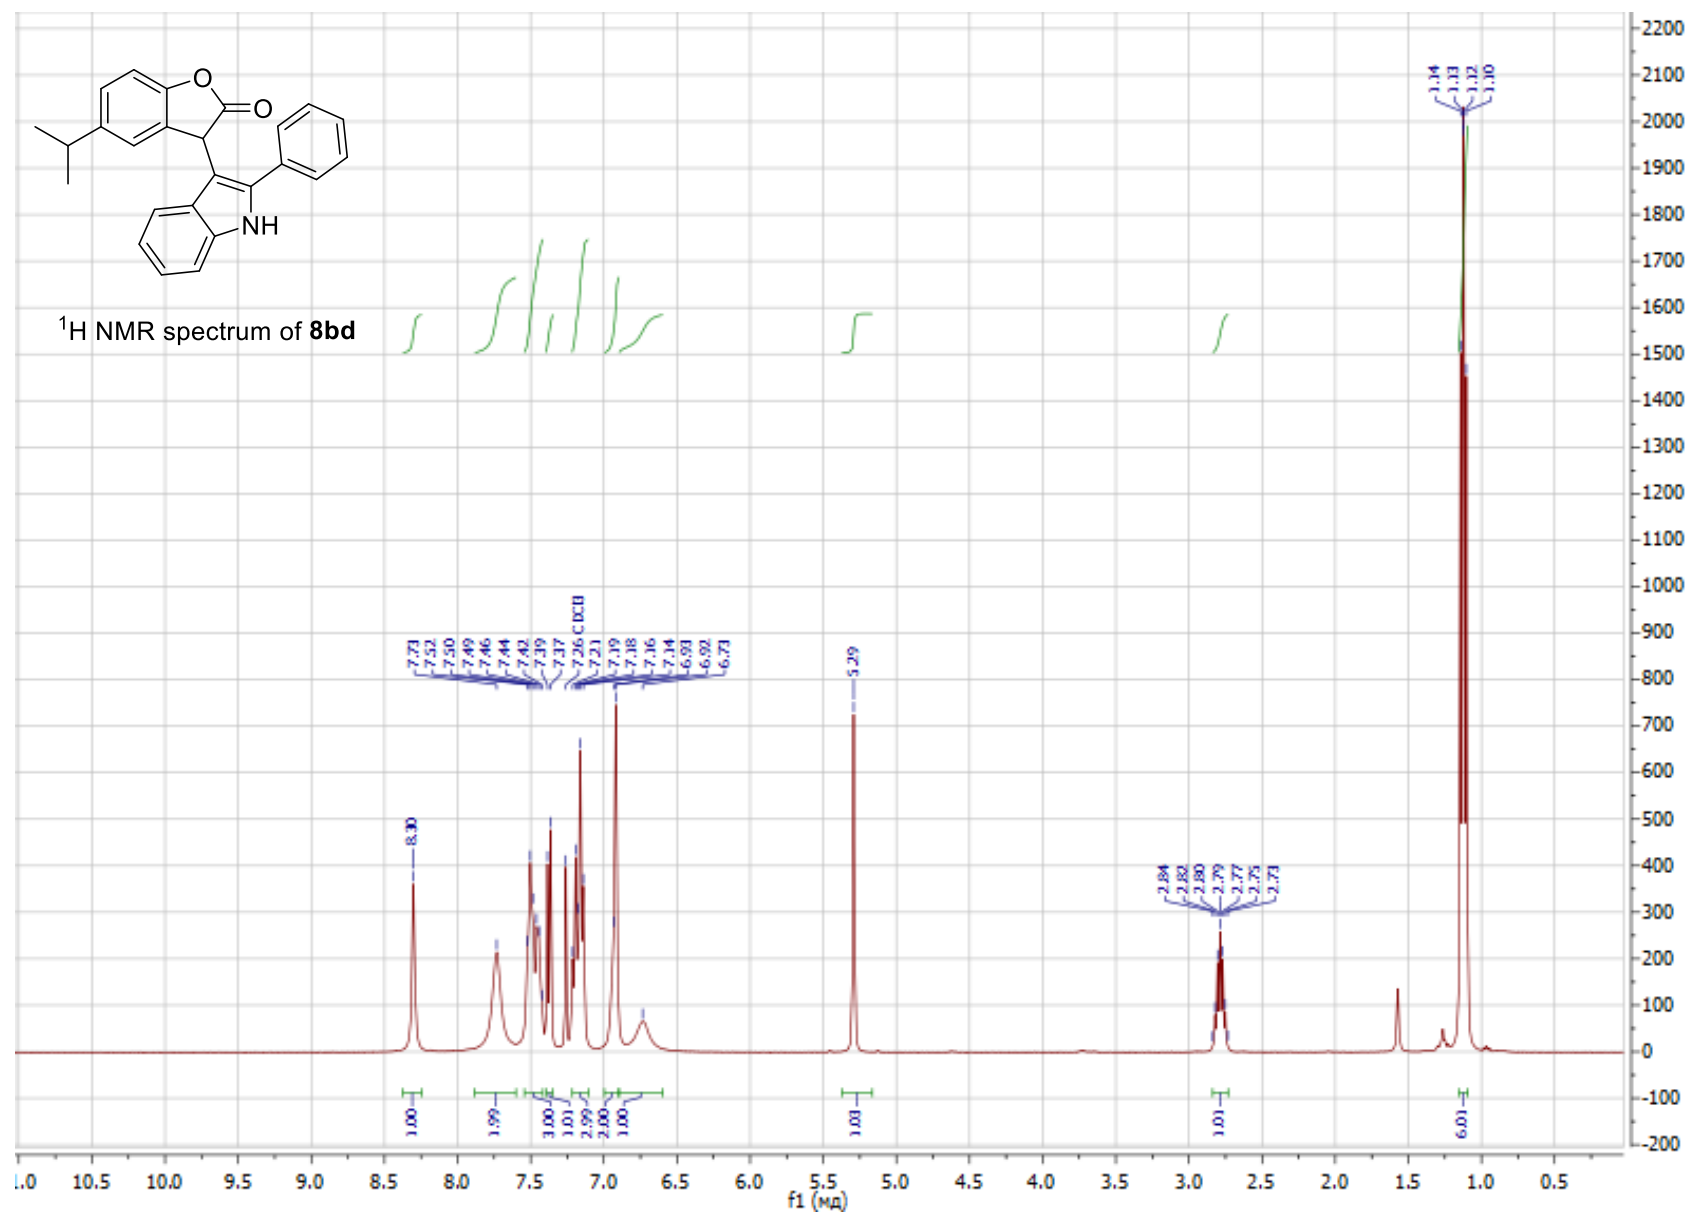

Figure S15. <sup>1</sup>H NMR spectrum of **8bd**



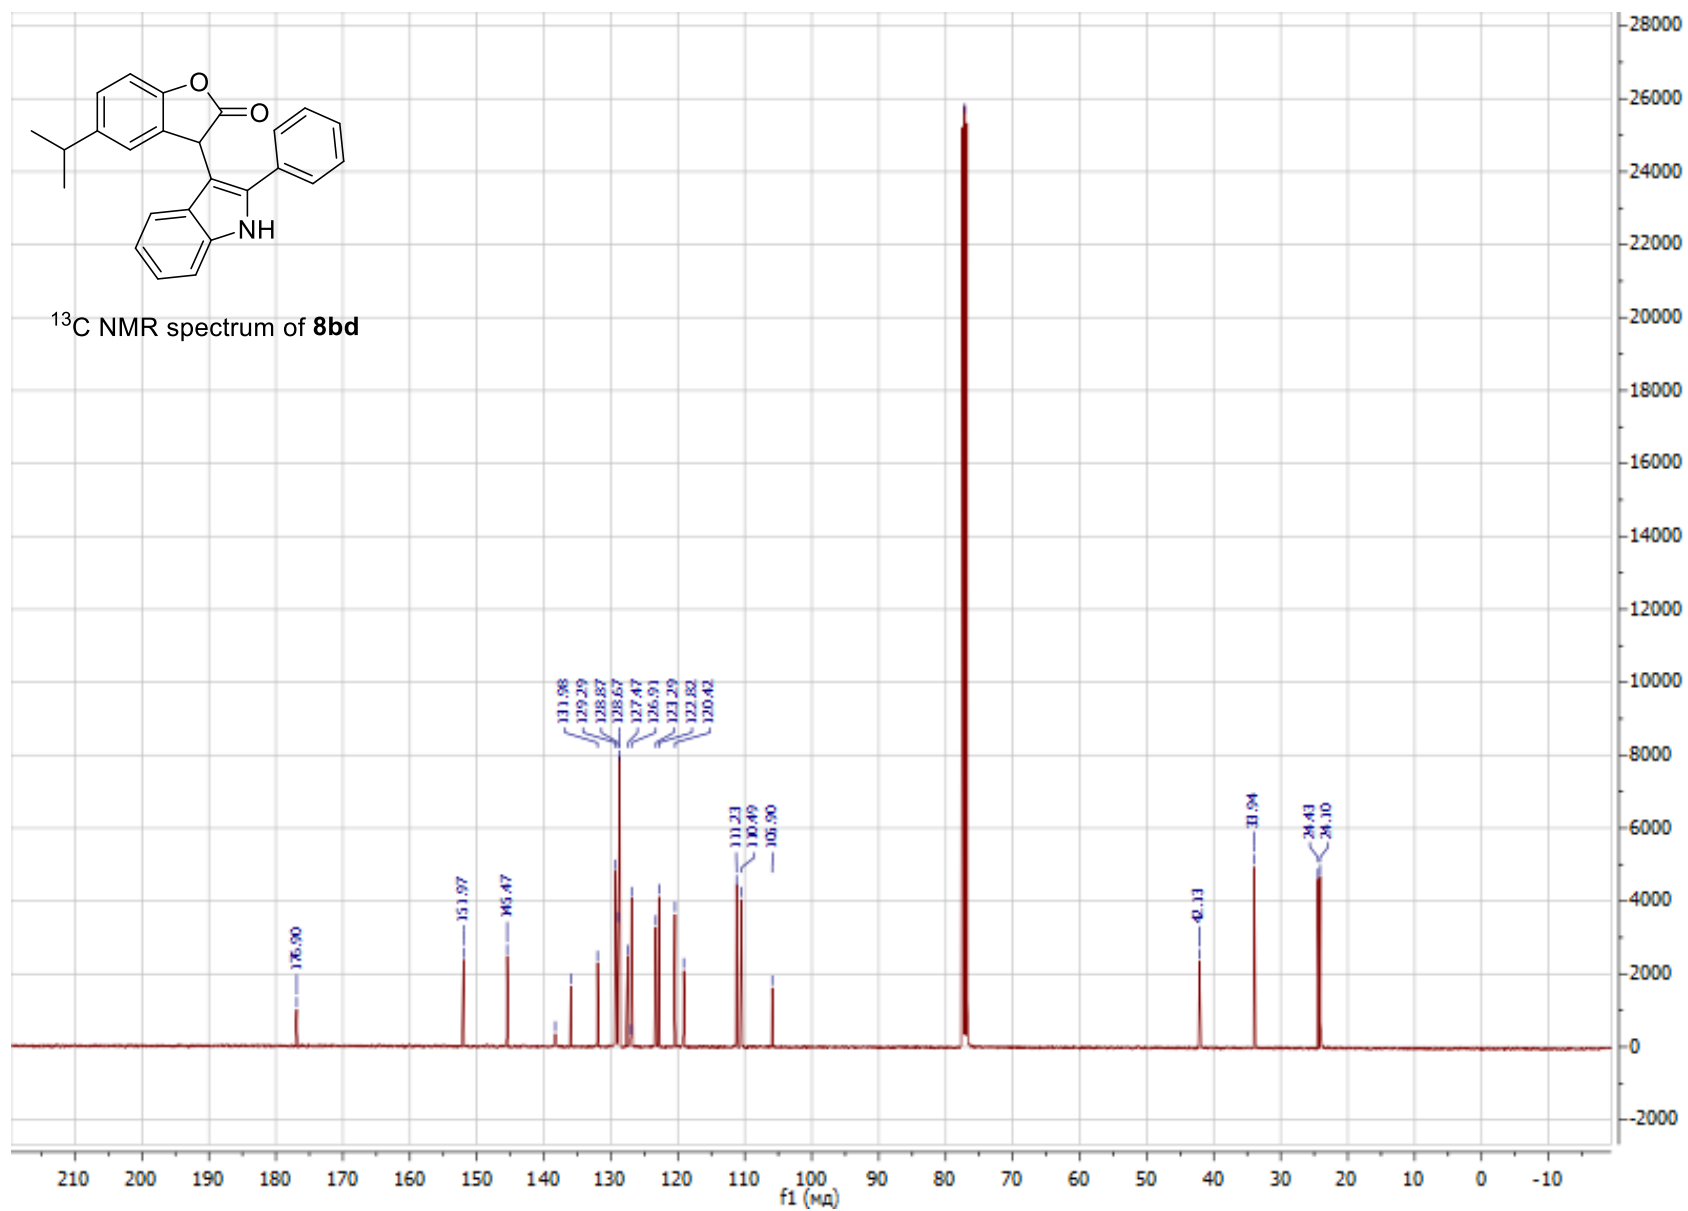

Figure S16. <sup>13</sup>C NMR spectrum of **8bd**

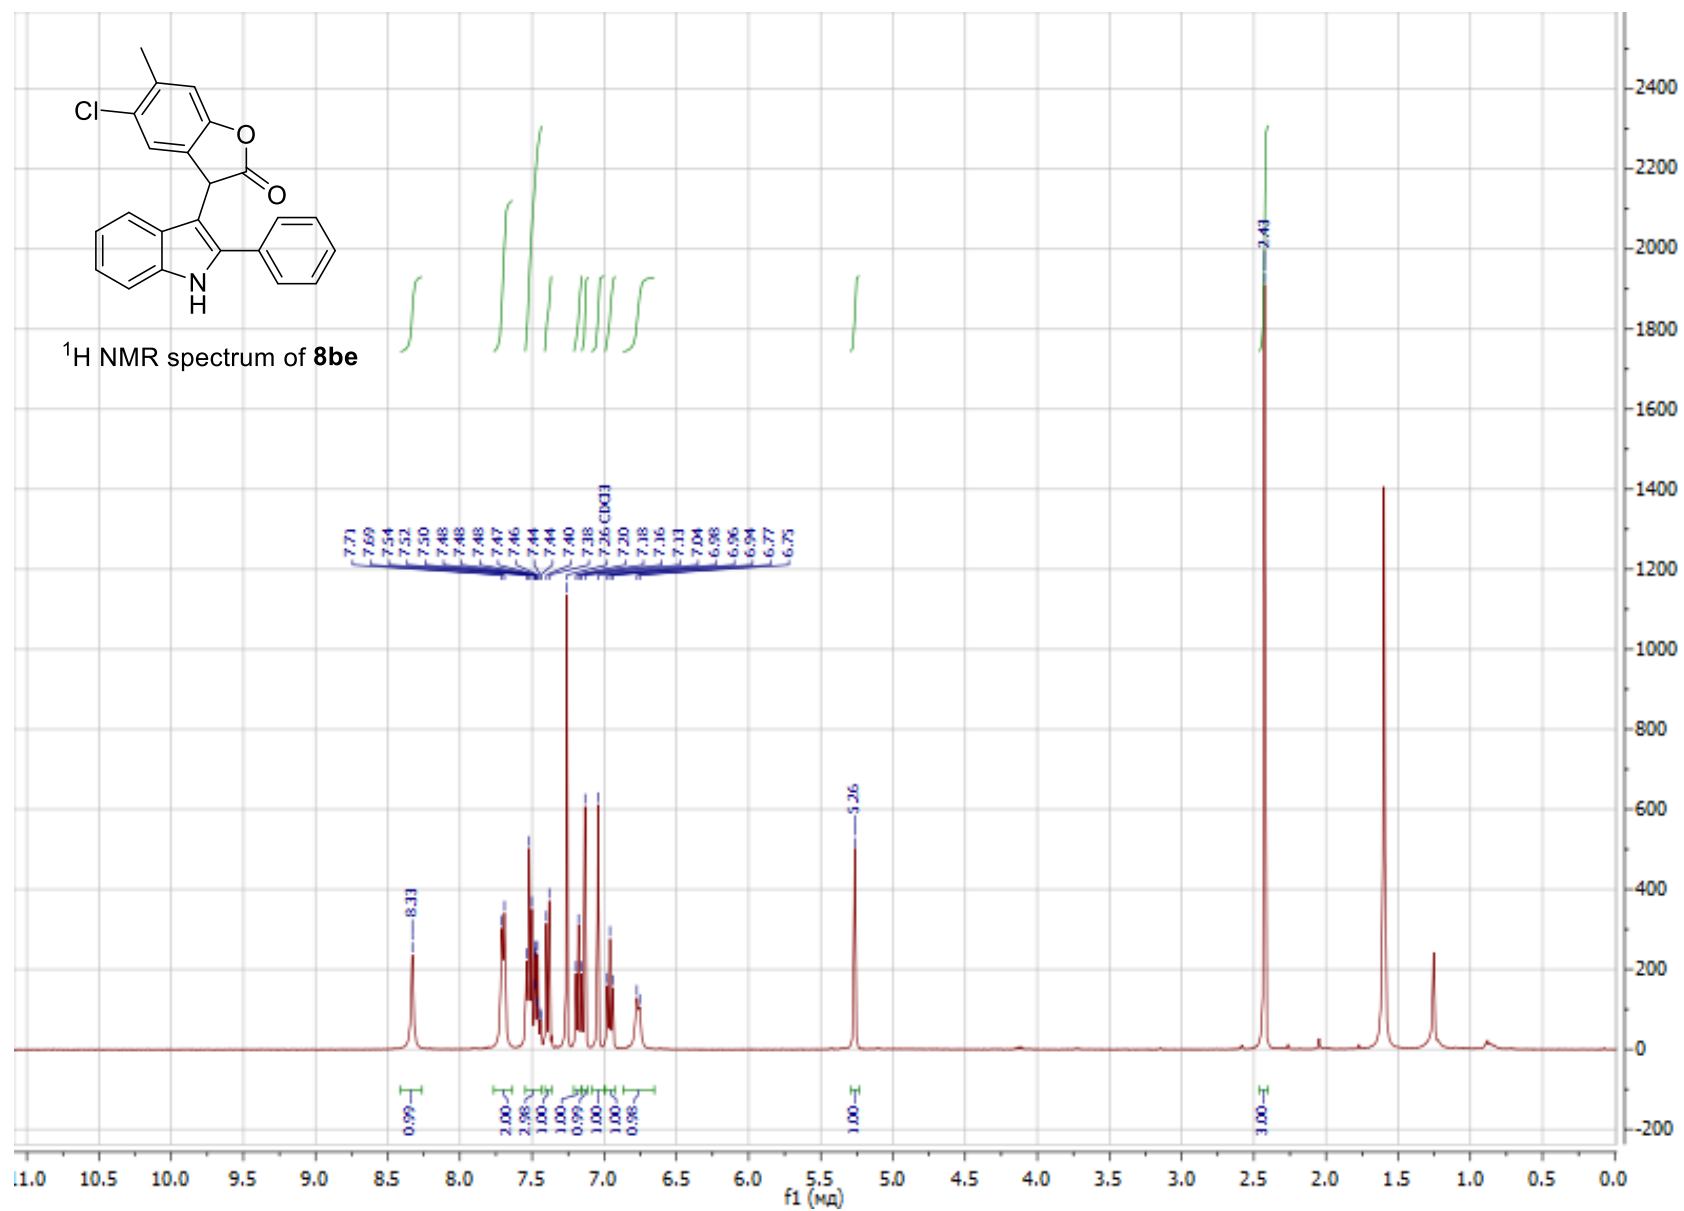

Figure S17. <sup>1</sup>H NMR spectrum of **8be**

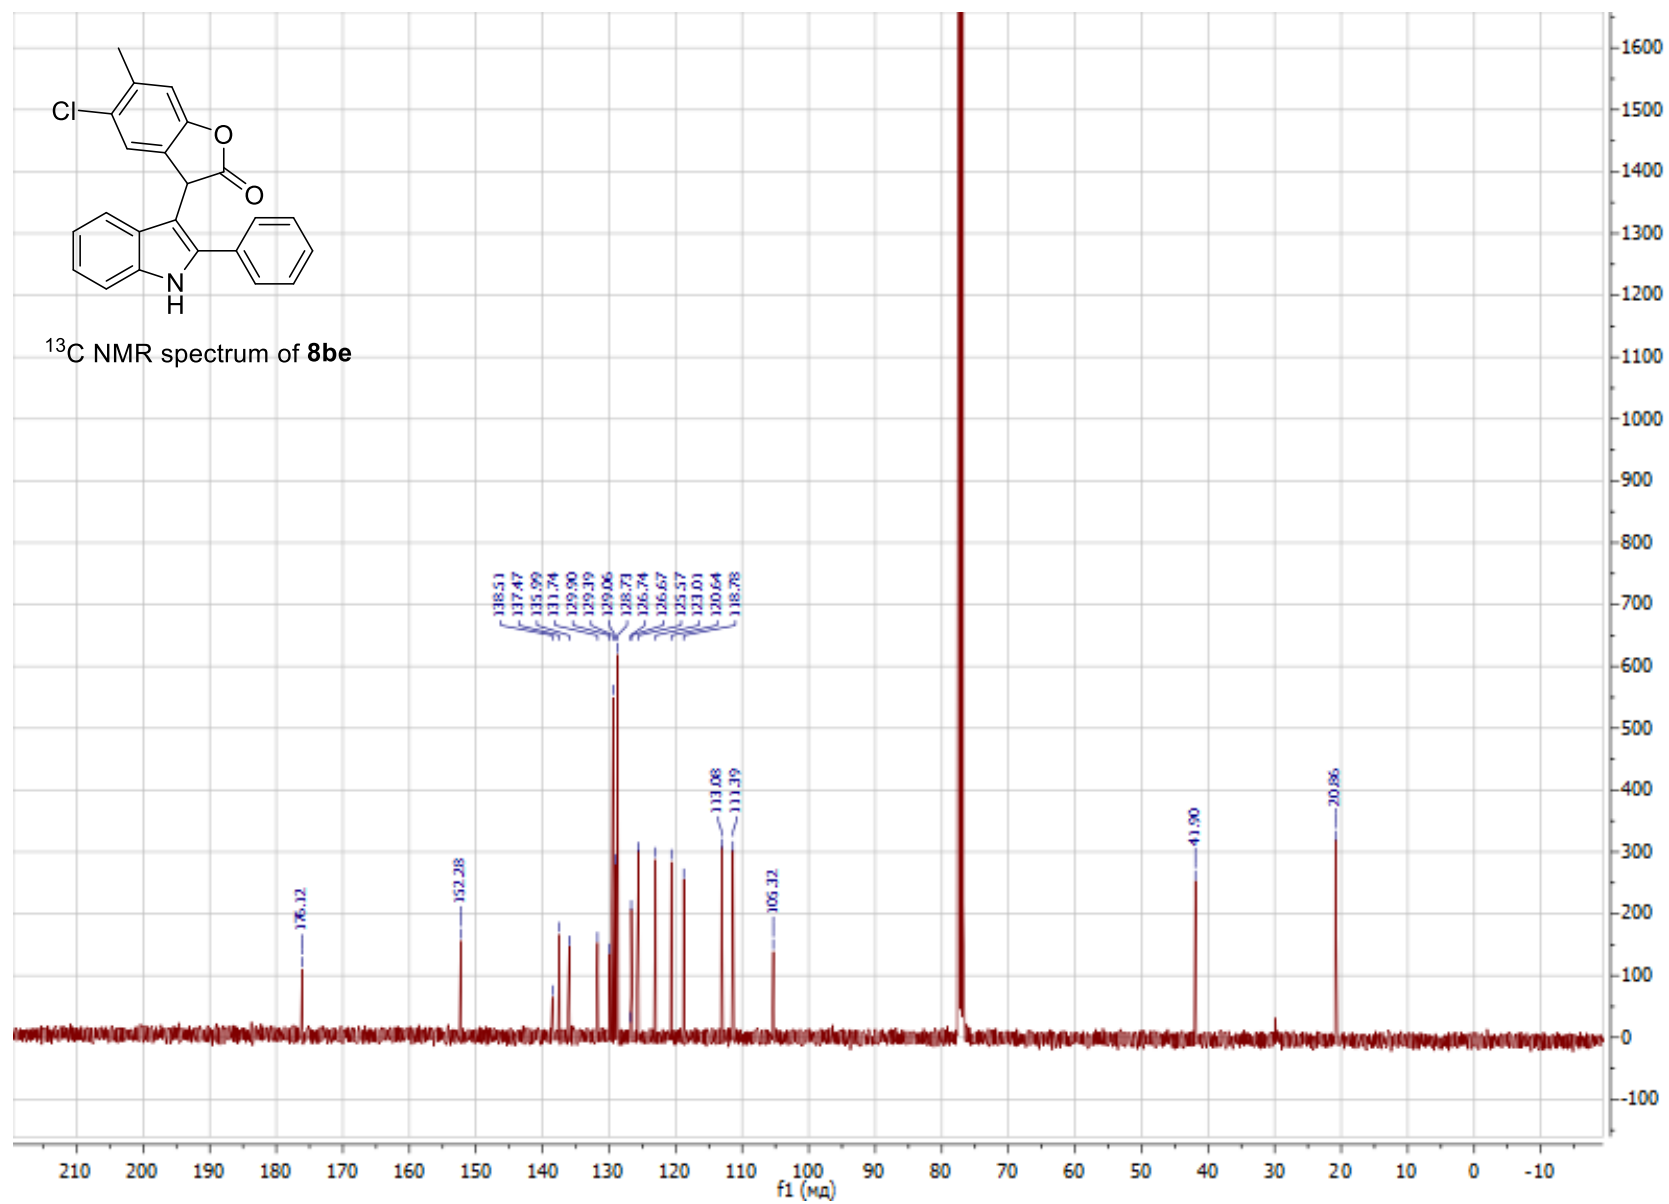

Figure S18.  $^{13}\text{C}$  NMR spectrum of **8be**

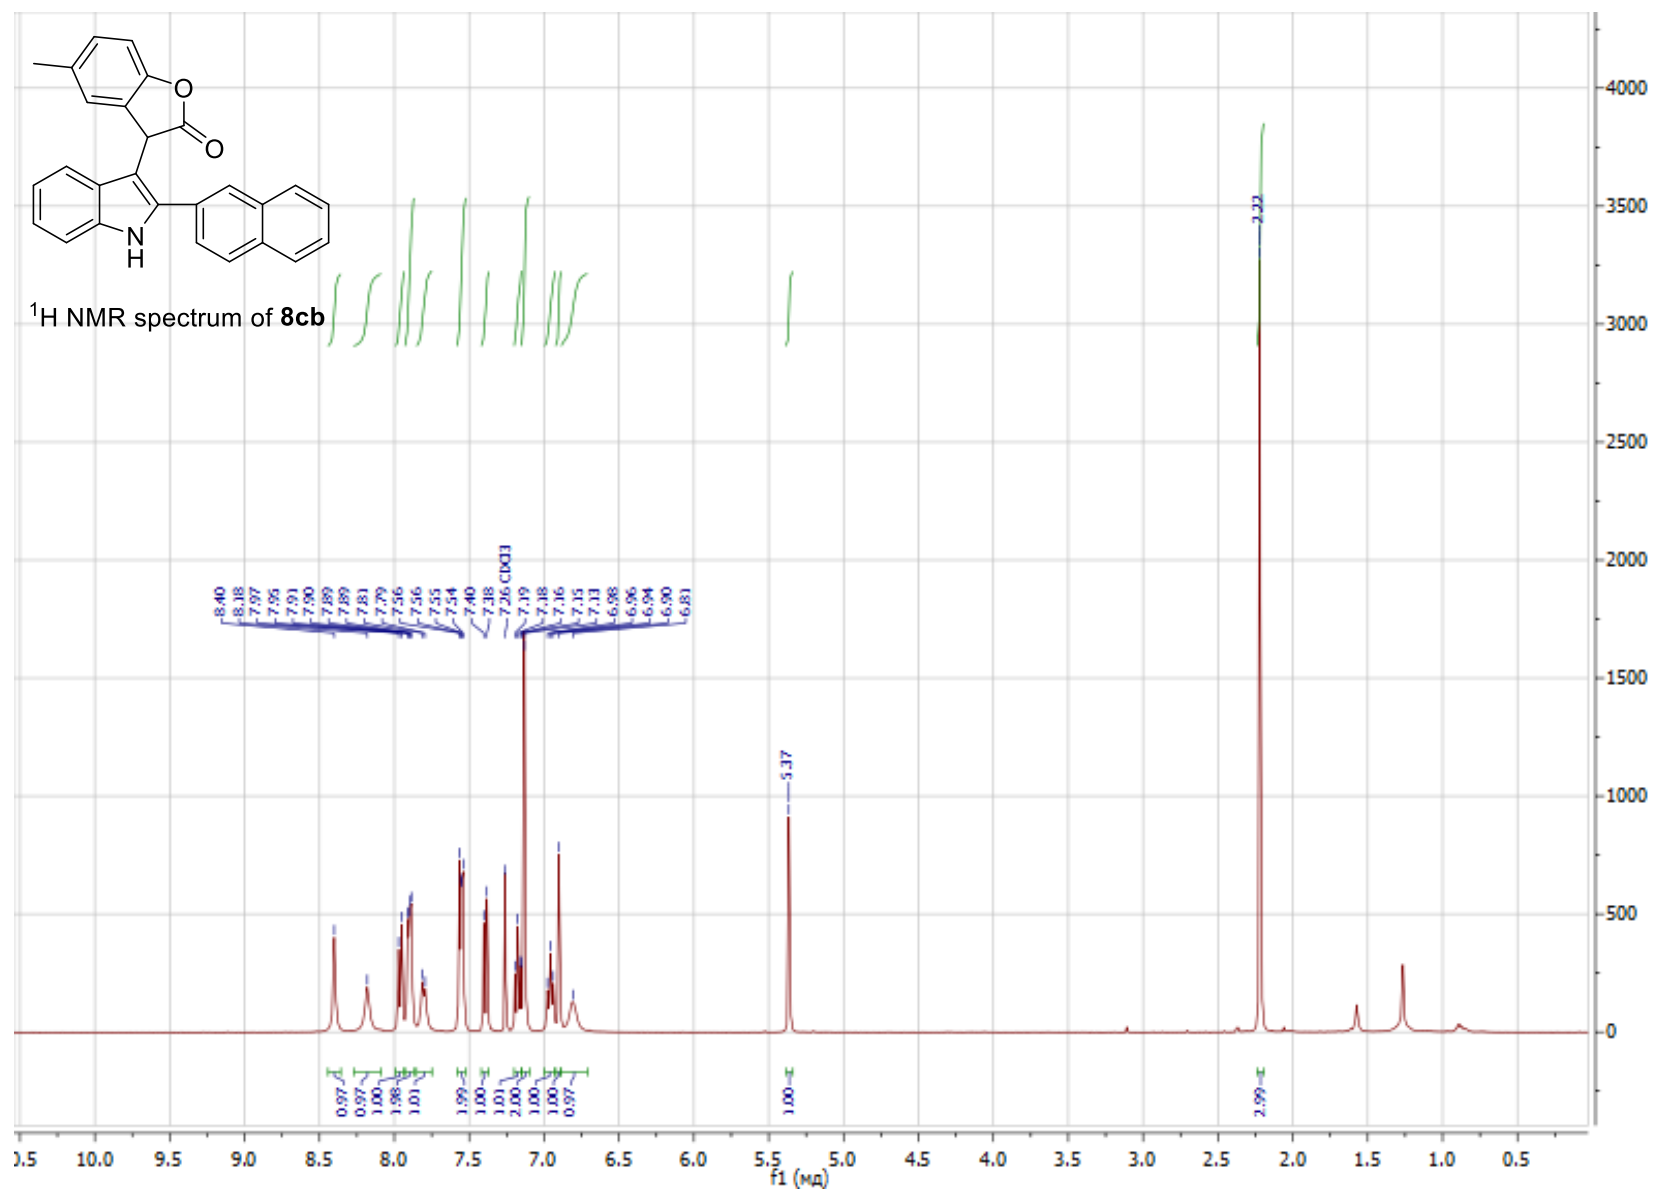

Figure S19. <sup>1</sup>H NMR spectrum of **8cb**

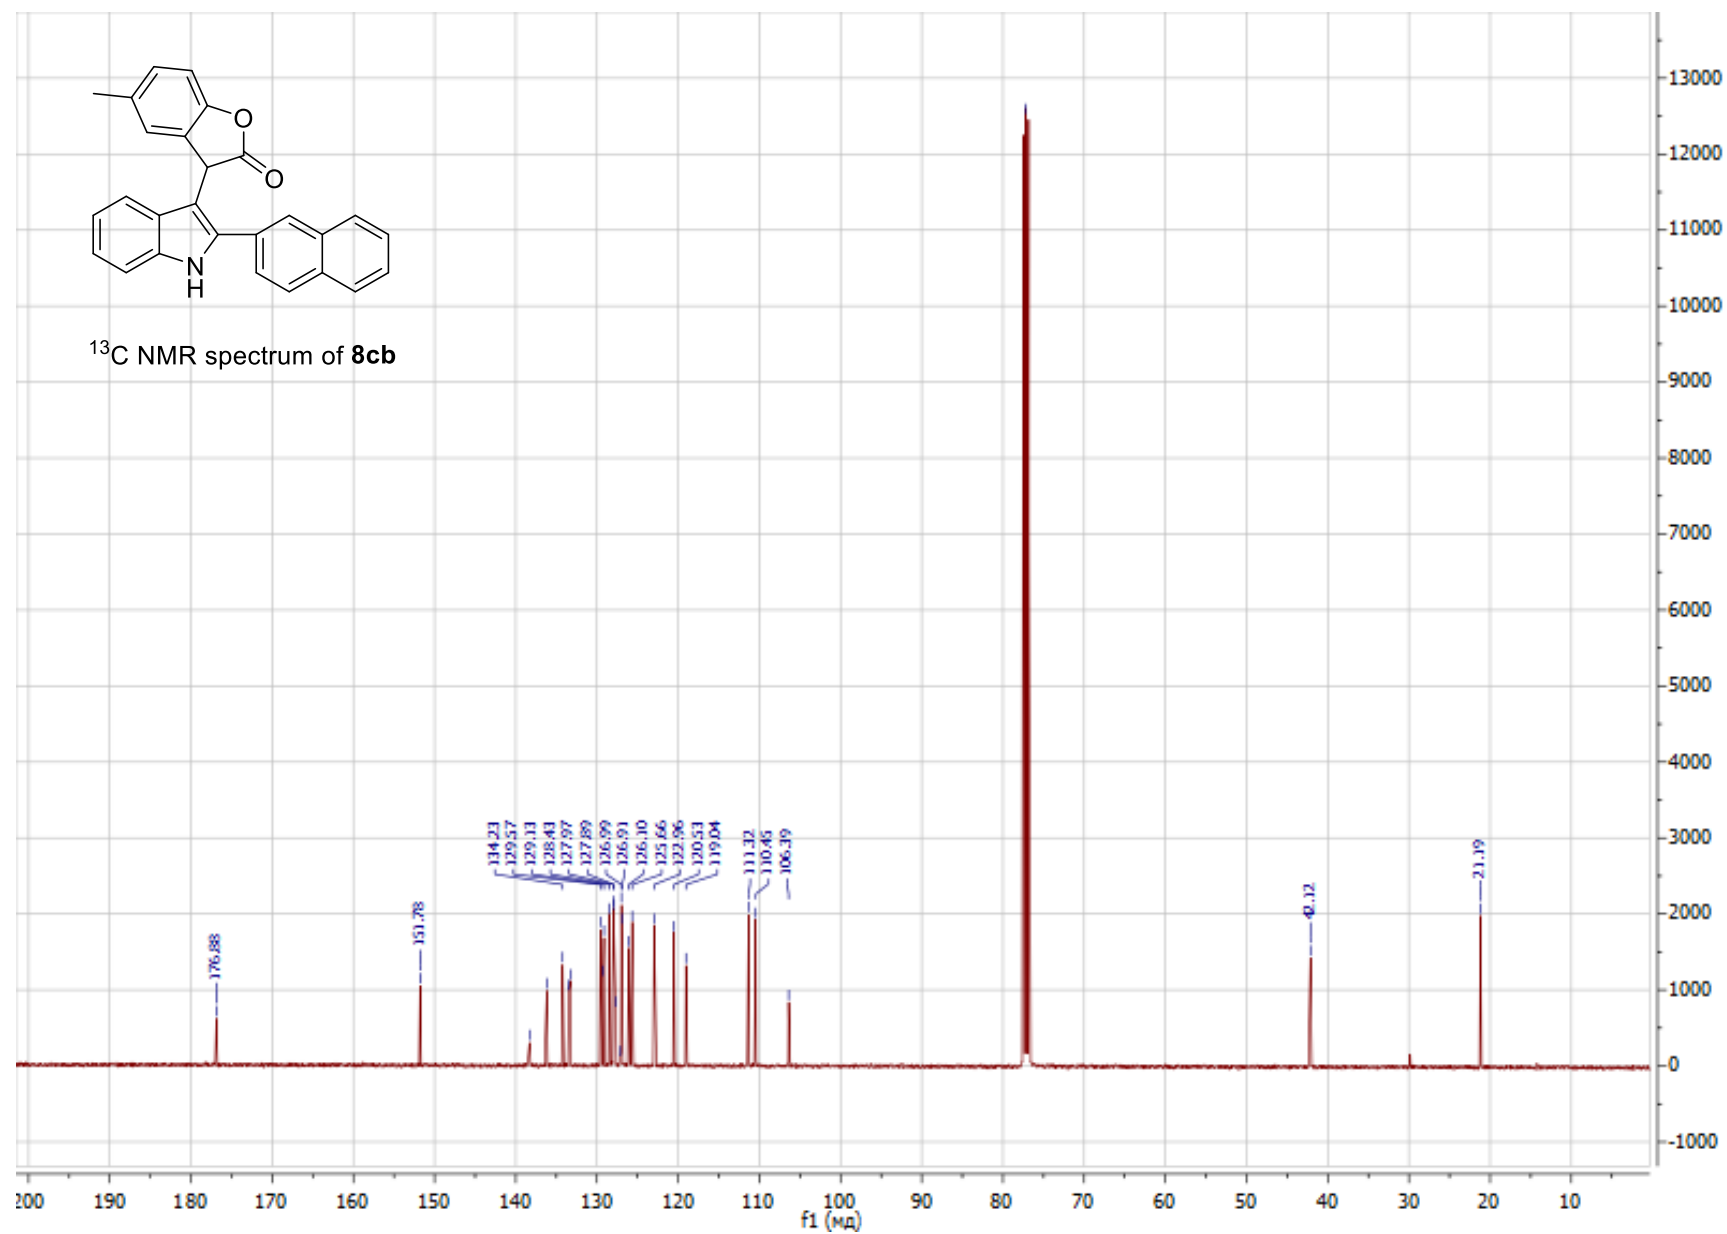

Figure S20.  $^{13}\text{C}$  NMR spectrum of **8cb**

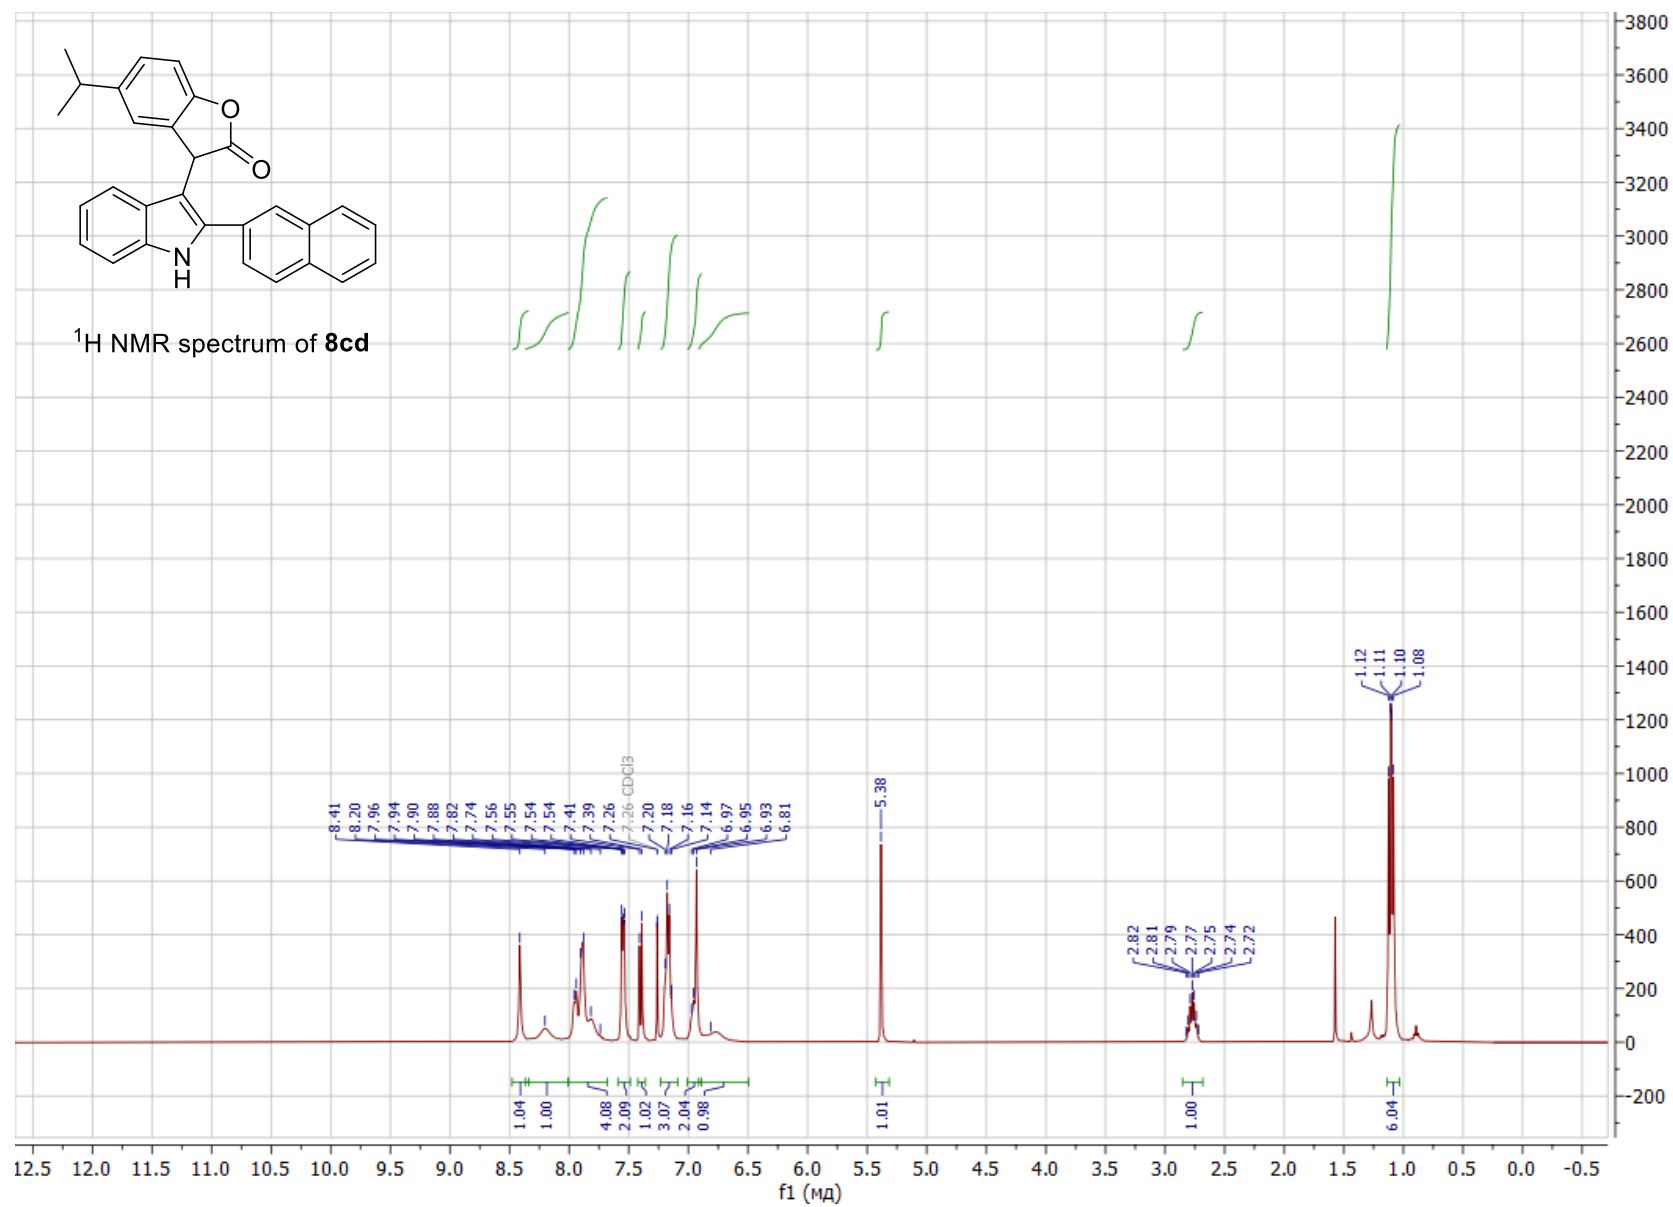

Figure S21.  $^1\text{H}$  NMR spectrum of **8cd**

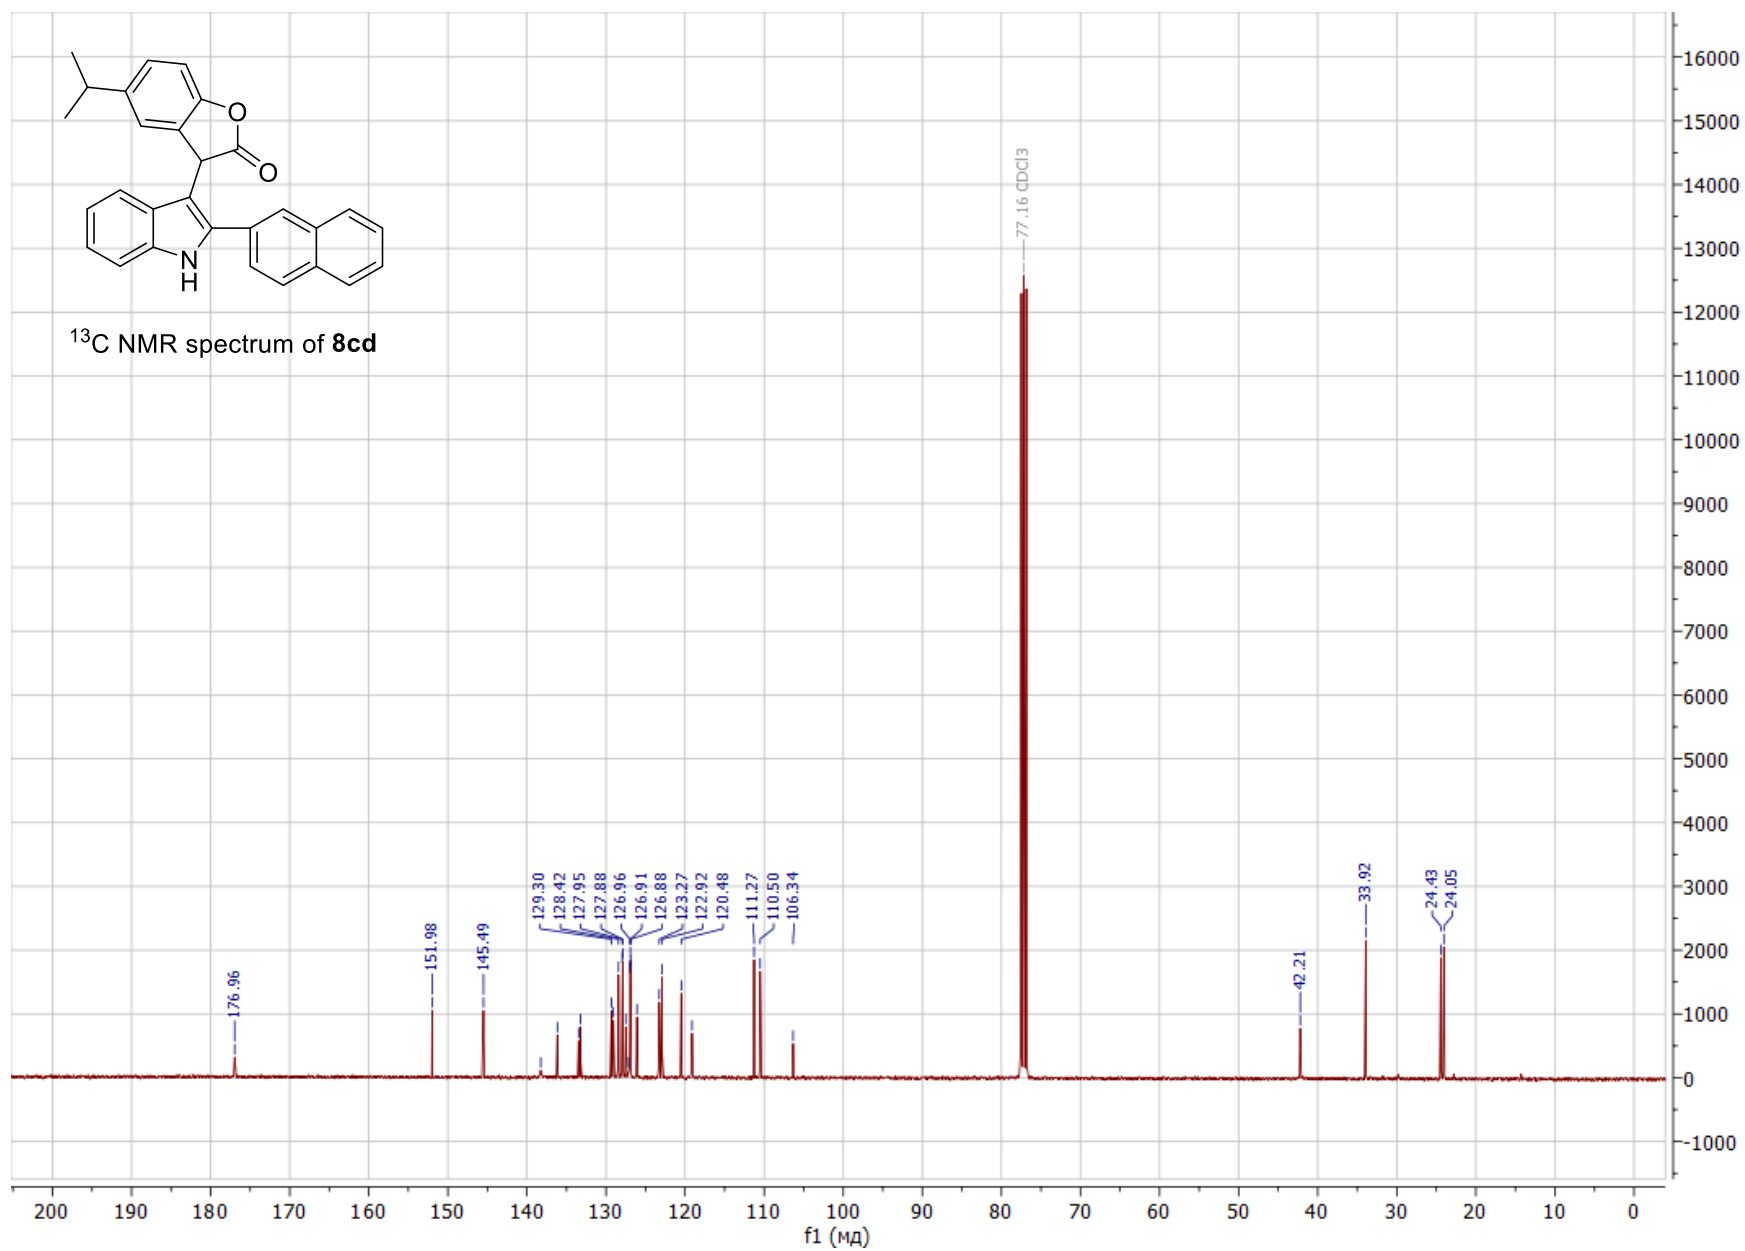

Figure S22.  $^{13}\text{C}$  NMR spectrum of **8cd**

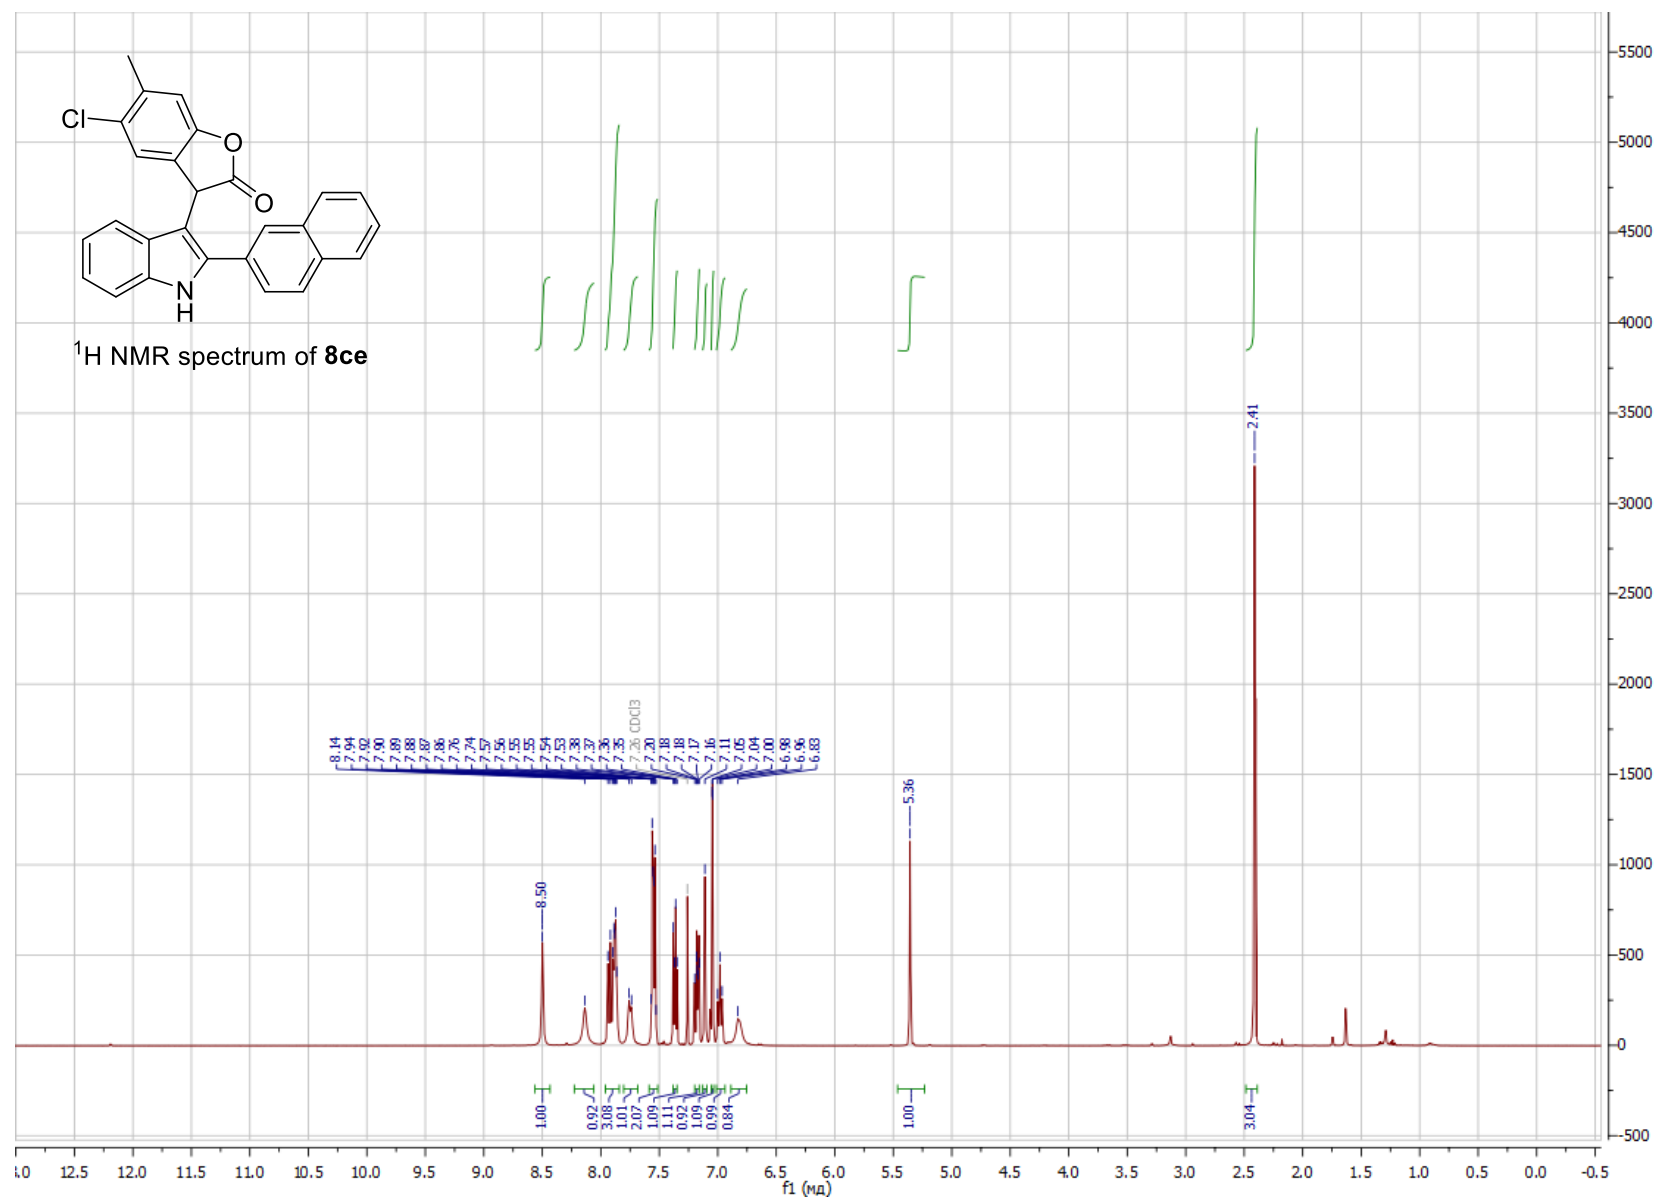



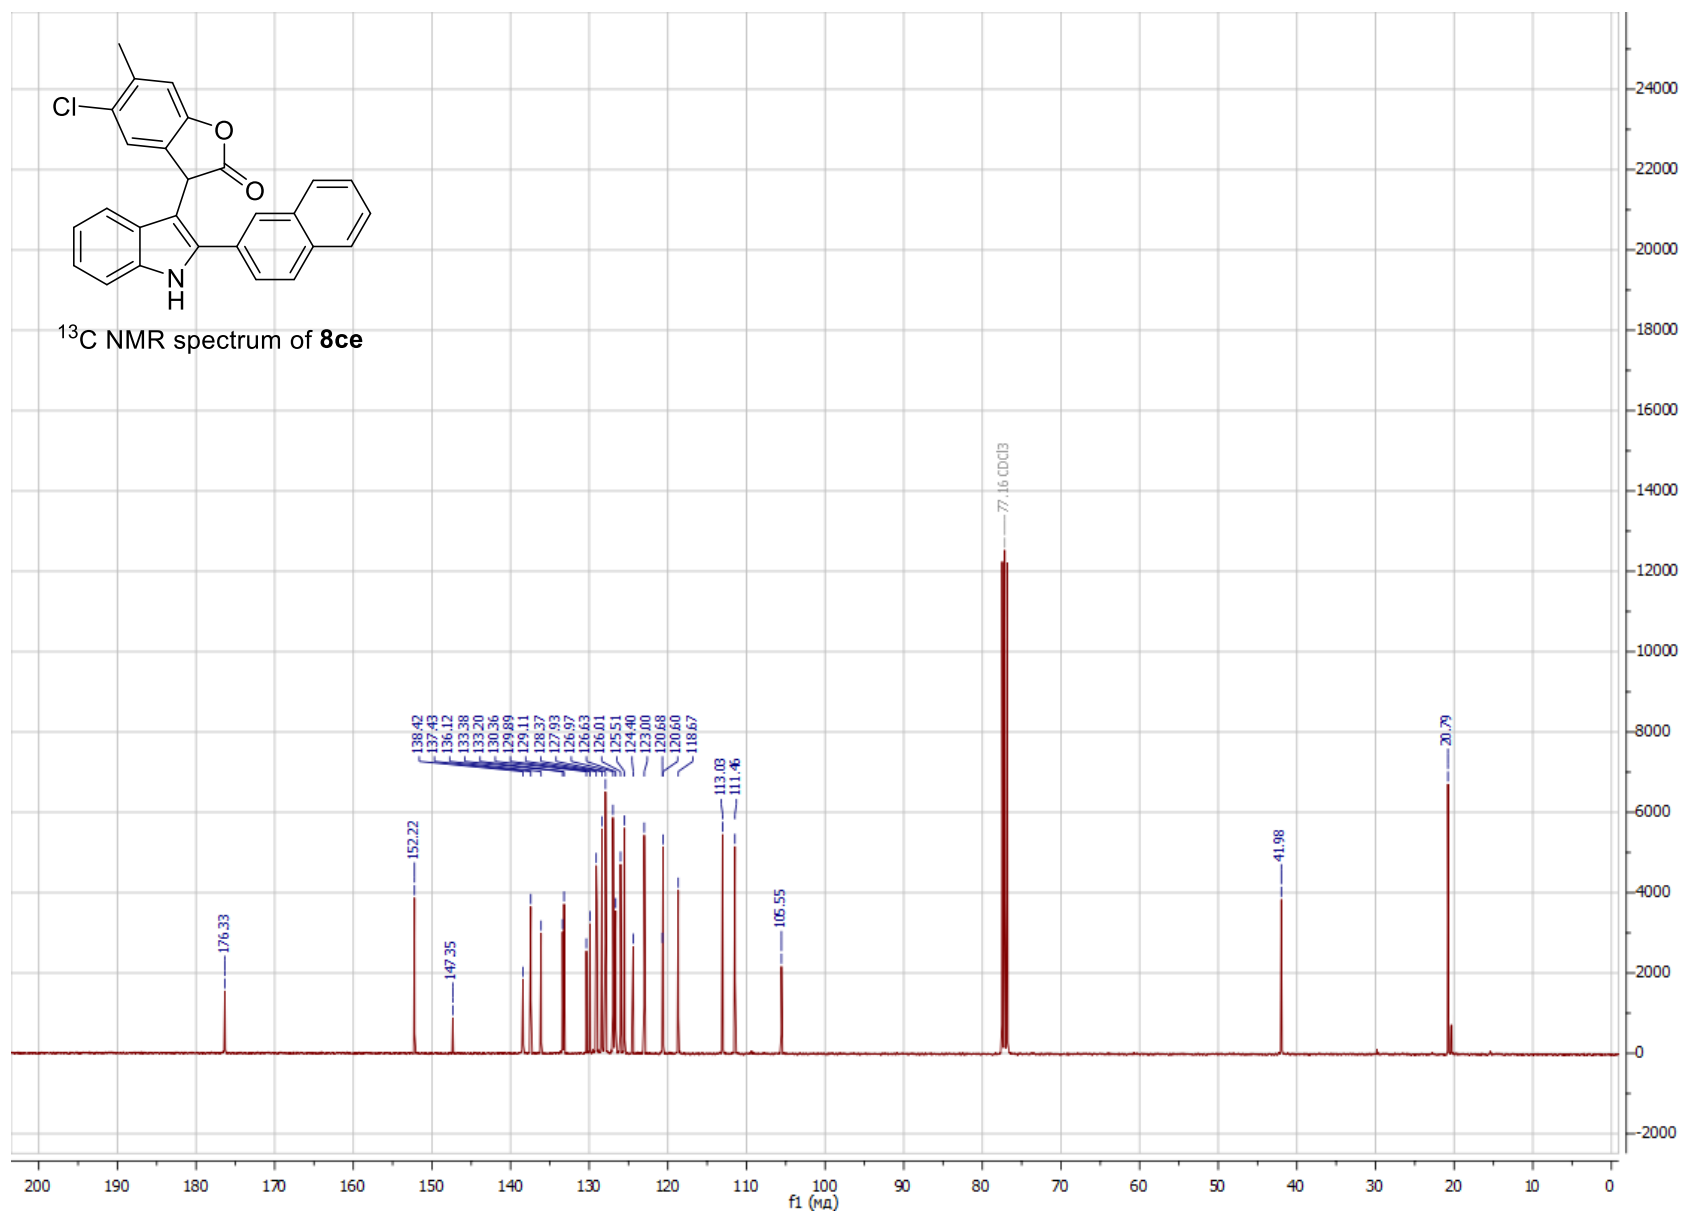

Figure S24.  $^{13}\text{C}$  NMR spectrum of **8ce**

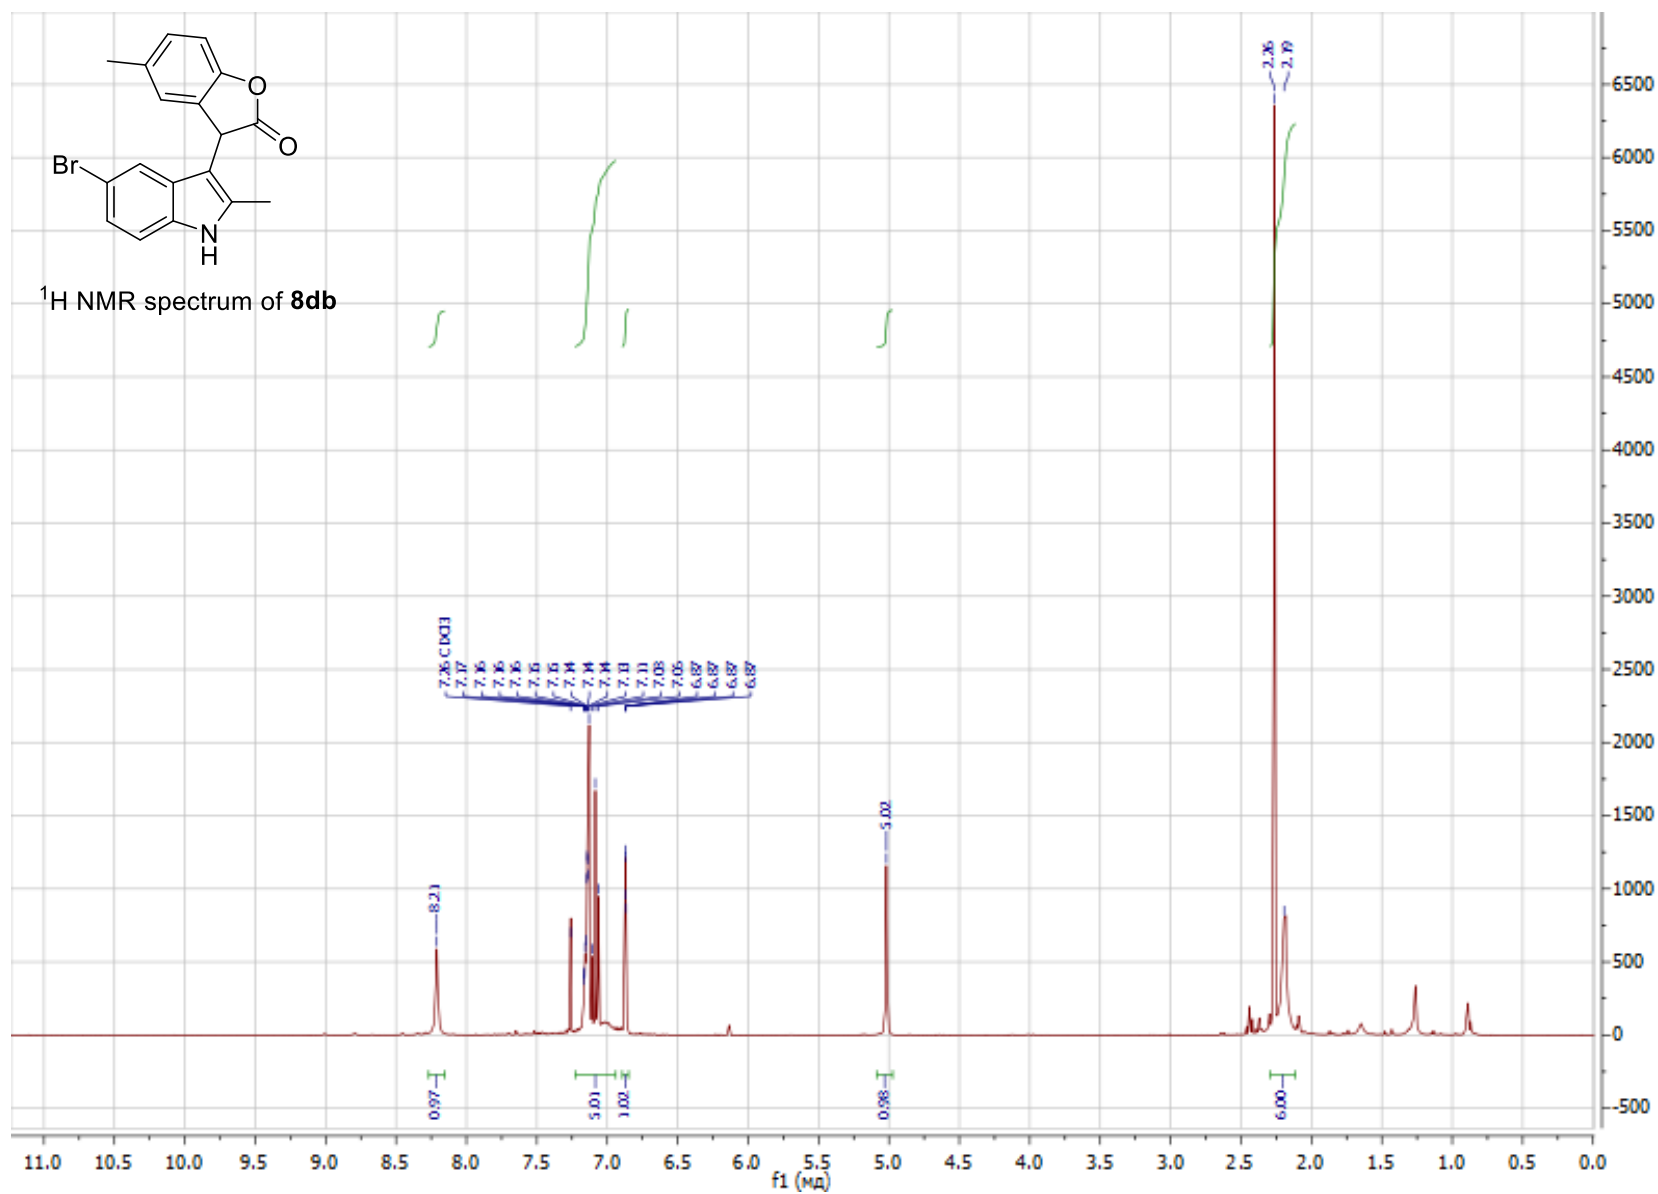

Figure S25. <sup>1</sup>H NMR spectrum of **8db**

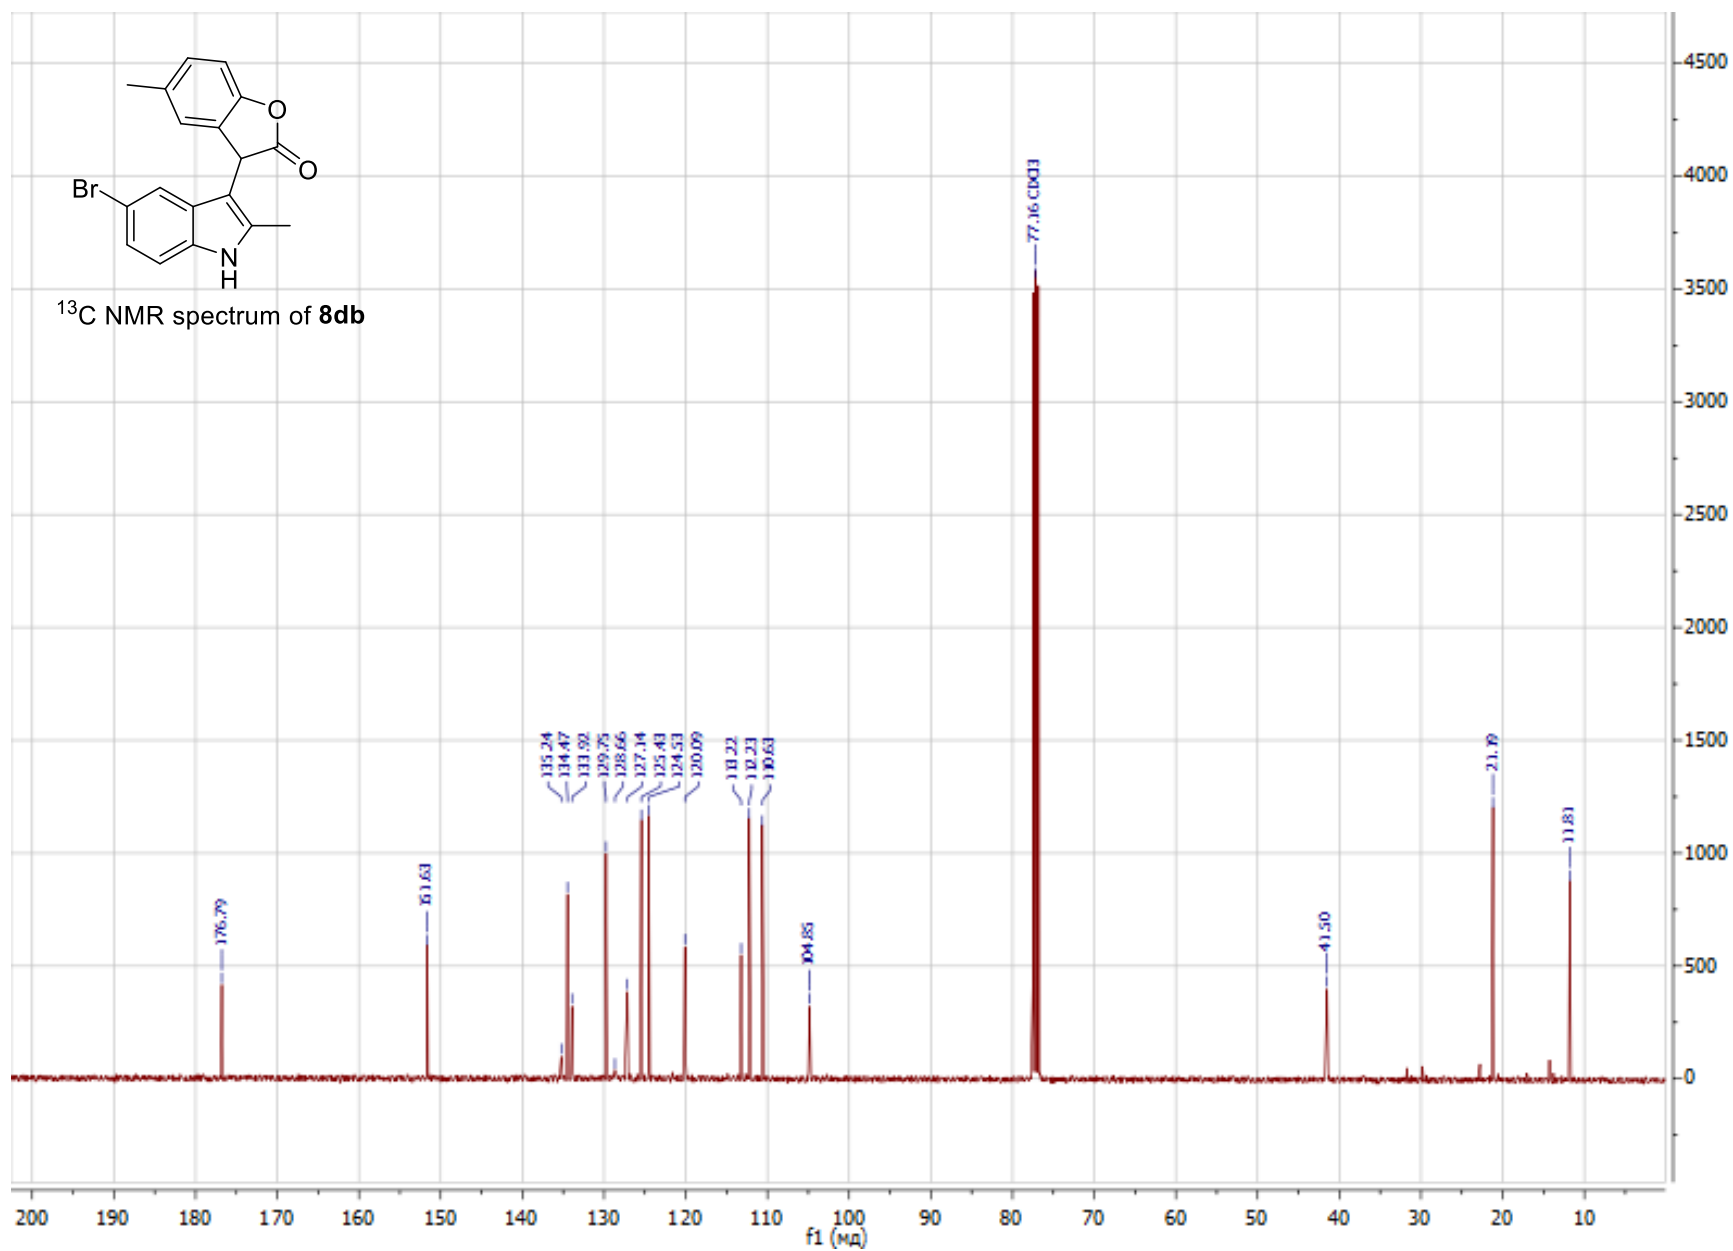

Figure S26. <sup>13</sup>C NMR spectrum of **8db**

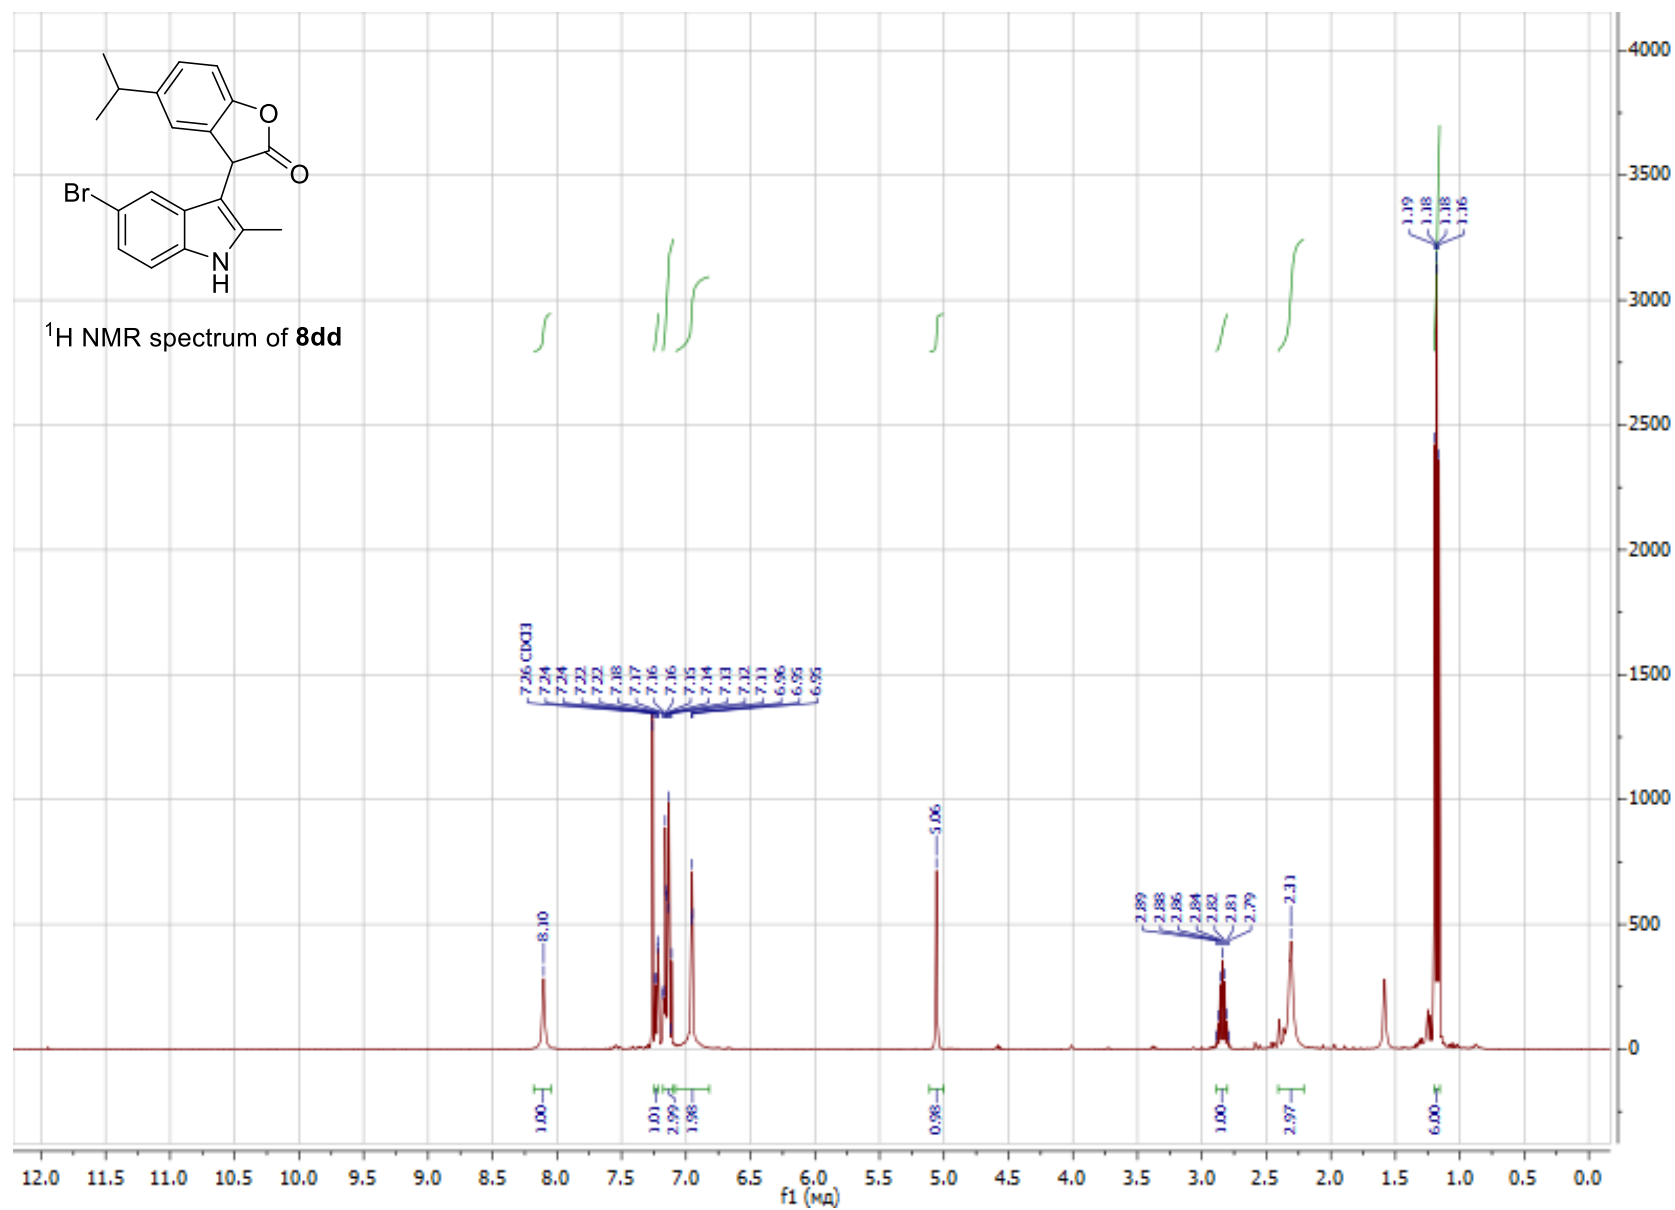

Figure S27. <sup>1</sup>H NMR spectrum of **8dd**

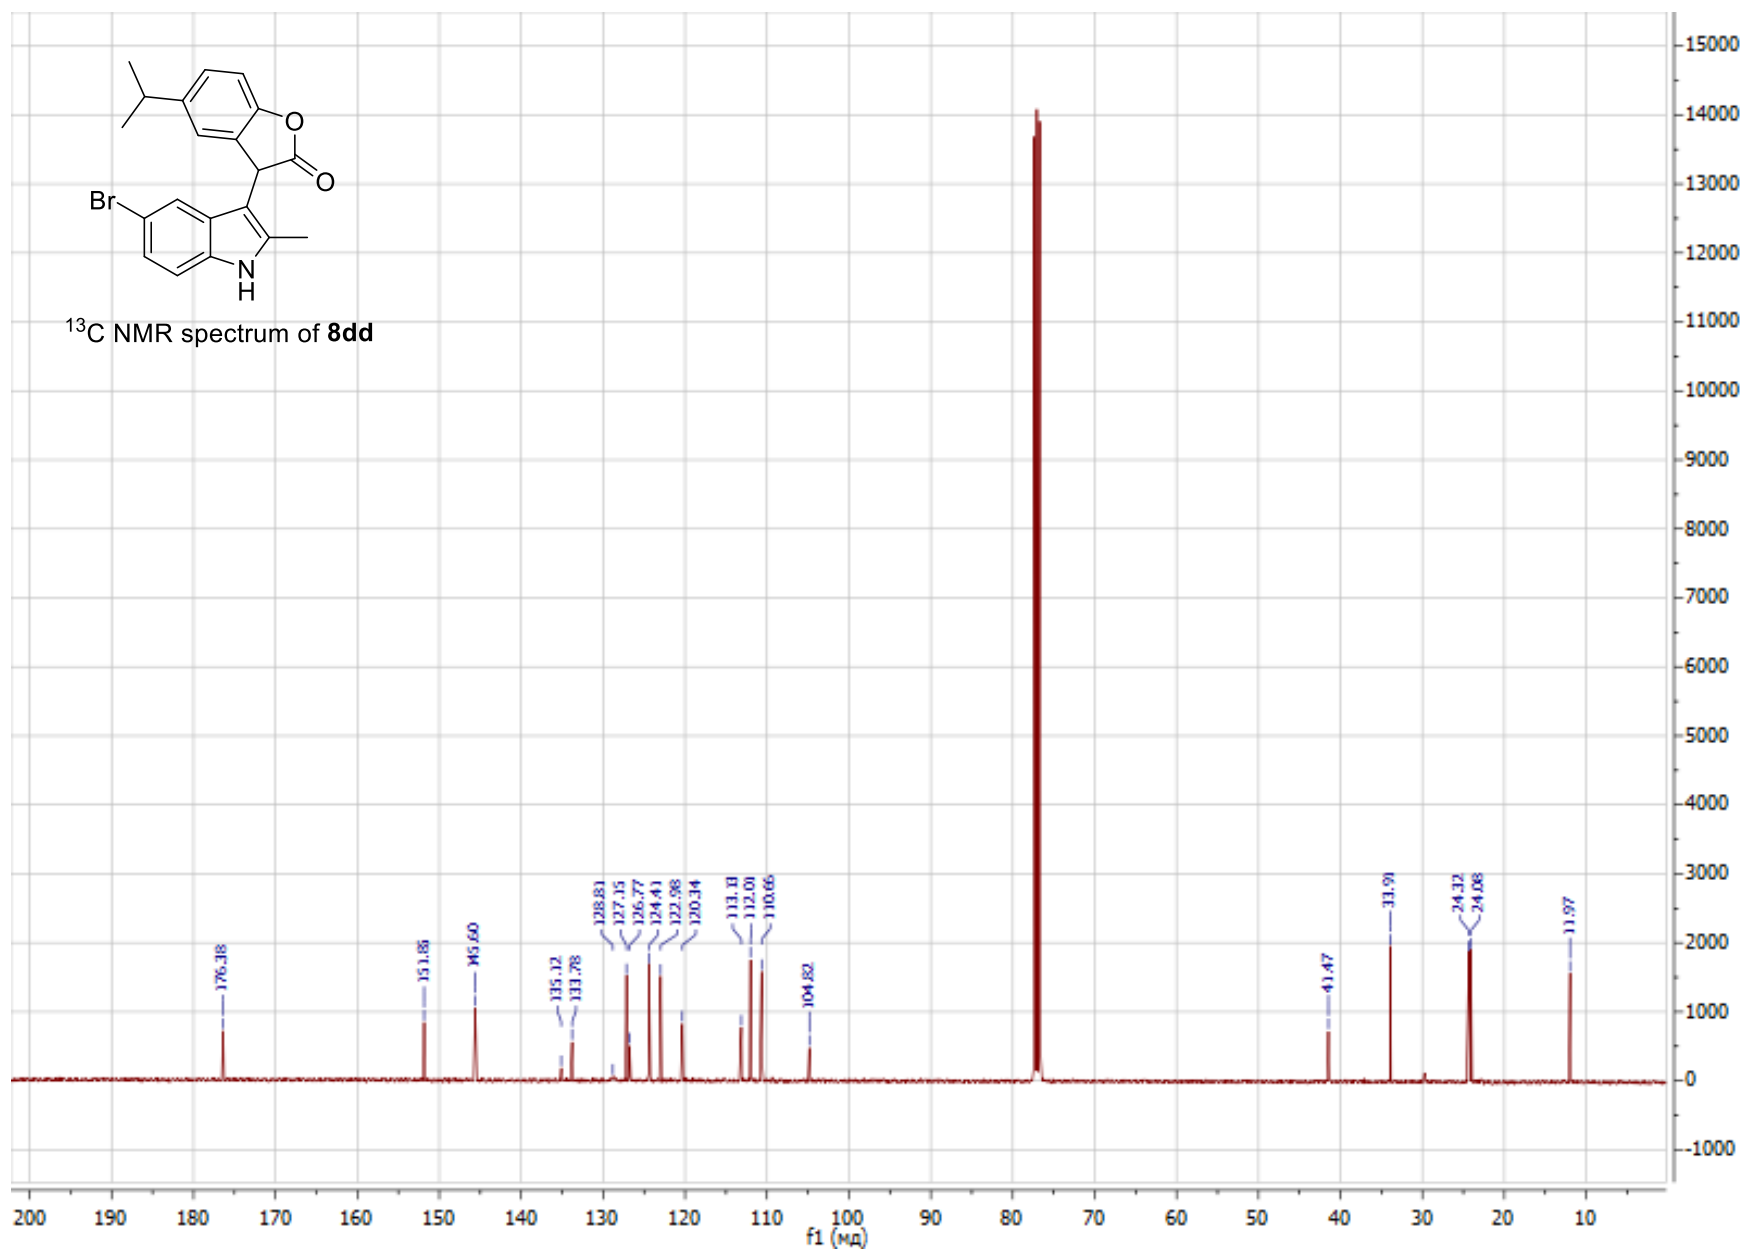

Figure S28. <sup>13</sup>C NMR spectrum of **8dd**

**$^1\text{H}$  and  $^{13}\text{C}$  NMR spectral charts for 4,5-Dimethyl-2-(1-(2-methyl-1*H*-indol-3-yl)-2-nitroethyl)phenol (**9aa**):**

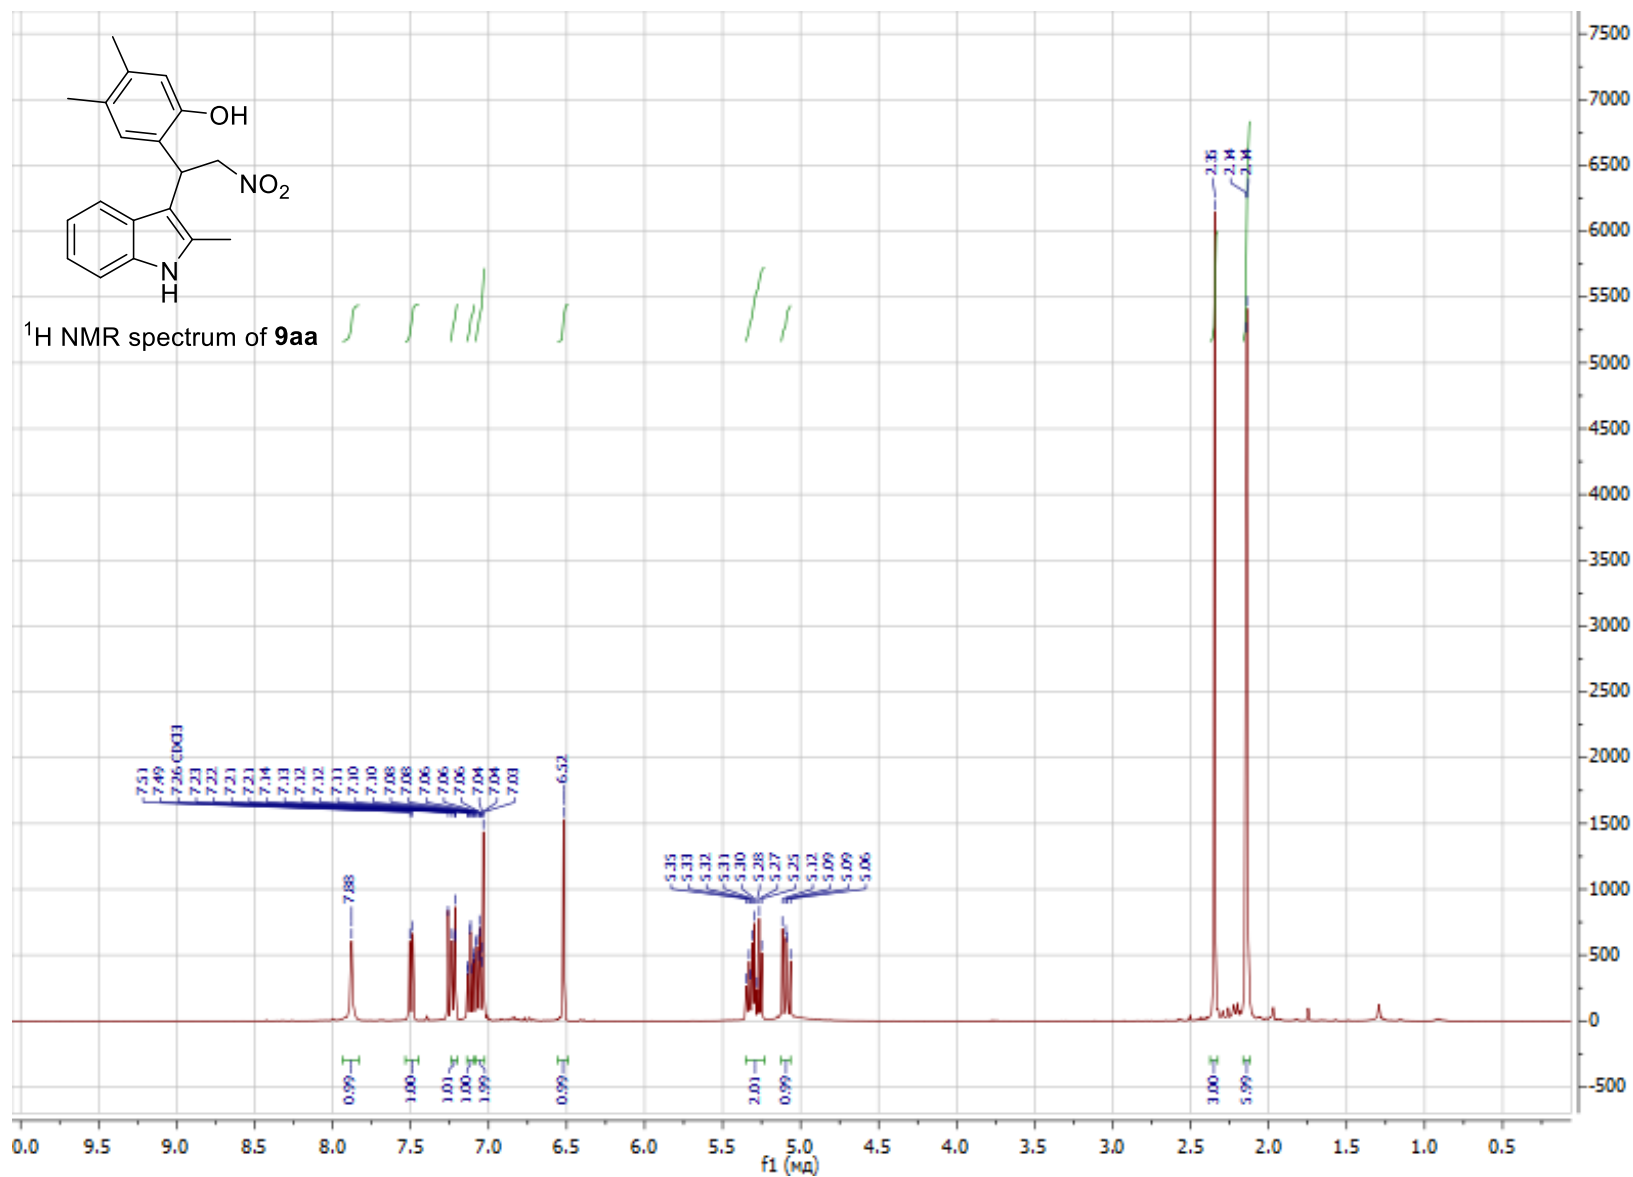

Figure S29.  $^1\text{H}$  NMR spectrum of **9aa**

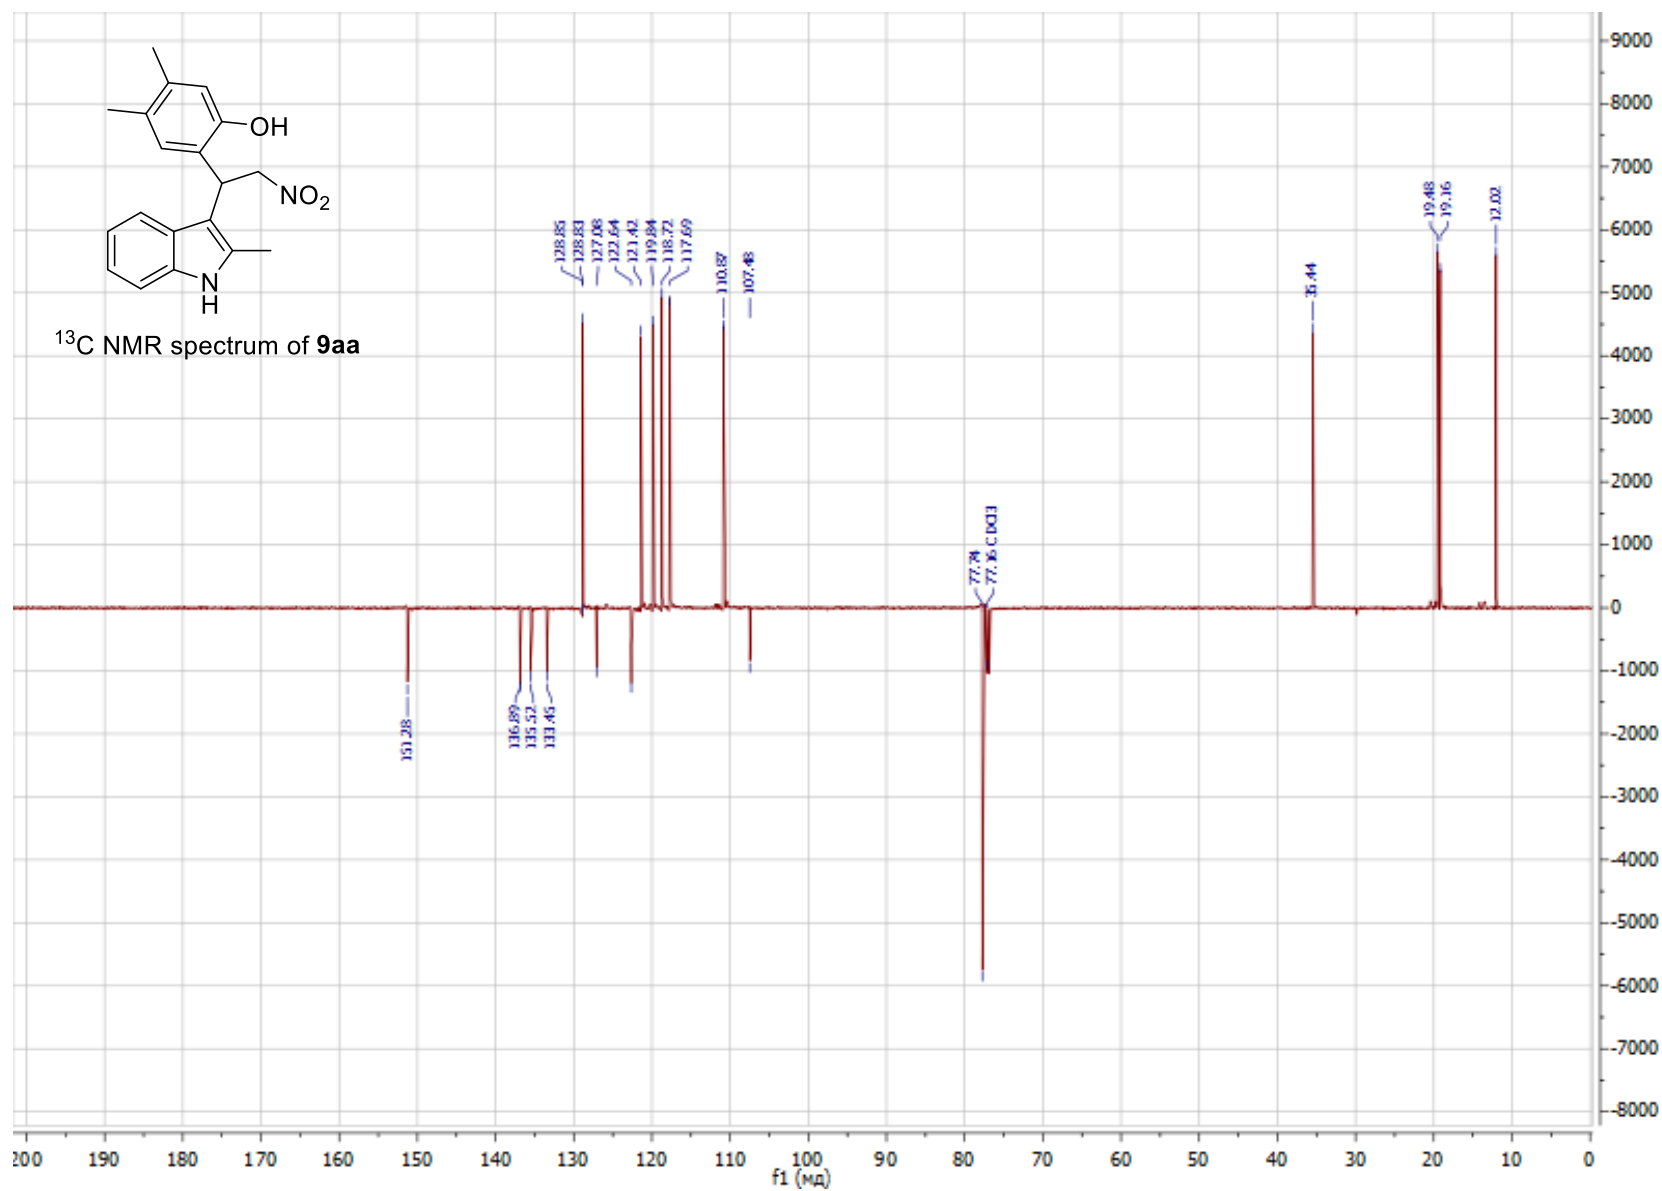

Figure S30. <sup>13</sup>C NMR spectrum of **9aa**

## HRMS spectral charts

### HRMS spectral chart for starting (E)-5-bromo-2-methyl-3-(2-nitrovinyl)-1H-indole (3d)

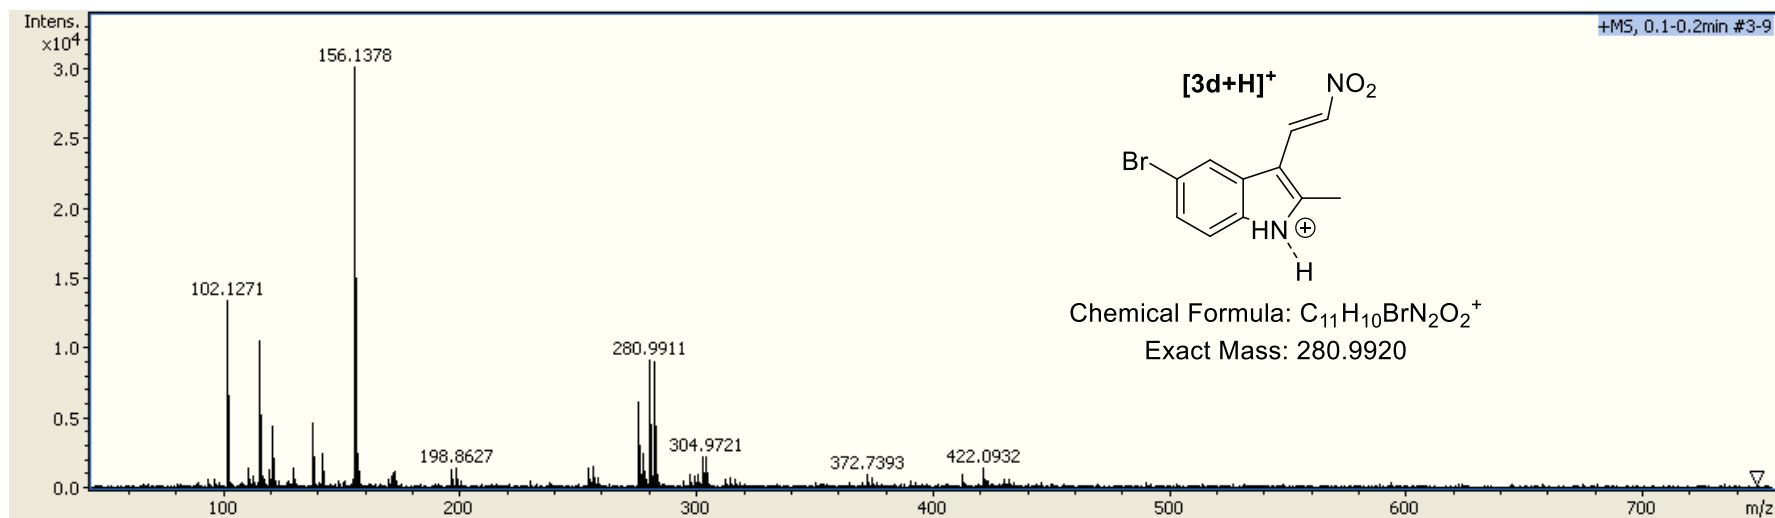

Figure S31. HRMS spectral chart for **3d**



# HRMS spectral charts for 3-(1*H*-indol-3-yl)benzofuran-2(3*H*)-ones (8aa-8dd)

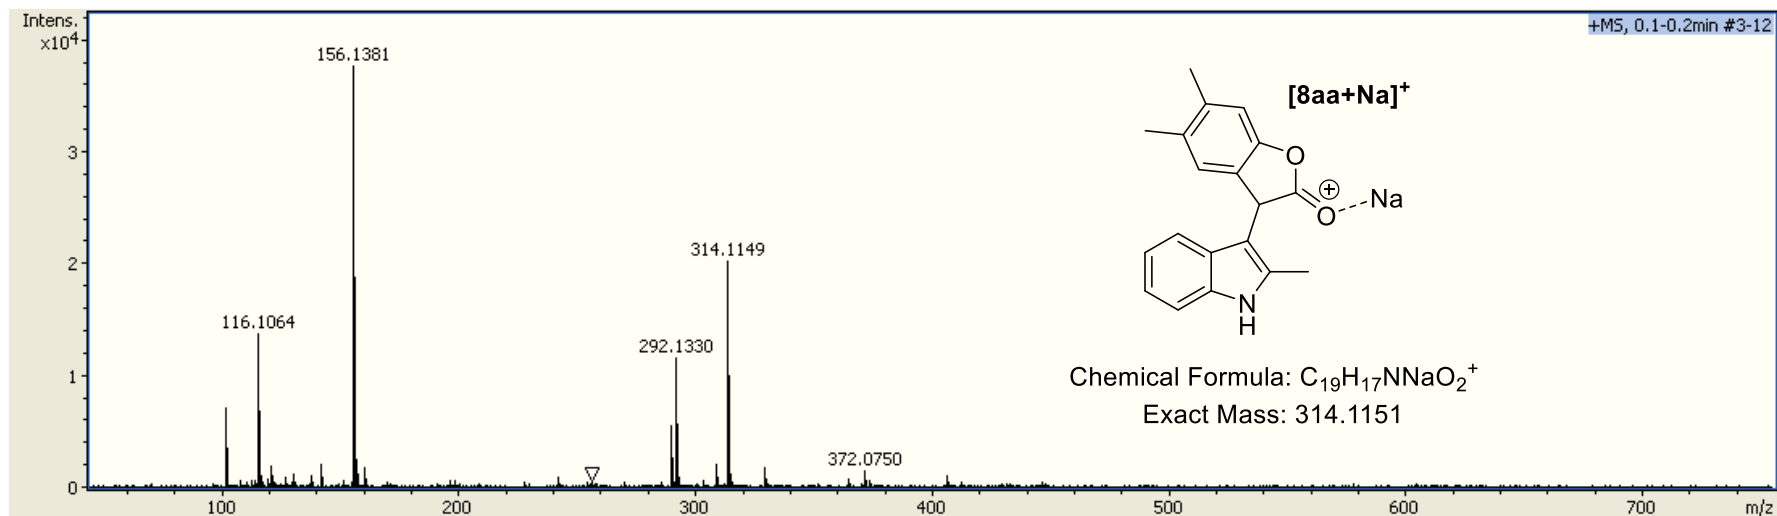

Figure S32. HRMS spectral chart for **8aa**

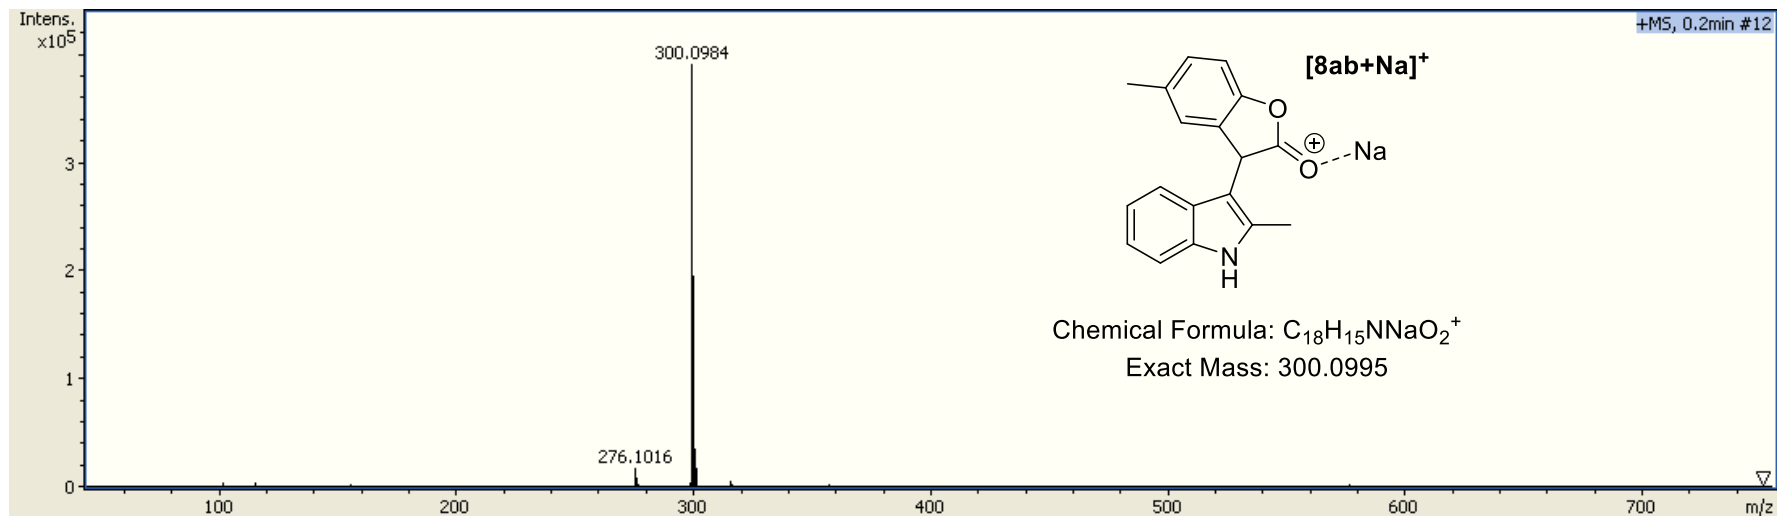

Figure S33. HRMS spectral chart for **8ab**

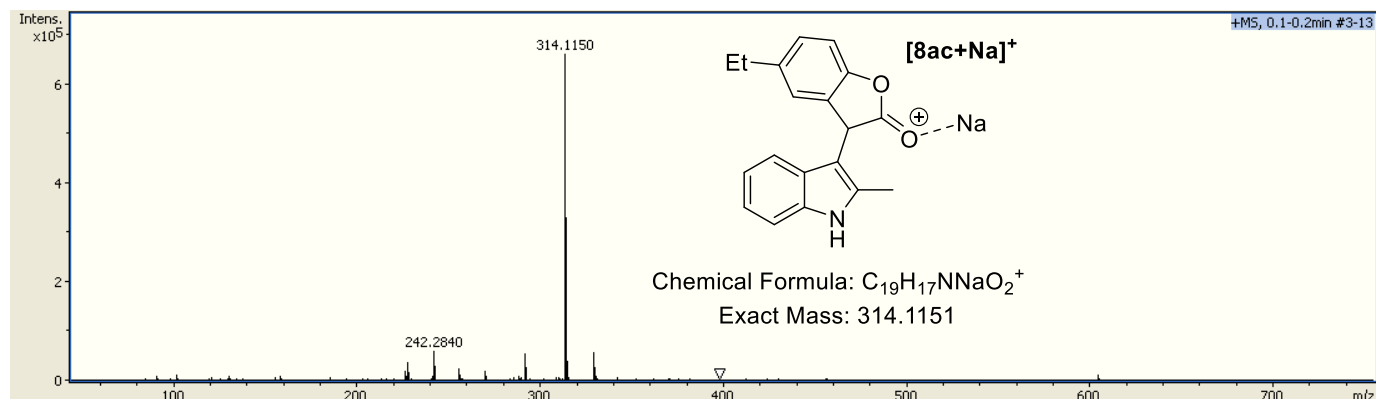

Figure S34. HRMS spectral chart for **8ac**

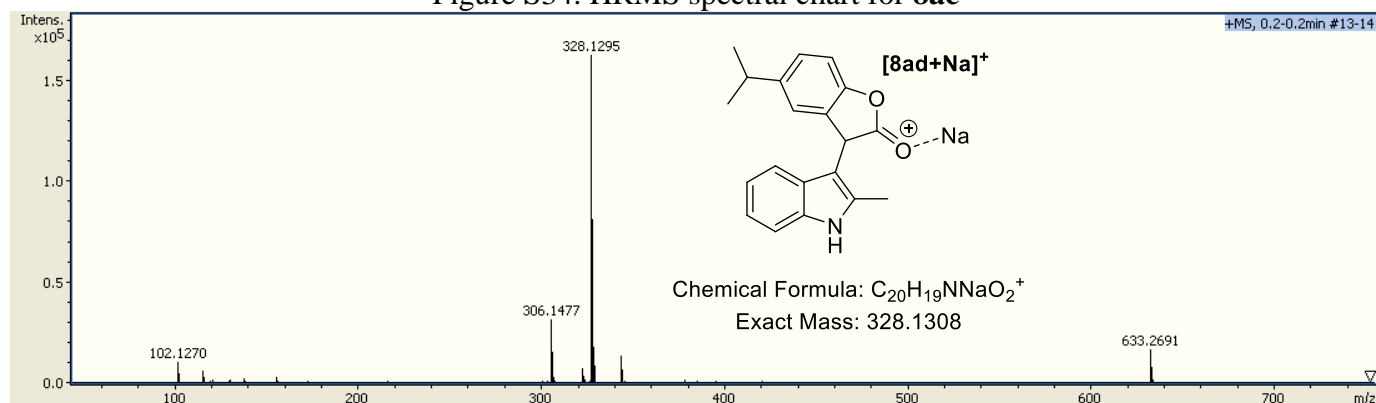

Figure S35. HRMS spectral chart for **8ad**

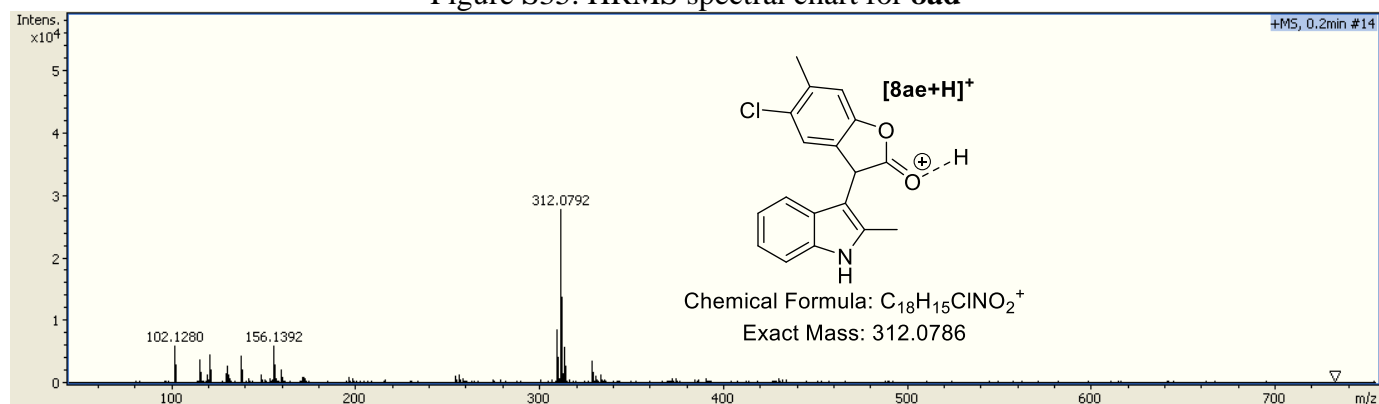

Figure S36. HRMS spectral chart for **8ae**

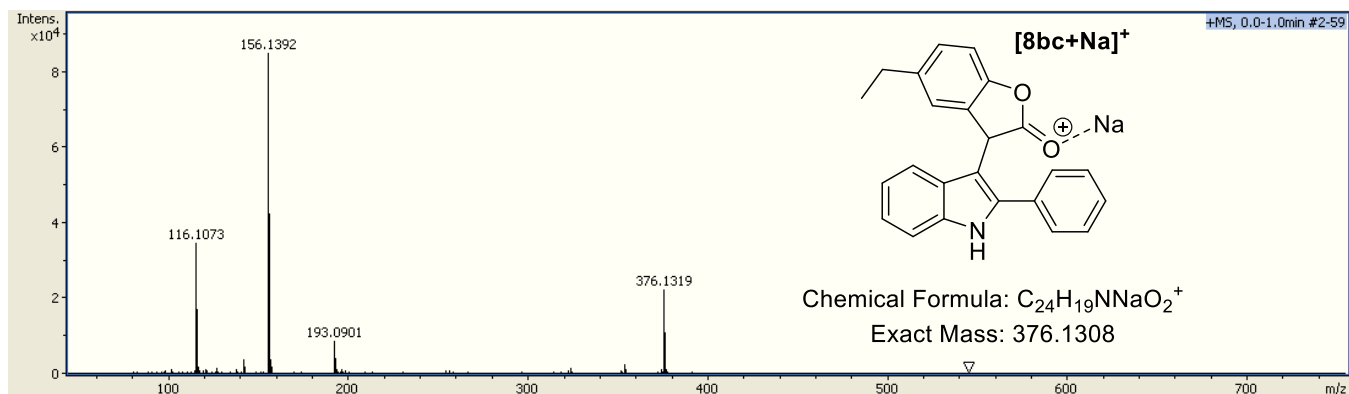

Figure S37. HRMS spectral chart for **8bc**

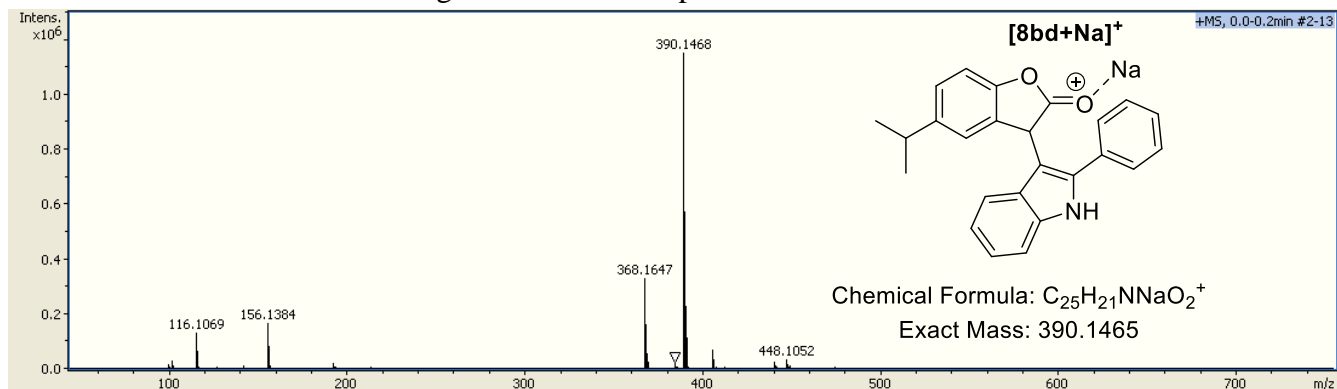

Figure S38. HRMS spectral chart for **8bd**

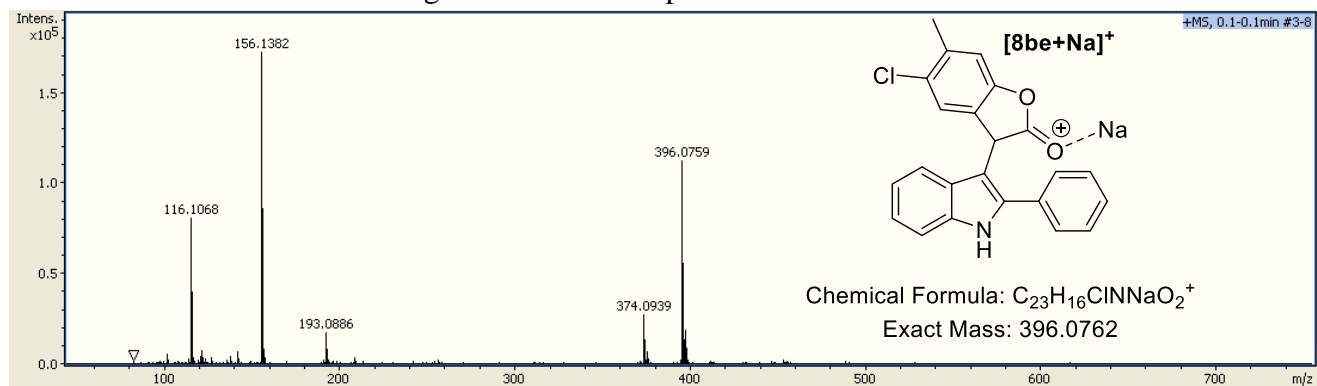

Figure S39. HRMS spectral chart for **8be**

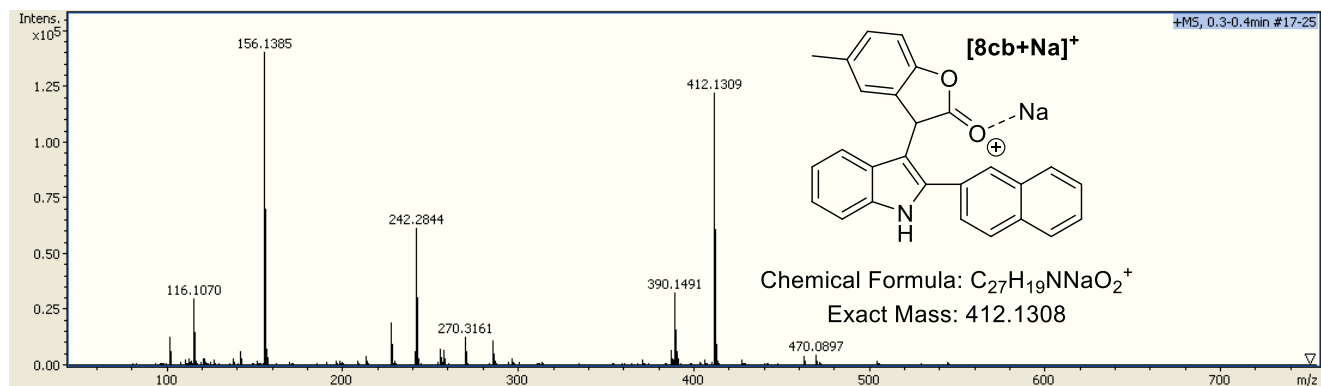

Figure S40. HRMS spectral chart for **8cb**

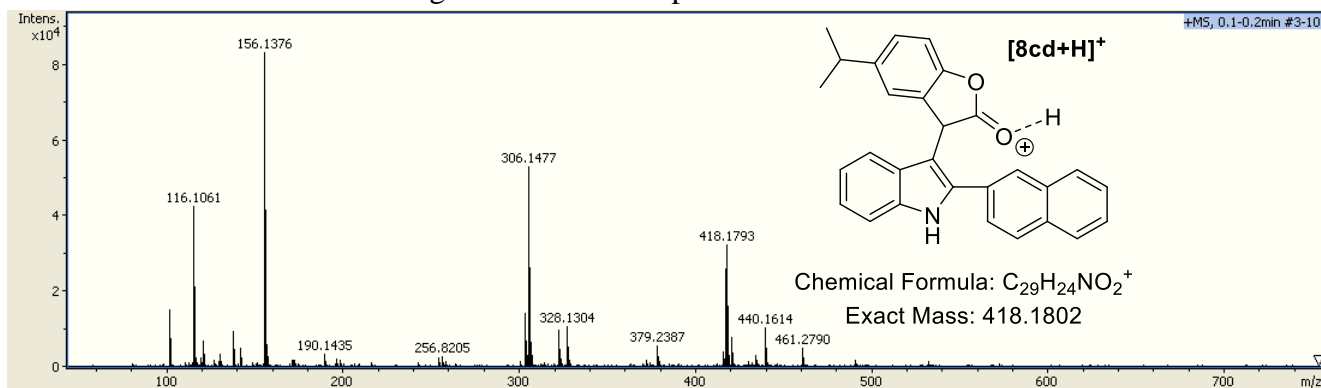

Figure S41. HRMS spectral chart for **8cd**

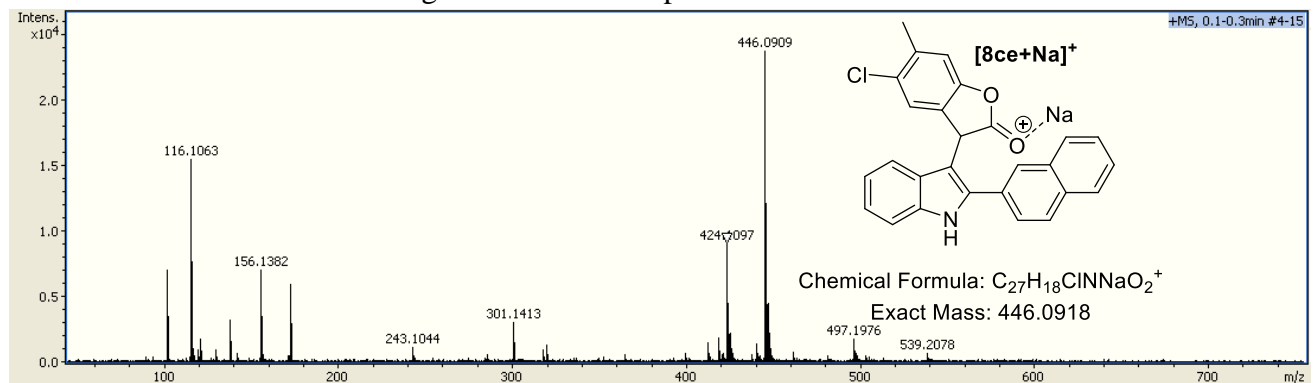

Figure S42. HRMS spectral chart for **8ce**

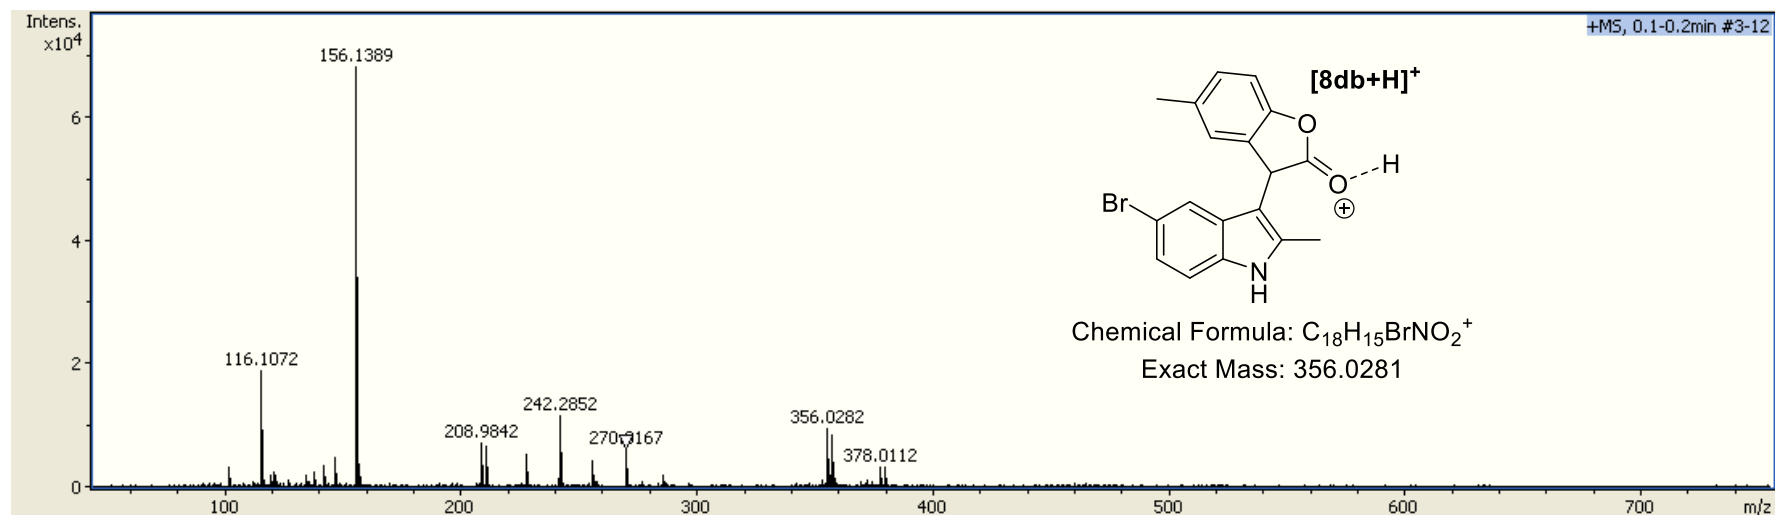

Figure S43. HRMS spectral chart for **8db**

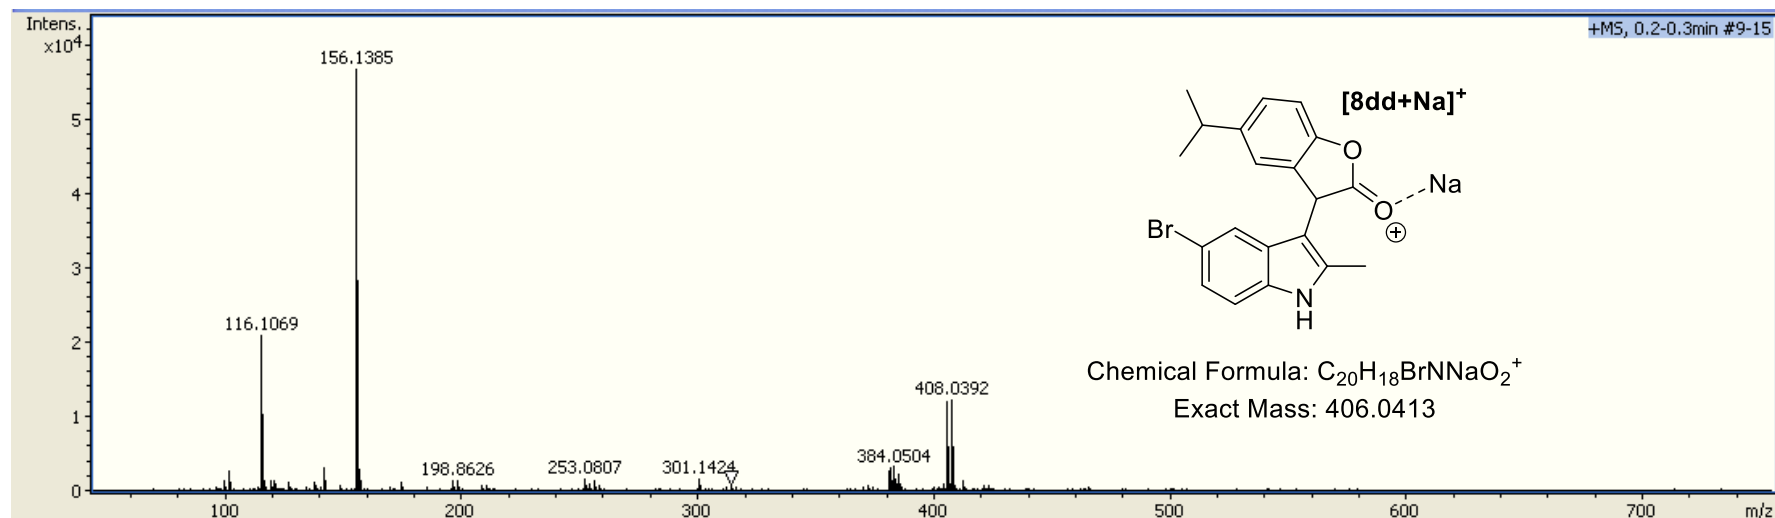

Figure S44. HRMS spectral chart for **8dd**

**HRMS spectral chart for 4,5-Dimethyl-2-(1-(2-methyl-1*H*-indol-3-yl)-2-nitroethyl)phenol (9aa):**

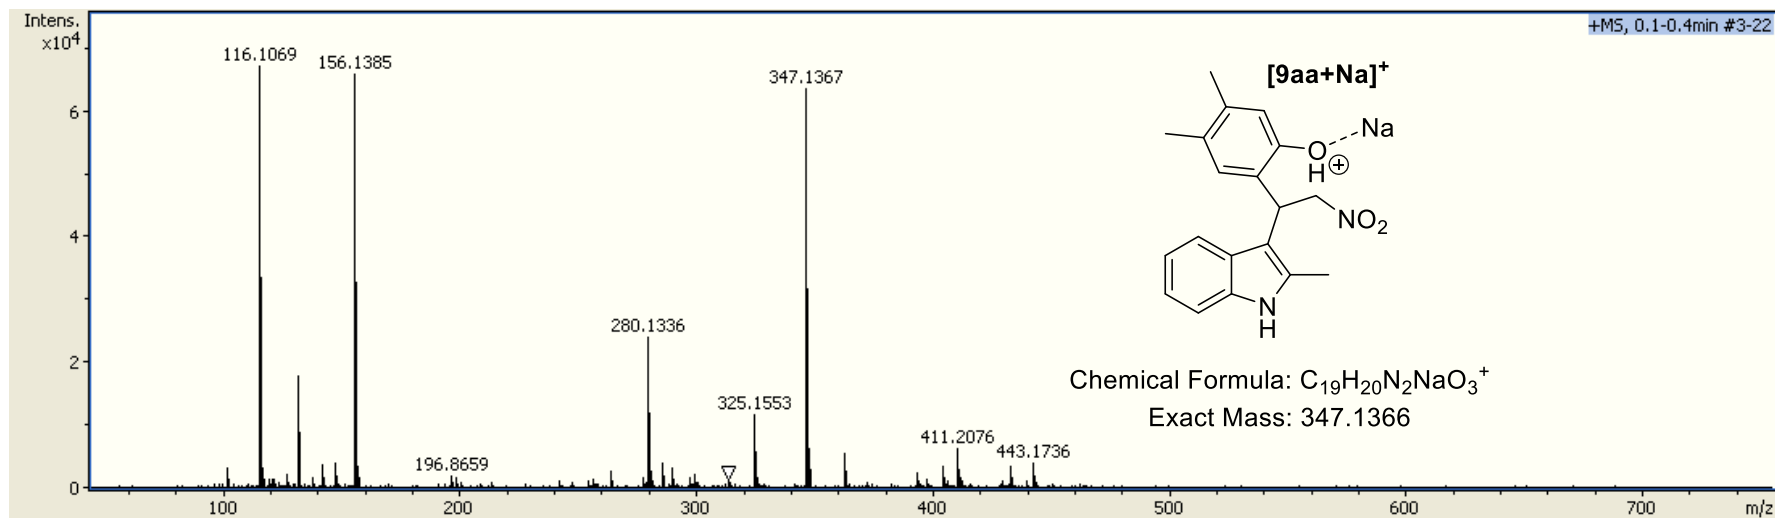

Figure S45. HRMS spectral chart for **9aa**

## X-Ray crystallography data

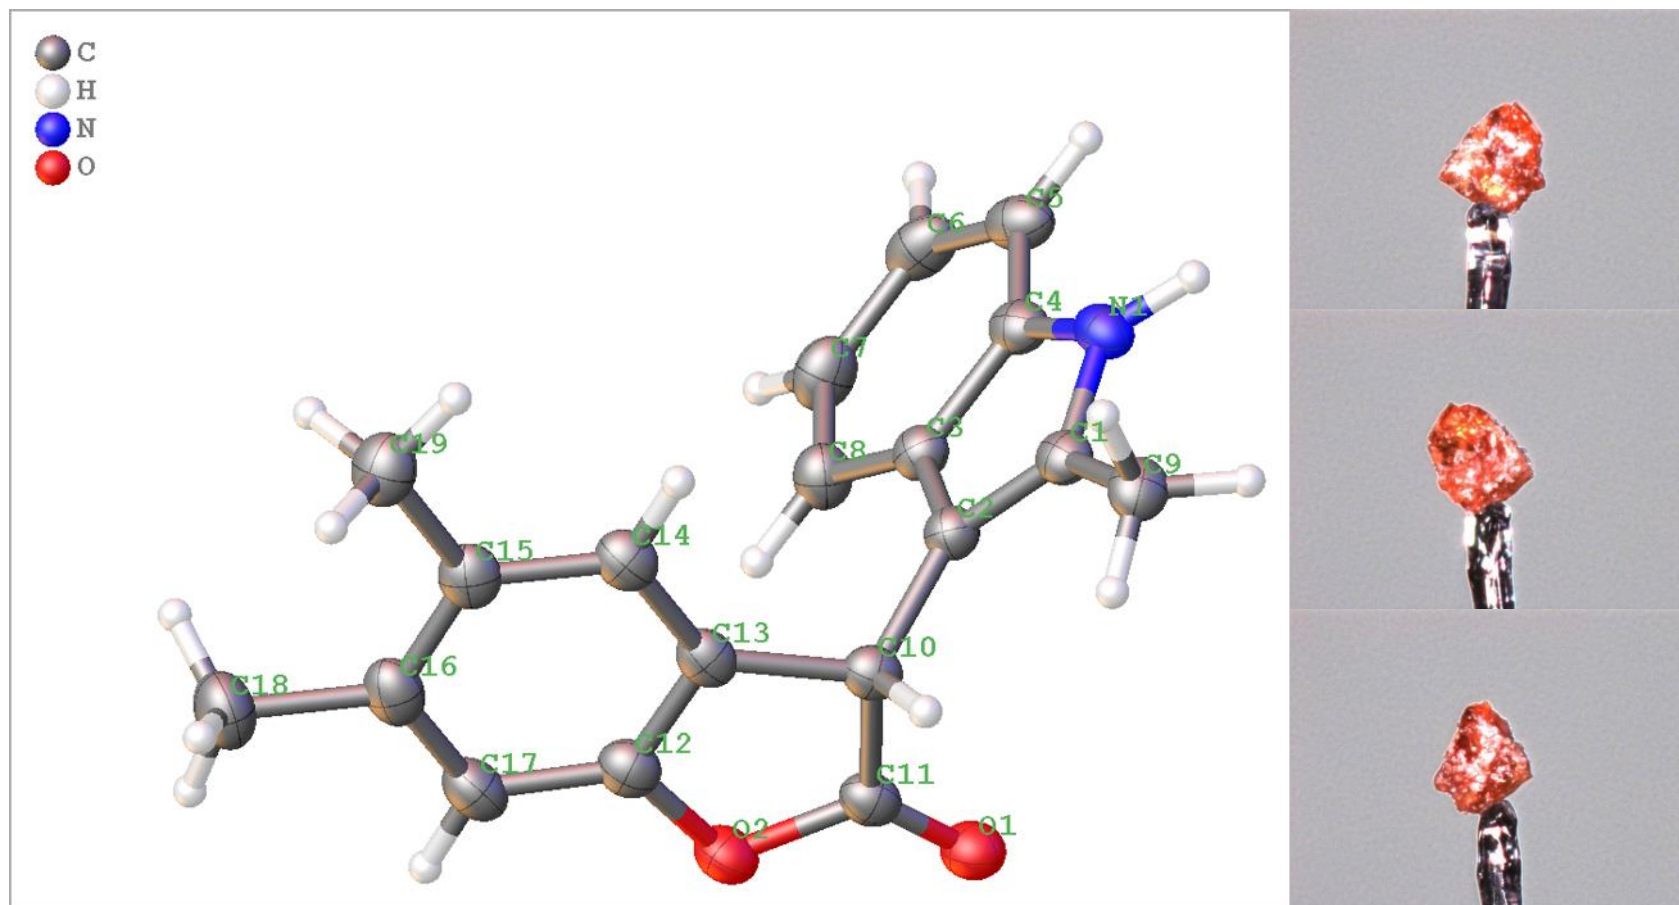

**Figure S46.** ORTEP drawing of the crystal structure showing 50% probability thermal ellipsoids (left, CCDC 2154293) and microphotography of the single crystal of compound **8aa** used for X-Ray diffraction analysis at the bottom.

**Table S1 Crystal data and structure refinement for 8aa.**

|                                             |                                                               |
|---------------------------------------------|---------------------------------------------------------------|
| Identification code                         | ANNA1909_2                                                    |
| Empirical formula                           | C <sub>19</sub> H <sub>17</sub> NO <sub>2</sub>               |
| Formula weight                              | 291.33                                                        |
| Temperature/K                               | 100(2)                                                        |
| Crystal system                              | monoclinic                                                    |
| Space group                                 | P2 <sub>1</sub> /c                                            |
| a/Å                                         | 14.0214(2)                                                    |
| b/Å                                         | 12.59540(10)                                                  |
| c/Å                                         | 8.61000(10)                                                   |
| α/°                                         | 90                                                            |
| β/°                                         | 100.8210(10)                                                  |
| γ/°                                         | 90                                                            |
| Volume/Å <sup>3</sup>                       | 1493.53(3)                                                    |
| Z                                           | 4                                                             |
| ρ <sub>calc</sub> /g/cm <sup>3</sup>        | 1.296                                                         |
| μ/mm <sup>-1</sup>                          | 0.670                                                         |
| F(000)                                      | 616.0                                                         |
| Crystal size/mm <sup>3</sup>                | 0.32 × 0.24 × 0.21                                            |
| Radiation                                   | Cu Kα (λ = 1.54184)                                           |
| 2Θ range for data collection/°              | 6.418 to 152.188                                              |
| Index ranges                                | -17 ≤ h ≤ 17, -15 ≤ k ≤ 15, -10 ≤ l ≤ 10                      |
| Reflections collected                       | 25194                                                         |
| Independent reflections                     | 3124 [R <sub>int</sub> = 0.0270, R <sub>sigma</sub> = 0.0127] |
| Data/restraints/parameters                  | 3124/0/206                                                    |
| Goodness-of-fit on F <sup>2</sup>           | 1.038                                                         |
| Final R indexes [I >= 2σ (I)]               | R <sub>1</sub> = 0.0360, wR <sub>2</sub> = 0.0935             |
| Final R indexes [all data]                  | R <sub>1</sub> = 0.0381, wR <sub>2</sub> = 0.0954             |
| Largest diff. peak/hole / e Å <sup>-3</sup> | 0.21/-0.18                                                    |



**Table S2 Fractional Atomic Coordinates ( $\times 10^4$ ) and Equivalent Isotropic Displacement Parameters ( $\text{\AA}^2 \times 10^3$ ) for 8aa.  $U_{\text{eq}}$  is defined as 1/3 of the trace of the orthogonalised  $U_{\text{H}}$  tensor.**

| Atom | <i>x</i>   | <i>y</i>    | <i>z</i>    | $U(\text{eq})$ |
|------|------------|-------------|-------------|----------------|
| O1   | 8887.8 (6) | 2418.0 (6)  | 4660.4 (10) | 33.7 (2)       |
| O2   | 7323.3 (6) | 2244.9 (6)  | 4828.3 (9)  | 32.67 (19)     |
| N1   | 9335.0 (7) | 6235.5 (7)  | 5335.5 (11) | 28.4 (2)       |
| C2   | 8520.0 (7) | 4727.8 (8)  | 5507.9 (12) | 24.8 (2)       |
| C1   | 9183.4 (7) | 5416.4 (8)  | 6327.2 (12) | 25.8 (2)       |
| C3   | 8252.7 (7) | 5118.9 (8)  | 3916.9 (12) | 26.0 (2)       |
| C13  | 7058.2 (8) | 3755.8 (8)  | 6200.8 (12) | 27.5 (2)       |
| C11  | 8198.4 (8) | 2759.0 (8)  | 5147.3 (12) | 28.2 (2)       |
| C10  | 8124.2 (8) | 3751.9 (8)  | 6146.8 (12) | 26.4 (2)       |
| C14  | 6479.3 (8) | 4456.5 (9)  | 6838.0 (12) | 29.3 (2)       |
| C12  | 6644.4 (8) | 2851.7 (9)  | 5458.4 (13) | 30.1 (2)       |
| C4   | 8781.4 (8) | 6064.9 (8)  | 3853.9 (13) | 27.5 (2)       |
| C8   | 7642.0 (8) | 4753.6 (10) | 2544.7 (13) | 31.7 (2)       |
| C15  | 5494.4 (8) | 4234.2 (10) | 6758.5 (12) | 31.6 (2)       |
| C9   | 9687.3 (8) | 5406.0 (9)  | 8014.4 (13) | 31.0 (2)       |
| C16  | 5095.8 (8) | 3295.3 (10) | 6011.5 (13) | 34.2 (3)       |
| C5   | 8702.9 (9) | 6664.6 (9)  | 2478.2 (14) | 34.1 (3)       |
| C17  | 5680.0 (9) | 2595.0 (10) | 5341.4 (14) | 34.4 (3)       |
| C7   | 7569.2 (9) | 5346.4 (11) | 1170.0 (14) | 37.0 (3)       |
| C6   | 8089.2 (9) | 6294.3 (10) | 1142.7 (14) | 37.5 (3)       |
| C19  | 4872.4 (9) | 5001.9 (11) | 7462.8 (15) | 38.4 (3)       |
| C18  | 4031.9 (9) | 3046.4 (12) | 5913.5 (17) | 44.1 (3)       |

**Table S3 Anisotropic Displacement Parameters ( $\text{\AA}^2 \times 10^3$ ) for 8aa. The Anisotropic displacement factor exponent takes the form: -  $2\pi^2[h^2a^{*2}U_{11}+2hka^*b^*U_{12}+\dots]$ .**

| Atom | U <sub>11</sub> | U <sub>22</sub> | U <sub>33</sub> | U <sub>23</sub> | U <sub>13</sub> | U <sub>12</sub> |
|------|-----------------|-----------------|-----------------|-----------------|-----------------|-----------------|
| O1   | 36.8 (4)        | 28.5 (4)        | 36.8 (4)        | -2.3 (3)        | 9.2 (3)         | -0.4 (3)        |
| O2   | 36.4 (4)        | 27.3 (4)        | 34.7 (4)        | -3.5 (3)        | 7.7 (3)         | -5.1 (3)        |
| N1   | 31.9 (5)        | 24.1 (4)        | 31.4 (5)        | -3.5 (3)        | 11.5 (4)        | -2.5 (4)        |
| C2   | 26.4 (5)        | 25.2 (5)        | 23.4 (5)        | 0.1 (4)         | 6.4 (4)         | 1.0 (4)         |
| C1   | 27.3 (5)        | 25.0 (5)        | 26.5 (5)        | -3.2 (4)        | 9.1 (4)         | 2.1 (4)         |
| C3   | 26.5 (5)        | 27.3 (5)        | 25.1 (5)        | 1.2 (4)         | 7.7 (4)         | 2.3 (4)         |
| C13  | 32.8 (5)        | 29.9 (5)        | 19.8 (5)        | 3.5 (4)         | 5.3 (4)         | -4.5 (4)        |
| C11  | 33.6 (5)        | 25.3 (5)        | 25.5 (5)        | 2.4 (4)         | 4.8 (4)         | -2.3 (4)        |
| C10  | 31.1 (5)        | 26.2 (5)        | 21.8 (5)        | 0.8 (4)         | 4.2 (4)         | -1.1 (4)        |
| C14  | 35.1 (6)        | 32.2 (5)        | 21.1 (5)        | 1.0 (4)         | 6.1 (4)         | -3.5 (4)        |
| C12  | 35.5 (6)        | 29.7 (5)        | 25.9 (5)        | 2.3 (4)         | 7.4 (4)         | -2.3 (4)        |
| C4   | 30.2 (5)        | 25.5 (5)        | 29.4 (5)        | -0.6 (4)        | 11.9 (4)        | 3.0 (4)         |
| C8   | 30.1 (5)        | 37.9 (6)        | 26.9 (5)        | 2.0 (4)         | 4.8 (4)         | -1.5 (4)        |
| C15  | 34.3 (6)        | 37.9 (6)        | 23.1 (5)        | 4.7 (4)         | 6.9 (4)         | -1.5 (5)        |
| C9   | 31.6 (5)        | 33.3 (6)        | 27.8 (5)        | -7.3 (4)        | 4.7 (4)         | -0.2 (4)        |
| C16  | 33.6 (6)        | 40.3 (6)        | 29.0 (5)        | 6.3 (5)         | 6.5 (4)         | -6.1 (5)        |
| C5   | 40.9 (6)        | 28.4 (5)        | 37.5 (6)        | 6.6 (4)         | 18.8 (5)        | 5.0 (5)         |
| C17  | 38.5 (6)        | 32.9 (6)        | 31.3 (6)        | 0.9 (4)         | 5.4 (5)         | -9.3 (5)        |
| C7   | 33.9 (6)        | 50.4 (7)        | 26.0 (5)        | 4.4 (5)         | 4.1 (4)         | 5.6 (5)         |
| C6   | 41.5 (6)        | 43.4 (7)        | 30.8 (6)        | 13.6 (5)        | 14.9 (5)        | 13.1 (5)        |
| C19  | 36.2 (6)        | 48.1 (7)        | 32.6 (6)        | 2.2 (5)         | 11.2 (5)        | 0.9 (5)         |
| C18  | 35.2 (6)        | 51.4 (8)        | 46.3 (7)        | 2.4 (6)         | 9.2 (5)         | -9.0 (6)        |

**Table S4 Bond Lengths for 8aa.**

| Atom | Atom | Length/Å    | Atom | Atom | Length/Å    |
|------|------|-------------|------|------|-------------|
| O1   | C11  | 1.2028 (14) | C13  | C12  | 1.3793 (15) |
| O2   | C11  | 1.3688 (13) | C11  | C10  | 1.5327 (14) |
| O2   | C12  | 1.4067 (14) | C14  | C15  | 1.3980 (16) |
| N1   | C1   | 1.3809 (14) | C12  | C17  | 1.3755 (16) |
| N1   | C4   | 1.3800 (14) | C4   | C5   | 1.3917 (15) |
| C2   | C1   | 1.3669 (15) | C8   | C7   | 1.3870 (16) |
| C2   | C3   | 1.4377 (14) | C15  | C16  | 1.4106 (17) |
| C2   | C10  | 1.4954 (14) | C15  | C19  | 1.5040 (17) |
| C1   | C9   | 1.4914 (15) | C16  | C17  | 1.3997 (18) |
| C3   | C4   | 1.4097 (15) | C16  | C18  | 1.5112 (16) |
| C3   | C8   | 1.4003 (15) | C5   | C6   | 1.3815 (18) |
| C13  | C10  | 1.5042 (15) | C7   | C6   | 1.4014 (18) |
| C13  | C14  | 1.3805 (16) |      |      |             |

**Table S5 Bond Angles for 8aa.**

| Atom | Atom | Atom | Angle/°     | Atom | Atom | Atom | Angle/°     |
|------|------|------|-------------|------|------|------|-------------|
| C11  | O2   | C12  | 108.16 (8)  | C13  | C10  | C11  | 101.11 (8)  |
| C4   | N1   | C1   | 109.27 (9)  | C13  | C14  | C15  | 120.11 (10) |
| C1   | C2   | C3   | 107.74 (9)  | C13  | C12  | O2   | 111.78 (10) |
| C1   | C2   | C10  | 126.53 (9)  | C17  | C12  | O2   | 124.84 (10) |
| C3   | C2   | C10  | 125.72 (9)  | C17  | C12  | C13  | 123.38 (11) |
| N1   | C1   | C9   | 120.60 (9)  | N1   | C4   | C3   | 107.74 (9)  |
| C2   | C1   | N1   | 108.89 (9)  | N1   | C4   | C5   | 130.03 (10) |
| C2   | C1   | C9   | 130.48 (10) | C5   | C4   | C3   | 122.23 (11) |
| C4   | C3   | C2   | 106.34 (9)  | C7   | C8   | C3   | 118.59 (11) |
| C8   | C3   | C2   | 134.43 (10) | C14  | C15  | C16  | 119.56 (11) |
| C8   | C3   | C4   | 119.21 (10) | C14  | C15  | C19  | 119.59 (11) |
| C14  | C13  | C10  | 132.55 (10) | C16  | C15  | C19  | 120.85 (11) |

**Table S5 Bond Angles for 8aa.**

| Atom | Atom | Atom | Angle/°     | Atom | Atom | Atom | Angle/°     |
|------|------|------|-------------|------|------|------|-------------|
| C12  | C13  | C10  | 108.48 (9)  | C15  | C16  | C18  | 120.12 (11) |
| C12  | C13  | C14  | 118.97 (10) | C17  | C16  | C15  | 120.25 (10) |
| O1   | C11  | O2   | 120.66 (10) | C17  | C16  | C18  | 119.62 (11) |
| O1   | C11  | C10  | 129.11 (10) | C6   | C5   | C4   | 117.55 (11) |
| O2   | C11  | C10  | 110.23 (9)  | C12  | C17  | C16  | 117.71 (11) |
| C2   | C10  | C13  | 116.63 (9)  | C8   | C7   | C6   | 121.18 (11) |
| C2   | C10  | C11  | 113.28 (9)  | C5   | C6   | C7   | 121.22 (11) |

**Table S6 Torsion Angles for 8aa.**

| A  | B   | C   | D   | Angle/°     | A   | B   | C   | D   | Angle/°     |
|----|-----|-----|-----|-------------|-----|-----|-----|-----|-------------|
| O1 | C11 | C10 | C2  | 49.60 (15)  | C10 | C2  | C3  | C4  | 178.47 (9)  |
| O1 | C11 | C10 | C13 | 175.17 (11) | C10 | C2  | C3  | C8  | -3.30 (19)  |
| O2 | C11 | C10 | C2  | -130.43 (9) | C10 | C13 | C14 | C15 | -           |
| O2 | C11 | C10 | C13 | -4.86 (11)  | C10 | C13 | C12 | O2  | -2.77 (12)  |
| O2 | C12 | C17 | C16 | -           | C10 | C13 | C12 | C17 | 178.04 (10) |
| N1 | C4  | C5  | C6  | 179.49 (10) | C14 | C13 | C10 | C2  | -53.04 (15) |
| C2 | C3  | C4  | N1  | -0.27 (11)  | C14 | C13 | C10 | C11 | -           |
| C2 | C3  | C4  | C5  | 179.94 (10) | C14 | C13 | C12 | O2  | 177.89 (9)  |
| C2 | C3  | C8  | C7  | -           | C14 | C13 | C12 | C17 | -1.30 (16)  |
| C1 | N1  | C4  | C3  | 0.93 (11)   | C14 | C15 | C16 | C17 | -0.58 (16)  |
| C1 | N1  | C4  | C5  | -           | C14 | C15 | C16 | C18 | -           |
| C1 | C2  | C3  | C4  | -0.49 (11)  | C12 | O2  | C11 | O1  | -           |
| C1 | C2  | C3  | C8  | 177.73 (12) | C12 | O2  | C11 | C10 | 3.50 (11)   |

**Table S6 Torsion Angles for 8aa.**

| A   | B   | C   | D   | Angle/°                     | A   | B   | C   | D   | Angle/°                     |
|-----|-----|-----|-----|-----------------------------|-----|-----|-----|-----|-----------------------------|
| C1  | C2  | C10 | C13 | 114.60 (12)                 | C12 | C13 | C10 | C2  | 127.73 (10)                 |
| C1  | C2  | C10 | C11 | <sup>-</sup><br>128.64 (11) | C12 | C13 | C10 | C11 | 4.44 (11)                   |
| C3  | C2  | C1  | N1  | 1.07 (12)                   | C12 | C13 | C14 | C15 | 1.47 (15)                   |
| C3  | C2  | C1  | C9  | 178.95 (10)                 | C4  | N1  | C1  | C2  | -1.26 (12)                  |
| C3  | C2  | C10 | C13 | -64.17 (14)                 | C4  | N1  | C1  | C9  | -179.39 (9)                 |
| C3  | C2  | C10 | C11 | 52.59 (14)                  | C4  | C3  | C8  | C7  | -0.84 (16)                  |
| C3  | C4  | C5  | C6  | -0.77 (16)                  | C4  | C5  | C6  | C7  | -0.37 (17)                  |
| C3  | C8  | C7  | C6  | -0.27 (18)                  | C8  | C3  | C4  | N1  | -178.82 (9)                 |
| C13 | C14 | C15 | C16 | -0.56 (16)                  | C8  | C3  | C4  | C5  | 1.39 (16)                   |
| C13 | C14 | C15 | C19 | 179.76 (10)                 | C8  | C7  | C6  | C5  | 0.90 (18)                   |
| C13 | C12 | C17 | C16 | 0.17 (17)                   | C15 | C16 | C17 | C12 | 0.77 (17)                   |
| C11 | O2  | C12 | C13 | -0.48 (12)                  | C19 | C15 | C16 | C17 | 179.10 (10)                 |
| C11 | O2  | C12 | C17 | 178.69 (10)                 | C19 | C15 | C16 | C18 | -0.18 (17)                  |
| C10 | C2  | C1  | N1  | -177.88 (9)                 | C18 | C16 | C17 | C12 | <sup>-</sup><br>179.96 (11) |
| C10 | C2  | C1  | C9  | -0.01 (18)                  |     |     |     |     |                             |

**Table S7 Hydrogen Atom Coordinates (Å×10<sup>4</sup>) and Isotropic Displacement Parameters (Å<sup>2</sup>×10<sup>3</sup>) for 8aa.**

| Atom | <i>x</i> | <i>y</i> | <i>z</i> | U(eq) |
|------|----------|----------|----------|-------|
| H10  | 8495.94  | 3622.09  | 7239.98  | 32    |
| H14  | 6750.59  | 5090.68  | 7331.16  | 35    |
| H8   | 7285.22  | 4113.28  | 2555.25  | 38    |
| H9A  | 10381.1  | 5543.99  | 8073.66  | 47    |
| H9B  | 9602.03  | 4710.08  | 8478.64  | 47    |
| H9C  | 9410.03  | 5957.16  | 8599.44  | 47    |
| H5   | 9058.26  | 7305.06  | 2458.17  | 41    |
| H17  | 5419.45  | 1964.16  | 4823.58  | 41    |

**Table S7 Hydrogen Atom Coordinates ( $\text{\AA} \times 10^4$ ) and Isotropic Displacement Parameters ( $\text{\AA}^2 \times 10^3$ ) for 8aa.**

| Atom | <i>x</i>  | <i>y</i>  | <i>z</i>  | U(eq)  |
|------|-----------|-----------|-----------|--------|
| H7   | 7159.56   | 5105.55   | 229.94    | 44     |
| H6   | 8018.33   | 6689.59   | 188.19    | 45     |
| H19A | 5272.29   | 5596.3    | 7945.94   | 58     |
| H19B | 4585.14   | 4639.23   | 8271.03   | 58     |
| H19C | 4354.29   | 5270.46   | 6630.2    | 58     |
| H18A | 3899.61   | 2945.08   | 6981.6    | 66     |
| H18B | 3867.12   | 2396.2    | 5296.16   | 66     |
| H18C | 3638.89   | 3636.41   | 5399.22   | 66     |
| H1   | 9865 (11) | 6696 (12) | 5526 (17) | 42 (4) |

**Experimental**

Single crystals of  $\text{C}_{19}\text{H}_{17}\text{NO}_2$  **8aa** were obtained by slow evaporation of saturated solution in EtOAc. A suitable crystal was selected and mounted on the glass stick by acrylic glue on a **SuperNova, Dual, Cu at home/near, AtlasS2** diffractometer. The crystal was kept at 100(2) K during data collection. Using Olex2 [1], the structure was solved with the SHELXT [2] structure solution program using Intrinsic Phasing and refined with the SHELXL [3] refinement package using Least Squares minimisation.

**Crystal structure determination of 8aa**

**Crystal Data** for  $\text{C}_{19}\text{H}_{17}\text{NO}_2$  ( $M = 291.33$  g/mol): monoclinic, space group  $P2_1/c$  (no. 14),  $a = 14.0214(2)$  Å,  $b = 12.59540(10)$  Å,  $c = 8.61000(10)$  Å,  $\beta = 100.8210(10)^\circ$ ,  $V = 1493.53(3)$  Å<sup>3</sup>,  $Z = 4$ ,  $T = 100(2)$  K,  $\mu(\text{Cu K}\alpha) = 0.670$  mm<sup>-1</sup>,  $D_{\text{calc}} = 1.296$  g/cm<sup>3</sup>, 25194 reflections measured ( $6.418^\circ \leq 2\theta \leq 152.188^\circ$ ), 3124 unique ( $R_{\text{int}} = 0.0270$ ,  $R_{\text{sigma}} = 0.0127$ ) which were used in all calculations. The final  $R_1$  was 0.0360 ( $I > 2\sigma(I)$ ) and  $wR_2$  was 0.0954 (all data).

**Refinement model description**

Number of restraints - 0, number of constraints - 0.

Details:

1. Fixed Uiso
  - At 1.2 times of:
    - All C(H) groups
  - At 1.5 times of:
    - All C(H,H,H) groups
- 2.a Ternary CH refined with riding coordinates:
  - C10(H10)
- 2.b Aromatic/amide H refined with riding coordinates:
  - C14(H14), C8(H8), C5(H5), C17(H17), C7(H7), C6(H6)
- 2.c Idealised Me refined as rotating group:
  - C9(H9A,H9B,H9C), C19(H19A,H19B,H19C), C18(H18A,H18B,H18C)

This report has been created with Olex2, compiled on 2020.11.12 svn.r5f609507 for OlexSys. Please [let us know](#) if there are any errors or if you would like to have additional features.

## References

1. Dolomanov, O.V., Bourhis, L.J., Gildea, R.J, Howard, J.A.K. & Puschmann, H. (2009), *J. Appl. Cryst.* 42, 339-341.
2. Sheldrick, G.M. (2008). *Acta Cryst.* A64, 112-122.
3. Sheldrick, G.M. (2015). *Acta Cryst.* C71, 3-8.
